# Supplementary material for: Trends in, projections of, and inequalities in non-communicable disease management indicators in Vietnam 2010–2030 and progress toward universal health coverage: A Bayesian analysis at national and sub-national levels
Source: PubMed Central journal article supplement — eClinicalMedicine. 2022 Jul 11;51:101550. doi: 10.1016/j.eclinm.2022.101550 (PMC9287489; doi:10.1016/j.eclinm.2022.101550), 2022-07-11
Supplement: mmc1.pdf [file mmc1.pdf]

## Supplementary

### **Trends in, projections of, and inequalities in non-communicable diseases management indicators in Vietnam 2010–2030 and progress toward universal health coverage: A Bayesian analysis at national and sub-national levels**

#### **Authors:**

Phuong The Nguyen<sup>1,2\*</sup>, Stuart Gilmour<sup>1</sup>, Phuong Mai Le<sup>1</sup>, Hoa L. Nguyen<sup>3</sup>, Thi Minh An Dao<sup>4,5</sup>, Bao Quoc Tran<sup>6</sup>, Minh Van Hoang<sup>7</sup>, Huy Van Nguyen<sup>1,8,9</sup>

#### **Affiliations:**

<sup>1</sup> Graduate School of Public Health, St. Luke's International University, Tokyo, Japan

<sup>2</sup> Division of Surveillance and Policy Evaluation, National Cancer Center Institute for Cancer Control, Tokyo, Japan

<sup>3</sup> Department of Population and Quantitative Health Sciences, University of Massachusetts Chan Medical School, Massachusetts, USA

<sup>4</sup> School of Public Health, The University of Queensland, Queensland, Australia

<sup>5</sup> Institution for Preventive Medicine and Public Health, Hanoi Medical University, Hanoi, Vietnam

<sup>6</sup> General Department of Preventive Medicine, Ministry of Health, Hanoi, Vietnam

<sup>7</sup> Hanoi University of Public Health, Hanoi, Vietnam

<sup>8</sup> Health Innovation and Transformation Centre, Federation University, Victoria, Australia

<sup>9</sup> School of Medicine and Dentistry, Griffith University, Queensland, Australia

## Table of Contents

|                                                                                                                                                                             |    |
|-----------------------------------------------------------------------------------------------------------------------------------------------------------------------------|----|
| Table S1: Description of the Included Surveys.....                                                                                                                          | 3  |
| Table S2: List of non-communicable disease (NCD) health service indicators and data sources.....                                                                            | 4  |
| Bayesian models .....                                                                                                                                                       | 6  |
| Table S3: Model comparison using leave-one-out cross-validation for wealth index .....                                                                                      | 7  |
| Table S4: Model comparison using leave-one-out cross-validation for regional levels.....                                                                                    | 8  |
| Table S5: Model comparison using leave-one-out cross-validation for educational levels .....                                                                                | 9  |
| Table S6: Model comparison using leave-one-out cross-validation for living area.....                                                                                        | 10 |
| Table S7: Model comparison using leave-one-out cross-validation for ethnic groups.....                                                                                      | 11 |
| Table S8: Model comparison using leave-one-out cross-validation for genders .....                                                                                           | 12 |
| Table S9: Average annual percent of change in NCD management indicators in different periods .....                                                                          | 13 |
| Table S10: Observed, predicted coverage and probability of reaching targets of NCD management in Vietnam by genders, 2010–2030.....                                         | 14 |
| Table S11: Observed, predicted coverage and probability of reaching targets of NCD management in Vietnam by ethnic groups, 2010–2030 .....                                  | 15 |
| Table S12: Observed, predicted coverage and probability of reaching targets of NCD management in Vietnam by living areas, 2010–2030.....                                    | 16 |
| Table S13: Observed, predicted coverage and probability of reaching targets of NCD management in Vietnam by regional levels, 2010–2030 .....                                | 17 |
| Table S14: Observed, predicted coverage and probability of reaching targets of NCD management in Vietnam by completed wealth quintiles (before imputation), 2010–2030 ..... | 19 |
| Table S15: Observed, predicted coverage and probability of reaching targets of NCD management in Vietnam by imputed wealth quintiles (after imputation), 2010–2030 .....    | 20 |
| Table S16: Observed, predicted coverage and probability of reaching targets of NCD management in Vietnam by educational levels, 2010–2030.....                              | 21 |
| Table S17: Sensitivity analysis of composite methods in observed, predicted coverage and probability of reaching targets by genders, 2010–2030.....                         | 22 |
| Table S18: Sensitivity analysis of composite methods in observed, predicted coverage and probability of reaching targets by ethnic groups, 2010–2030 .....                  | 23 |
| Table S19: Sensitivity analysis of composite methods in observed, predicted coverage and probability of reaching targets by living areas, 2010–2030.....                    | 24 |
| Table S20: Sensitivity analysis of composite methods in observed, predicted coverage and probability of reaching targets by regional levels, 2010–2030 .....                | 25 |
| Table S21: Sensitivity analysis of composite methods in observed, predicted coverage and probability of reaching targets by wealth quintiles, 2010–2030.....                | 27 |
| Table S22: Sensitivity analysis of composite methods in observed, predicted coverage and probability of reaching targets by educational levels, 2010–2030.....              | 28 |
| Table S23: Inequality analyses of all NCD management indicators for year 2010 .....                                                                                         | 29 |
| Table S24: Wealth inequality in NCD management for all survey years stratifying by genders .....                                                                            | 30 |
| Table S25: Wealth inequality in NCD management for all survey years stratifying by ethnic groups .....                                                                      | 31 |
| Table S26: Wealth inequality in NCD management for all survey years stratifying by living areas .....                                                                       | 32 |
| Table S27: Changes in inequality of NCD management coverage in Vietnam (2010–2015).....                                                                                     | 33 |
| Table S28: Changes in Wealth inequality in NCD management, 2010-2015, stratifying by genders.....                                                                           | 34 |
| Table S29: Changes in Wealth inequality in NCD management, 2010-2015, stratifying by ethnic groups.....                                                                     | 35 |
| Table S30: Changes in Wealth inequality in NCD management, 2010-2015, stratifying by living areas .....                                                                     | 36 |
| Figure S1: Trends in and projections of coverage of NCD composite coverage .....                                                                                            | 37 |
| Figure S2: Trends in and projections of coverage of NCD composite prevention .....                                                                                          | 38 |
| Figure S3: Trends in and projections of coverage of NCD composite treatment.....                                                                                            | 39 |
| Figure S4: Trends in and projections of coverage of non-use of tobacco.....                                                                                                 | 40 |
| Figure S5: Trends in and projections of coverage of non-harmful use of alcohol .....                                                                                        | 41 |
| Figure S6: Trends in and projections of coverage of sufficient physical activity.....                                                                                       | 42 |
| Figure S7: Trends in and projections of coverage of sufficient use of fruit and vegetables.....                                                                             | 43 |
| Figure S8: Trends in and projections of coverage of non-overweight.....                                                                                                     | 44 |
| Figure S9: Trends in and projections of coverage of treatment of hypertension.....                                                                                          | 45 |
| Figure S10: Trends in and projections of coverage of treatment of diabetes.....                                                                                             | 46 |
| Process of Principal Component Analysis .....                                                                                                                               | 47 |

**Table S1: Description of the Included Surveys**

| <b>Sources of data</b>                                            | <b>Survey year</b> | <b>Sampling design</b>        | <b>Sample households</b> | <b>Response Rate</b> |
|-------------------------------------------------------------------|--------------------|-------------------------------|--------------------------|----------------------|
| Vietnam STEPwise Approach to NCD Risk Factor Surveillance (STEPS) | 2009-2010          | Two-stage stratified sampling | 14706                    | 64.1%                |
| Vietnam STEPwise Approach to NCD Risk Factor Surveillance (STEPS) | 2015               | Two-stage stratified sampling | 3758                     | 79.8%                |
| Vietnam Global Adults Tobacco Survey (VGATS)                      | 2010               | Two-stage stratified sampling | 9925                     | 92.7%                |
| Vietnam Global Adults Tobacco Survey (VGATS)                      | 2015               | Two-stage stratified sampling | 9206                     | 95.8%                |
| <b>Total</b>                                                      |                    |                               | <b>37595</b>             |                      |

**Table S2: List of non-communicable disease (NCD) health service indicators and data sources**

| Indicator                                  | Definition                                                                                                                                                                                                                                                                                                                                               | Numerator                                                                                                                                                                                                                                                                                                                                        | Denominator                                                                                                                                                 | Data source (questions used)                                                                                                                                                                                                                                                                         |
|--------------------------------------------|----------------------------------------------------------------------------------------------------------------------------------------------------------------------------------------------------------------------------------------------------------------------------------------------------------------------------------------------------------|--------------------------------------------------------------------------------------------------------------------------------------------------------------------------------------------------------------------------------------------------------------------------------------------------------------------------------------------------|-------------------------------------------------------------------------------------------------------------------------------------------------------------|------------------------------------------------------------------------------------------------------------------------------------------------------------------------------------------------------------------------------------------------------------------------------------------------------|
| <b>Promotion and Prevention Indicators</b> |                                                                                                                                                                                                                                                                                                                                                          |                                                                                                                                                                                                                                                                                                                                                  |                                                                                                                                                             |                                                                                                                                                                                                                                                                                                      |
| Non-use of tobacco                         | The proportion of adults aged 18 years or older who currently do not smoke tobacco                                                                                                                                                                                                                                                                       | Number of adults age 18 years or older who currently do not smoke tobacco either in a daily or less than daily basis                                                                                                                                                                                                                             | Total number of respondents age 18 years or older                                                                                                           | VGATS 2010 (b01)<br>VGATS 2015 (B01)                                                                                                                                                                                                                                                                 |
| Non-harmful use of alcohol                 | The proportion of adults aged 18 years or older who do not having harmful use of alcohol (i.e., binge drinking and heavy drinking)                                                                                                                                                                                                                       | Number of adults age 18 years or older who are not having harmful use of alcohol (i.e., binge drinking and heavy drinking)                                                                                                                                                                                                                       | Total number of respondents age 18 years or older                                                                                                           | VSTEPS 2010 (xa0, a1, a2, a3, a5a, a5b, a5c, a5d, a5e, a5f, a5g)<br>VSTEPS 2015 (a1, a2, a4, a7, a10a, a10b, a10c, a10d, a10e, a10f, a10g)                                                                                                                                                           |
| Binge drinking                             | The proportion of adults aged 18 years or older who report having at least 5 drinks (for men) or 4 drinks (for women) on at least 1 occasion during the previous 30 days                                                                                                                                                                                 | Number of adults aged 18 years or older who report having at least 5 drinks (for men) or 4 drinks (for women) on at least 1 occasion during the previous 30 days                                                                                                                                                                                 | Total number of respondents age 18 years or older                                                                                                           | VSTEPS 2010 (xa0, a1, a5a, a5b, a5c, a5d, a5e, a5f, a5g)<br>VSTEPS 2015 (a1, a2, a10a, a10b, a10c, a10d, a10e, a10f, a10g)                                                                                                                                                                           |
| Heavy drinking                             | The proportion of adults aged 18 years or older who report having weekly alcohol consumption of at least 15 drinks (for men) or 8 drinks (for women).                                                                                                                                                                                                    | Number of adults aged 18 years or older who report having weekly alcohol consumption of at least 15 drinks (for men) or 8 drinks (for women).                                                                                                                                                                                                    | Total number of respondents age 18 years or older                                                                                                           | VSTEPS 2010 (xa0, a1, a2, a3, a5a, a5b, a5c, a5d, a5e, a5f, a5g)<br>VSTEPS 2015 (a1, a2, a4, a7, a10a, a10b, a10c, a10d, a10e, a10f, a10g)                                                                                                                                                           |
| Sufficient physical activity               | The proportion of adults with sufficient physical activity (defined as 150 minutes of moderate-intensity physical activity per week; or 75 minutes of vigorous-intensity physical activity per week; or an equivalent combination of moderate- and vigorous-intensity physical activity accumulating at least 600 metabolic equivalent minutes per week) | Number of adults with sufficient physical activity (defined as 150 minutes of moderate-intensity physical activity per week; or 75 minutes of vigorous-intensity physical activity per week; or an equivalent combination of moderate- and vigorous-intensity physical activity accumulating at least 600 metabolic equivalent minutes per week) | Total number of respondents age 18 years or older                                                                                                           | VSTEPS 2010 (p1, p2, p3a, p3b, p4, p5, p6a, p6b, p7, p8, p9a, p9b, p10, p11, p12a, p12b, p13, p14, p15a, p15b, p16a, p16b, xp1, xp2, xp3a, xp3b, xp4, xp5, xp6a, xp6b)<br>VSTEPS 2015 (p1, p2, p3a, p3b, p4, p5, p6a, p6b, p7, p8, p9a, p9b, p10, p11, p12a, p12b, p13, p14, p15a, p15b, p16a, p16b) |
| Sufficient use of fruit and vegetables     | The proportion of adults aged 18 years or older who eat five or more servings of fruit and/or vegetables (400 grams) on average per day                                                                                                                                                                                                                  | Number of adults aged 18 years or older who eat five or more servings of fruit and/or vegetables (400 grams) on average per day                                                                                                                                                                                                                  | Total number of respondents age 18 years or older                                                                                                           | VSTEPS 2010 (d1, d2, d3, d4)<br>VSTEPS 2015 (d1, d2, d3, d4)                                                                                                                                                                                                                                         |
| <b>Management and Treatment Indicators</b> |                                                                                                                                                                                                                                                                                                                                                          |                                                                                                                                                                                                                                                                                                                                                  |                                                                                                                                                             |                                                                                                                                                                                                                                                                                                      |
| Non-overweight                             | The proportion of adults aged 18 years or older who are not overweight (i.e., body-mass index <25.0 kg/m <sup>2</sup> )                                                                                                                                                                                                                                  | Number of adults aged 18 years or older who are not overweight (i.e., body-mass index <25.0 kg/m <sup>2</sup> )                                                                                                                                                                                                                                  | Total number of respondents age 18 years or older                                                                                                           | VSTEPS 2010 (m3, m4, m5)<br>VSTEPS 2015 (m8, m11, m12)                                                                                                                                                                                                                                               |
| Screening for cervical cancer              | The proportion of women aged 18 years or older who have ever had a screening test for cervical cancer using any of the following methods: visual inspection with acetic acid/vinegar (VIA), pap smear, human papillomavirus (HPV) test.                                                                                                                  | Number of women aged 18 years or older who have ever had a screening test for cervical cancer using any of the following methods: visual inspection with acetic acid/vinegar (VIA), pap smear, human papillomavirus (HPV) test.                                                                                                                  | Total number of female respondents age 18 years or older                                                                                                    | VSTEPS 2015 (cx1)                                                                                                                                                                                                                                                                                    |
| Treatment of diabetes                      | The proportion of respondents who use medication for treating/controlling diabetes or raised blood glucose among those either have raised blood glucose (plasma venous value ≥ 7mmol) OR were diagnosed with diabetes by a doctor OR are on medication for diabetes                                                                                      | Number of respondents who use medication (excluding traditional medicine) for treating/controlling diabetes or raised blood glucose                                                                                                                                                                                                              | Number of respondents aged 18 years or older who either have raised blood glucose (plasma venous value ≥ 7mmol) OR were diagnosed with diabetes by a doctor | VSTEPS 2010 (h7, xh8, b1, b5)<br>VSTEPS 2015 (h7a, h8, b5, b6)                                                                                                                                                                                                                                       |

|                               |                                                                                                                                                                                                                                                                                                         |                                                                                                                                          |                                                                                                                                                                                                                                                                                    |                                                                                                                           |
|-------------------------------|---------------------------------------------------------------------------------------------------------------------------------------------------------------------------------------------------------------------------------------------------------------------------------------------------------|------------------------------------------------------------------------------------------------------------------------------------------|------------------------------------------------------------------------------------------------------------------------------------------------------------------------------------------------------------------------------------------------------------------------------------|---------------------------------------------------------------------------------------------------------------------------|
|                               |                                                                                                                                                                                                                                                                                                         |                                                                                                                                          | OR are on medication (excluding traditional medicine) for diabetes                                                                                                                                                                                                                 |                                                                                                                           |
| Treatment of hypertension     | The proportion of respondents who use medication for treating/controlling hypertension or raised blood pressure among those either have raised blood pressure (SBP $\geq$ 140 and/or DBP $\geq$ 90mmHg) OR were diagnosed with hypertension by a doctor OR are on medication for hypertension           | Number of respondents who use medication (excluding traditional medicine) for treating/controlling hypertension or raised blood pressure | Number of respondents aged 18 years or older who either have raised blood pressure (SBP $\geq$ 140 and/or DBP $\geq$ 90 mmHg) OR were diagnosed with hypertension by a doctor OR are on medication (excluding traditional medicine) for hypertension                               | VSTEPS 2010 (m11a, m11b, m12a, m12b, m13a, m13b, m14, h2, h3a)<br>VSTEPS 2015 (m4a, m4b, m5a, m5b, m6a, m6b, m7, h2a, h3) |
| Treatment of high cholesterol | The proportion of respondents who use medication for treating/controlling high cholesterol among those either have high total blood cholesterol (total cholesterol $\geq$ 6.2 mmol/L or $\geq$ 240 mg/dl) OR were diagnosed with high cholesterol by a doctor OR are on medication for high cholesterol | Number of respondents who use medication (excluding traditional medicine) for treating/controlling high cholesterol                      | Number of respondents aged 18 years or older who either have high total blood cholesterol (total cholesterol $\geq$ 6.2 mmol/L or $\geq$ 240 mg/dl) OR were diagnosed with high cholesterol by a doctor OR are on medication (excluding traditional medicine) for high cholesterol | VSTEPS 2015 (b1, xb1, b4, b8, b9, h13a, h14)                                                                              |

Note: VSTEPS=Vietnam STEPwise Approach to NCD Risk Factor Surveillance; VGATS=Vietnam Global Adult Tobacco Survey;

## Bayesian models

We developed the Bayesian regression model step by step from a standard Frequentist linear regression model. First, we considered a standard linear regression model of  $y_i$ , which is the logistic transformation of outcomes (coverage of NCD indicators). That is,

$$y_i = \ln\left(\frac{p_i}{1-p_i}\right)$$

Where here  $p_i$  is the proportion measured of the  $i$ -th indicator. The  $i$  subscript measures the indicator number, i.e.  $j \in (1, \dots, 16)$ . The linear regression model can also be written as

$$y_i \sim \text{Normal}(\mu_i, \sigma^2)$$

$$\mu_i = \alpha + \beta X'_i$$

Where,  $X'$  is a vector of predictors including continuous variable of time, dummy variables of gender, ethnic groups, living area, wealth quintile, or educational level, and the interaction terms between time and those dummy variables. The prior for model parameters were specified as:

$$\alpha \sim \text{Student}_3(\text{median}(y_i), 10)$$

$$\beta \sim 1 \text{ (flat)}$$

and

$$\sigma \sim \text{Student}_3(0, 10)$$

For regional level, we extended this model to a classical mixed effects model. To allow each region  $j$  to have a unique intercept for different means with others, we added  $\alpha_j$  to the model. Similarly, we used a varying slope to indicate that each region is allowed to have a different trend line with others (random effect intercepts and random effect slopes). We evaluated this correlation by  $\alpha$  region and  $\beta$  region as specified on the following model:

$$\mu_{ij} = \alpha + \alpha_j + (\beta + \beta_j)x_{ij}$$

$$\begin{bmatrix} \alpha_j \\ \beta_j \end{bmatrix} \sim \text{MVNormal} \left( \begin{bmatrix} 0 \\ 0 \end{bmatrix}, S \right)$$

$$S = \begin{pmatrix} \sigma_{\alpha_j}^2 & \sigma_{\alpha_j} \sigma_{\beta_j} \rho \\ \sigma_{\alpha_j} \sigma_{\beta_j} \rho & \sigma_{\beta_j}^2 \end{pmatrix}$$

To ensure the prior was non-informative, we gave  $\alpha$  and  $\beta$  the Normal(0, 4) prior, which allows  $\alpha$  and  $\beta$  to mostly lie in a large range between -10 and 10. The residual variation  $\sigma$  was given a Half-Cauchy before restricting the distribution to positive values.  $\mathbf{M}$  is the correlation matrix, and  $\rho$  is the correlation between intercepts and slopes. This matrix was set to an LKJ-Correlation prior.

**Table S3: Model comparison using leave-one-out cross-validation for wealth index**

| Model                                 | Model without interaction |         |         | Model with interaction |         |         | Difference |       | Interaction term used |
|---------------------------------------|---------------------------|---------|---------|------------------------|---------|---------|------------|-------|-----------------------|
|                                       | ELPD_o                    | P_LOO_o | LOOIC_o | ELPD_i                 | P_LOO_i | LOOIC_i | ELPD       | LOOIC |                       |
| Non-use of tobacco                    | -56.0                     | 10.8    | 112.0   | -57.4                  | 13.1    | 114.8   | -1.4       | 2.8   | No                    |
| Non-harmful use of alcohol            | -70.3                     | 26.8    | 140.5   | -72.8                  | 31.7    | 145.7   | -2.6       | 5.2   | No                    |
| Sufficient physical activity          | -80.3                     | 34.2    | 160.6   | -83.2                  | 41.3    | 166.5   | -2.9       | 5.8   | No                    |
| Sufficient use of fruit and vegetable | -69.4                     | 25.8    | 138.8   | -77.9                  | 36.5    | 155.7   | -8.5       | 16.9  | No                    |
| Non-overweight                        | -66.3                     | 26.0    | 132.5   | -73.8                  | 34.4    | 147.6   | -7.5       | 15.1  | No                    |
| Treatment of diabetes                 | -58.0                     | 21.9    | 115.9   | -66.5                  | 32.0    | 133.0   | -8.6       | 17.1  | No                    |
| Treatment of hypertension             | -39.3                     | 13.2    | 78.6    | -48.7                  | 23.1    | 97.3    | -9.4       | 18.8  | No                    |
| Composite Prevention (meta)           | -49.3                     | 8.1     | 98.7    | -57.5                  | 15.7    | 115.1   | -8.2       | 16.4  | No                    |
| Composite Treatment (meta)            | -57.2                     | 31.3    | 114.4   | -105.2                 | 78.6    | 210.5   | -48.1      | 96.1  | No                    |
| Composite health coverage (meta)      | -116.0                    | 90.2    | 231.9   | -201.9                 | 175.0   | 403.8   | -85.9      | 171.9 | No                    |
| Composite Prevention (a.mean)         | -50.5                     | 8.7     | 100.9   | -55.2                  | 13.4    | 110.3   | -4.7       | 9.4   | No                    |
| Composite Treatment (a.mean)          | -55.5                     | 29.5    | 111.1   | -106.0                 | 79.4    | 212.0   | -50.5      | 100.9 | No                    |
| Composite health coverage (a.mean)    | -107.2                    | 81.3    | 214.3   | -223.7                 | 196.9   | 447.4   | -116.6     | 233.1 | No                    |
| Composite Prevention (geo.mean)       | -52.0                     | 10.6    | 104.1   | -62.1                  | 19.9    | 124.2   | -10.1      | 20.2  | No                    |
| Composite Treatment (geo.mean)        | -59.4                     | 33.5    | 118.9   | -103.0                 | 76.4    | 205.9   | -43.5      | 87.0  | No                    |
| Composite health coverage (geo.mean)  | -121.8                    | 95.8    | 243.7   | -221.2                 | 194.2   | 442.3   | -99.3      | 198.6 | No                    |

Note: LOOIC=Leave one out Criteria Information; ELPD=Expected Log Predictive Density; P\_LOO=Effective number of parameters; meta=Meta-analysis random effects; a.mean=Arithmetic Means; geo.mean=Geometric Means

**Table S4: Model comparison using leave-one-out cross-validation for regional levels**

| Model                                 | Model without interaction |                    |                    | Model with interaction |                    |                    | Difference |        | Random slope used |
|---------------------------------------|---------------------------|--------------------|--------------------|------------------------|--------------------|--------------------|------------|--------|-------------------|
|                                       | ELPD <sub>o</sub>         | P_LOO <sub>o</sub> | LOOIC <sub>o</sub> | ELPD <sub>i</sub>      | P_LOO <sub>i</sub> | LOOIC <sub>i</sub> | ELPD       | LOOIC  |                   |
| Non-use of tobacco                    | -59.8                     | 9.1                | 119.5              | 0.0                    | -85.8              | 24.9               | 171.6      | -52.1  | Yes               |
| Non-harmful use of alcohol            | -55.1                     | 8.8                | 110.2              | 0.0                    | -68.9              | 16.8               | 137.9      | -27.7  | Yes               |
| Sufficient physical activity          | -55.8                     | 9.5                | 111.6              | 0.0                    | -708.4             | 303.2              | 1416.7     | 1305.2 | Yes               |
| Sufficient use of fruit and vegetable | -56.0                     | 9.4                | 111.9              | 0.0                    | -117.3             | 43.4               | 234.5      | -122.6 | Yes               |
| Non-overweight                        | -53.1                     | 10.0               | 106.1              | 0.0                    | -196.3             | 92.9               | 392.6      | -286.5 | Yes               |
| Treatment of diabetes                 | -47.8                     | 9.2                | 95.6               | 0.0                    | -124.0             | 55.4               | 248.1      | -152.5 | Yes               |
| Treatment of hypertension             | -34.3                     | 7.3                | 68.5               | 0.0                    | -67.3              | 27.5               | 134.7      | -66.1  | Yes               |
| Composite Prevention (meta)           | -55.7                     | 7.9                | 111.5              | 0.0                    | -91.2              | 28.9               | 182.4      | -71.0  | Yes               |
| Composite Treatment (meta)            | -37.3                     | 4.7                | 74.6               | 0.0                    | -38.2              | 4.1                | 76.5       | -1.9   | Yes               |
| Composite health coverage (meta)      | -35.4                     | 2.7                | 70.7               | -0.1                   | -35.2              | 2.3                | 70.5       | 0.2    | No                |
| Composite Prevention (a.mean)         | -55.9                     | 8.0                | 111.8              | 0.0                    | -78.7              | 21.4               | 157.5      | -45.7  | Yes               |
| Composite Treatment (a.mean)          | -38.4                     | 5.6                | 76.7               | 0.0                    | -39.9              | 4.8                | 79.7       | -3.0   | Yes               |
| Composite health coverage (a.mean)    | -35.3                     | 2.6                | 70.5               | -0.2                   | -35.1              | 2.2                | 70.1       | 0.4    | No                |
| Composite Prevention (geo.mean)       | -55.6                     | 7.6                | 111.3              | 0.0                    | -89.0              | 26.7               | 177.9      | -66.7  | Yes               |
| Composite Treatment (geo.mean)        | -39.6                     | 7.2                | 79.2               | 0.0                    | -53.5              | 12.8               | 107.0      | -27.8  | Yes               |
| Composite health coverage (geo.mean)  | -38.9                     | 5.1                | 77.7               | 0.0                    | -42.2              | 6.9                | 84.4       | -6.7   | Yes               |

Note: LOOIC=Leave one out Criteria Information; ELPD=Expected Log Predictive Density; P\_LOO=Effective number of parameters; meta=Meta-analysis random effects; a.mean=Arithmetic Means; geo.mean=Geometric Means



**Table S5: Model comparison using leave-one-out cross-validation for educational levels**

| Model                                 | Model without interaction |                    |                    | Model with interaction |                    |                    | Difference |       | Interaction term used |
|---------------------------------------|---------------------------|--------------------|--------------------|------------------------|--------------------|--------------------|------------|-------|-----------------------|
|                                       | ELPD <sub>o</sub>         | P_LOO <sub>o</sub> | LOOIC <sub>o</sub> | ELPD <sub>i</sub>      | P_LOO <sub>i</sub> | LOOIC <sub>i</sub> | ELPD       | LOOIC |                       |
| Non-use of tobacco                    | -52.0                     | 8.2                | 104.0              | 0.0                    | -55.5              | 9.2                | 111.1      | -7.1  | Yes                   |
| Non-harmful use of alcohol            | -48.0                     | 8.0                | 96.0               | 0.0                    | -55.8              | 11.5               | 111.7      | -15.6 | Yes                   |
| Sufficient physical activity          | -49.0                     | 8.0                | 98.1               | 0.0                    | -51.3              | 8.3                | 102.5      | -4.5  | Yes                   |
| Sufficient use of fruit and vegetable | -48.7                     | 8.2                | 97.4               | -0.3                   | -48.4              | 7.1                | 96.8       | 0.6   | No                    |
| Non-overweight                        | -46.8                     | 9.1                | 93.7               | 0.0                    | -70.2              | 22.5               | 140.4      | -46.8 | Yes                   |
| Treatment of diabetes                 | -41.8                     | 8.0                | 83.5               | 0.0                    | -58.4              | 17.5               | 116.8      | -33.3 | Yes                   |
| Treatment of hypertension             | -32.8                     | 7.7                | 65.5               | -4.3                   | -28.5              | 3.9                | 57.0       | 8.5   | No                    |
| Composite Prevention (meta)           | -49.4                     | 8.0                | 98.9               | -3.4                   | -46.1              | 4.7                | 92.2       | 6.7   | No                    |
| Composite Treatment (meta)            | -32.8                     | 7.6                | 65.5               | -4.5                   | -28.3              | 3.8                | 56.5       | 9.0   | No                    |
| Composite health coverage (meta)      | -32.9                     | 7.9                | 65.9               | -6.1                   | -26.9              | 2.8                | 53.7       | 12.2  | No                    |
| Composite Prevention (a.mean)         | -49.4                     | 7.8                | 98.7               | -1.9                   | -47.5              | 5.5                | 94.9       | 3.8   | No                    |
| Composite Treatment (a.mean)          | -33.7                     | 8.5                | 67.4               | -6.6                   | -27.1              | 2.9                | 54.3       | 13.2  | No                    |
| Composite health coverage (a.mean)    | -33.3                     | 8.3                | 66.7               | -6.5                   | -26.9              | 2.7                | 53.7       | 13.0  | No                    |
| Composite Prevention (geo.mean)       | -49.6                     | 8.0                | 99.2               | -4.9                   | -44.6              | 3.8                | 89.3       | 9.9   | No                    |
| Composite Treatment (geo.mean)        | -33.1                     | 7.9                | 66.1               | -4.2                   | -28.8              | 4.2                | 57.7       | 8.4   | No                    |
| Composite health coverage (geo.mean)  | -33.9                     | 8.7                | 67.9               | -7.2                   | -26.8              | 2.6                | 53.6       | 14.3  | No                    |

Note: LOOIC=Leave one out Criteria Information; ELPD=Expected Log Predictive Density; P\_LOO=Effective number of parameters; meta=Meta-analysis random effects; a.mean=Arithmetic Means; geo.mean=Geometric Means

**Table S6: Model comparison using leave-one-out cross-validation for living area**

| Model                                 | Model without interaction |         |         | Model with interaction |         |         | Difference |       | Interaction term used |
|---------------------------------------|---------------------------|---------|---------|------------------------|---------|---------|------------|-------|-----------------------|
|                                       | ELPD_o                    | P_LOO_o | LOOIC_o | ELPD_i                 | P_LOO_i | LOOIC_i | ELPD       | LOOIC |                       |
| Non-use of tobacco                    | -22.9                     | 3.3     | 45.7    | -22.8                  | 3.3     | 45.6    | 0.0        | -0.2  | Yes                   |
| Non-harmful use of alcohol            | -19.2                     | 1.6     | 38.4    | -21.0                  | 3.1     | 42.0    | -1.8       | 3.6   | No                    |
| Sufficient physical activity          | -20.3                     | 2.1     | 40.5    | -21.9                  | 3.5     | 43.7    | -1.6       | 3.2   | No                    |
| Sufficient use of fruit and vegetable | -20.9                     | 2.7     | 41.8    | -21.2                  | 3.1     | 42.4    | -0.3       | 0.7   | No                    |
| Non-overweight                        | -18.4                     | 1.6     | 36.7    | -20.1                  | 3.1     | 40.3    | -1.8       | 3.6   | No                    |
| Treatment of diabetes                 | -18.6                     | 3.0     | 37.2    | -19.2                  | 3.8     | 38.4    | -0.6       | 1.2   | No                    |
| Treatment of hypertension             | -16.2                     | 4.0     | 32.4    | -15.0                  | 3.2     | 29.9    | 0.0        | -2.5  | Yes                   |
| Composite Prevention (meta)           | -19.8                     | 1.6     | 39.6    | -21.5                  | 3.1     | 43.1    | -1.7       | 3.5   | No                    |
| Composite Treatment (meta)            | -13.6                     | 1.9     | 27.1    | -15.5                  | 3.5     | 30.9    | -1.9       | 3.8   | No                    |
| Composite health coverage (meta)      | -13.1                     | 1.5     | 26.2    | -15.4                  | 3.6     | 30.9    | -2.3       | 4.6   | No                    |
| Composite Prevention (a.mean)         | -20.0                     | 1.8     | 39.9    | -22.0                  | 3.5     | 43.9    | -2.0       | 4.0   | No                    |
| Composite Treatment (a.mean)          | -13.4                     | 1.8     | 26.8    | -15.5                  | 3.6     | 30.9    | -2.0       | 4.1   | No                    |
| Composite health coverage (a.mean)    | -13.2                     | 1.6     | 26.4    | -15.1                  | 3.3     | 30.2    | -1.9       | 3.8   | No                    |
| Composite Prevention (geo.mean)       | -20.6                     | 2.2     | 41.3    | -21.6                  | 3.1     | 43.2    | -1.0       | 1.9   | No                    |
| Composite Treatment (geo.mean)        | -13.2                     | 1.6     | 26.4    | -15.5                  | 3.7     | 31.1    | -2.3       | 4.6   | No                    |
| Composite health coverage (geo.mean)  | -13.0                     | 1.4     | 26.0    | -15.1                  | 3.2     | 30.3    | -2.1       | 4.2   | No                    |

Note: LOOIC=Leave one out Criteria Information; ELPD=Expected Log Predictive Density; P\_LOO=Effective number of parameters; meta=Meta-analysis random effects; a.mean=Arithmetic Means; geo.mean=Geometric Means

**Table S7: Model comparison using leave-one-out cross-validation for ethnic groups**

| Model                                 | Model without interaction |         |         | Model with interaction |         |         | Difference |       | Interaction term used |
|---------------------------------------|---------------------------|---------|---------|------------------------|---------|---------|------------|-------|-----------------------|
|                                       | ELPD_o                    | P_LOO_o | LOOIC_o | ELPD_i                 | P_LOO_i | LOOIC_i | ELPD       | LOOIC |                       |
| Non-use of tobacco                    | -20.9                     | 2.2     | 41.8    | -22.0                  | 3.1     | 44.0    | -1.1       | 2.3   | No                    |
| Non-harmful use of alcohol            | -26.7                     | 7.2     | 53.4    | -20.9                  | 3.4     | 41.7    | 0.0        | -11.7 | Yes                   |
| Sufficient physical activity          | -20.5                     | 3.1     | 41.0    | -20.3                  | 3.3     | 40.6    | 0.0        | -0.4  | Yes                   |
| Sufficient use of fruit and vegetable | -56.9                     | 27.0    | 113.8   | -21.3                  | 3.7     | 42.7    | 0.0        | -71.1 | Yes                   |
| Non-overweight                        | -17.5                     | 1.7     | 35.0    | -19.5                  | 3.3     | 38.9    | -2.0       | 3.9   | No                    |
| Treatment of diabetes                 | -16.5                     | 2.3     | 33.1    | -17.6                  | 3.1     | 35.1    | -1.0       | 2.1   | No                    |
| Treatment of hypertension             | -12.5                     | 2.0     | 24.9    | -14.2                  | 3.6     | 28.4    | -1.7       | 3.5   | No                    |
| Composite Prevention (meta)           | -23.6                     | 4.8     | 47.2    | -21.0                  | 3.1     | 42.0    | 0.0        | -5.2  | Yes                   |
| Composite Treatment (meta)            | -13.8                     | 1.9     | 27.6    | -15.3                  | 3.1     | 30.6    | -1.5       | 3.0   | No                    |
| Composite health coverage (meta)      | -14.2                     | 1.9     | 28.4    | -15.7                  | 3.2     | 31.5    | -1.5       | 3.1   | No                    |
| Composite Prevention (a.mean)         | -23.6                     | 4.8     | 47.3    | -21.4                  | 3.5     | 42.9    | 0.0        | -4.4  | Yes                   |
| Composite Treatment (a.mean)          | -13.8                     | 1.9     | 27.6    | -15.4                  | 3.2     | 30.8    | -1.6       | 3.3   | No                    |
| Composite health coverage (a.mean)    | -14.3                     | 2.0     | 28.6    | -15.5                  | 2.9     | 31.0    | -1.2       | 2.4   | No                    |
| Composite Prevention (geo.mean)       | -29.1                     | 8.6     | 58.3    | -20.9                  | 2.9     | 41.8    | 0.0        | -16.5 | Yes                   |
| Composite Treatment (geo.mean)        | -13.6                     | 1.9     | 27.3    | -15.2                  | 3.2     | 30.5    | -1.6       | 3.2   | No                    |
| Composite health coverage (geo.mean)  | -14.0                     | 1.7     | 28.0    | -15.6                  | 3.0     | 31.2    | -1.6       | 3.2   | No                    |

Note: LOOIC=Leave one out Criteria Information; ELPD=Expected Log Predictive Density; P\_LOO=Effective number of parameters; meta=Meta-analysis random effects; a.mean=Arithmetic Means; geo.mean=Geometric Means

**Table S8: Model comparison using leave-one-out cross-validation for genders**

| Model                                 | Model without interaction |         |         | Model with interaction |         |         | Difference |       | Interaction term used |
|---------------------------------------|---------------------------|---------|---------|------------------------|---------|---------|------------|-------|-----------------------|
|                                       | ELPD_o                    | P_LOO_o | LOOIC_o | ELPD_i                 | P_LOO_i | LOOIC_i | ELPD       | LOOIC |                       |
| Non-use of tobacco                    | -19.9                     | 2.8     | 39.9    | -0.5                   | -19.4   | 2.3     | 38.8       | 1.1   | No                    |
| Non-harmful use of alcohol            | -20.4                     | 4.5     | 40.8    | -2.8                   | -17.6   | 1.8     | 35.2       | 5.6   | No                    |
| Sufficient physical activity          | -21.4                     | 3.1     | 42.7    | 0.0                    | -62.7   | 31.9    | 125.5      | -82.8 | Yes                   |
| Sufficient use of fruit and vegetable | -21.6                     | 3.4     | 43.2    | 0.0                    | -57.9   | 29.0    | 115.8      | -72.6 | Yes                   |
| Non-overweight                        | -20.6                     | 3.6     | 41.2    | 0.0                    | -24.2   | 6.0     | 48.4       | -7.2  | Yes                   |
| Treatment of diabetes                 | -18.7                     | 3.3     | 37.4    | 0.0                    | -27.0   | 9.4     | 53.9       | -16.5 | Yes                   |
| Treatment of hypertension             | -14.7                     | 2.8     | 29.4    | 0.0                    | -16.8   | 4.4     | 33.5       | -4.1  | Yes                   |
| Composite Prevention (meta)           | -21.4                     | 3.2     | 42.9    | -0.5                   | -20.9   | 2.7     | 41.8       | 1.1   | No                    |
| Composite Treatment (meta)            | -14.9                     | 3.0     | 29.8    | -0.4                   | -14.5   | 2.5     | 29.0       | 0.8   | No                    |
| Composite health coverage (meta)      | -14.8                     | 3.1     | 29.6    | -1.5                   | -13.3   | 1.8     | 26.6       | 3.0   | No                    |
| Composite Prevention (a.mean)         | -21.7                     | 3.3     | 43.4    | 0.0                    | -21.9   | 3.2     | 43.7       | -0.3  | Yes                   |
| Composite Treatment (a.mean)          | -15.0                     | 3.1     | 30.0    | -0.0                   | -15.0   | 3.0     | 29.9       | 0.1   | No                    |
| Composite health coverage (a.mean)    | -15.0                     | 3.2     | 30.0    | -1.7                   | -13.3   | 1.7     | 26.7       | 3.4   | No                    |
| Composite Prevention (geo.mean)       | -21.9                     | 3.4     | 43.8    | 0.0                    | -37.8   | 14.9    | 75.7       | -31.9 | Yes                   |
| Composite Treatment (geo.mean)        | -14.7                     | 2.8     | 29.5    | 0.0                    | -15.0   | 3.0     | 30.0       | -0.5  | Yes                   |
| Composite health coverage (geo.mean)  | -15.5                     | 3.6     | 31.1    | -2.0                   | -13.5   | 1.9     | 27.0       | 4.0   | No                    |

Note: LOOIC=Leave one out Criteria Information; ELPD=Expected Log Predictive Density; P\_LOO=Effective number of parameters; meta=Meta-analysis random effects; a.mean=Arithmetic Means; geo.mean=Geometric Means

**Table S9: Average annual percent of change in NCD management indicators in different periods**

| Indicators                            | Average Annual Percentage of Change (95% CrI) |                     |                     |                     |
|---------------------------------------|-----------------------------------------------|---------------------|---------------------|---------------------|
|                                       | Period 2010-2030                              | Period 2010-2015    | Period 2015-2020    | Period 2020-2030    |
| Non-use of tobacco                    | 0.6 (0.4 to 0.7)                              | 0.7 (0.5 to 0.9)    | 0.6 (0.4 to 0.8)    | 0.5 (0.4 to 0.6)    |
| Non-harmful use of alcohol            | -0.9 (-1.3 to -0.5)                           | -0.8 (-1.1 to -0.5) | -0.9 (-1.3 to -0.5) | -1.0 (-1.5 to -0.6) |
| Sufficient physical activity          | 0.4 (0.0 to 0.6)                              | 0.4 (0.0 to 0.7)    | 0.4 (0.0 to 0.7)    | 0.4 (0.0 to 0.6)    |
| Sufficient use of fruit and vegetable | 3.9 (3.8 to 4.0)                              | 4.9 (4.6 to 5.3)    | 5.7 (5.4 to 6.0)    | 2.5 (2.3 to 2.7)    |
| Non-overweight                        | -1.0 (-1.5 to -0.5)                           | -0.7 (-1.0 to -0.4) | -0.9 (-1.3 to -0.5) | -1.1 (-1.8 to -0.6) |
| Treatment of diabetes                 | -1.9 (-2.6 to -0.6)                           | -2.4 (-4.2 to -0.7) | -2.2 (-3.2 to -0.6) | -1.5 (-1.7 to -0.6) |
| Treatment of hypertension             | 0.8 (0.1 to 1.6)                              | 0.7 (0.1 to 1.4)    | 0.8 (0.1 to 1.5)    | 0.8 (0.1 to 1.7)    |
| Composite Prevention                  | 1.1 (0.9 to 1.3)                              | 1.4 (1.0 to 1.7)    | 1.2 (0.9 to 1.5)    | 1.0 (0.8 to 1.1)    |
| Composite Treatment                   | -0.9 (-2.2 to 0.8)                            | -0.9 (-2.7 to 0.8)  | -0.9 (-2.6 to 0.8)  | -0.9 (-1.9 to 0.7)  |
| Composite Coverage                    | 0.5 (-1.3 to 1.7)                             | 0.5 (-1.3 to 2.2)   | 0.5 (-1.3 to 1.9)   | 0.4 (-1.3 to 1.3)   |

**Table S10: Observed, predicted coverage and probability of reaching targets of NCD management in Vietnam by genders, 2010–2030**

| Indicators                            | Gender | Estimated coverage in percent (95% CI) |                     | Predicted coverage in percent (95% CrI) |                     | Probability reach target (%) |
|---------------------------------------|--------|----------------------------------------|---------------------|-----------------------------------------|---------------------|------------------------------|
|                                       |        | Year 2010                              | Year 2015           | Year 2020                               | Year 2030           |                              |
| Non-use of tobacco                    | Women  | 98.4 (98.1 to 98.8)                    | 98.9 (98.4 to 99.3) | 99.1 (98.9 to 99.2)                     | 99.4 (99.2 to 99.6) | 100.0                        |
|                                       | Men    | 48.7 (47.3 to 50.1)                    | 54.7 (52.5 to 56.9) | 60.7 (57.8 to 63.8)                     | 71.6 (66.2 to 76.9) | 0.1                          |
| Non-harmful use of alcohol            | Women  | 98.7 (98.2 to 99.0)                    | 98.0 (97.2 to 98.7) | 97.6 (96.9 to 98.1)                     | 95.7 (93.6 to 97.1) | 100.0                        |
|                                       | Men    | 60.8 (58.8 to 62.7)                    | 53.8 (50.6 to 57.0) | 46.3 (41.6 to 50.7)                     | 32.3 (24.4 to 41.1) | 0.0                          |
| Sufficient physical activity          | Women  | 66.8 (65.3 to 68.3)                    | 63.6 (60.5 to 66.6) | 60.2 (55.6 to 64.3)                     | 53.0 (43.5 to 62.1) | 0.0                          |
|                                       | Men    | 71.7 (69.8 to 73.5)                    | 78.9 (76.4 to 81.2) | 84.8 (81.3 to 87.7)                     | 92.4 (88.1 to 95.3) | 100.0                        |
| Sufficient use of fruit and vegetable | Women  | 18.3 (16.8 to 19.9)                    | 48.6 (45.3 to 51.9) | 80.0 (77.0 to 82.8)                     | 98.6 (98.0 to 99.1) | 100.0                        |
|                                       | Men    | 18.4 (16.8 to 20.1)                    | 37.0 (33.8 to 40.2) | 60.3 (55.3 to 65.3)                     | 91.1 (86.9 to 94.2) | 100.0                        |
| Non-overweight                        | Women  | 88.6 (87.5 to 89.6)                    | 83.5 (81.1 to 85.7) | 76.9 (71.8 to 81.5)                     | 58.7 (45.2 to 72.1) | 0.0                          |
|                                       | Men    | 87.5 (86.1 to 88.8)                    | 85.5 (82.9 to 87.7) | 83.1 (78.4 to 87.3)                     | 77.7 (64.7 to 87.3) | 34.4                         |
| Screening for cervical cancer         | Women  | NA                                     | 23.8 (21.5 to 26.2) | NA                                      | NA                  | NA                           |
|                                       | Men    | 57.1 (50.0 to 63.9)                    | 38.6 (29.7 to 48.4) | 22.7 (10.8 to 41.2)                     | 6.1 (1.0 to 29.5)   | 0.0                          |
| Treatment of diabetes                 | Women  | 42.4 (34.5 to 50.8)                    | 39.1 (29.5 to 49.6) | 35.9 (17.4 to 58.2)                     | 29.9 (5.0 to 74.7)  | 1.1                          |
|                                       | Men    | 34.1 (31.9 to 36.5)                    | 32.7 (28.6 to 37.2) | 31.4 (23.4 to 40.5)                     | 28.7 (14.8 to 48.4) | 0.0                          |
| Treatment of hypertension             | Women  | 18.7 (17.0 to 20.5)                    | 25.6 (21.9 to 29.7) | 33.9 (25.1 to 44.2)                     | 53.4 (31.4 to 73.8) | 0.3                          |
|                                       | Men    | NA                                     | 23.2 (18.6 to 28.6) | NA                                      | NA                  | NA                           |
| Treatment of high cholesterol         | Women  | NA                                     | 26.1 (19.5 to 33.8) | NA                                      | NA                  | NA                           |
|                                       | Men    | NA                                     | 26.1 (19.5 to 33.8) | NA                                      | NA                  | NA                           |

**Table S11: Observed, predicted coverage and probability of reaching targets of NCD management in Vietnam by ethnic groups, 2010–2030**

| Indicators                            | Ethnic group        | Estimated coverage in percent (95% CI) |                     | Predicted coverage in percent (95% CrI) |                     | Probability reach target (%) |
|---------------------------------------|---------------------|----------------------------------------|---------------------|-----------------------------------------|---------------------|------------------------------|
|                                       |                     | Year 2010                              | Year 2015           | Year 2020                               | Year 2030           |                              |
| Non-use of tobacco                    | Minorities (Others) | 71.0 (67.8 to 73.9)                    | 73.9 (70.2 to 77.4) | 77.9 (75.7 to 79.9)                     | 83.6 (80.3 to 86.6) | 98.3                         |
|                                       | Majority (Kinh)     | 74.6 (73.8 to 75.4)                    | 78.1 (76.7 to 79.5) | 81.1 (79.5 to 82.6)                     | 86.2 (83.4 to 88.5) | 100.0                        |
| Non-harmful use of alcohol            | Minorities (Others) | 79.9 (76.8 to 82.7)                    | 71.2 (66.2 to 75.9) | 60.8 (52.1 to 69.1)                     | 37.6 (22.5 to 56.8) | 0.0                          |
|                                       | Majority (Kinh)     | 80.1 (79.0 to 81.1)                    | 77.3 (75.1 to 79.3) | 74.2 (70.8 to 77.3)                     | 67.3 (59.1 to 74.6) | 0.0                          |
| Sufficient physical activity          | Minorities (Others) | 88.3 (84.1 to 91.5)                    | 89.9 (86.0 to 92.8) | 91.3 (86.3 to 94.8)                     | 93.5 (83.2 to 97.8) | 99.1                         |
|                                       | Majority (Kinh)     | 68.0 (66.7 to 69.2)                    | 67.0 (64.6 to 69.2) | 65.9 (62.4 to 69.4)                     | 63.7 (56.2 to 70.9) | 0.0                          |
| Sufficient use of fruit and vegetable | Minorities (Others) | 20.0 (15.9 to 24.8)                    | 32.1 (26.7 to 38.0) | 47.1 (38.4 to 55.9)                     | 75.9 (60.0 to 87.0) | 26.9                         |
|                                       | Majority (Kinh)     | 18.3 (17.1 to 19.5)                    | 45.3 (42.4 to 48.2) | 75.4 (72.6 to 78.0)                     | 97.7 (96.9 to 98.3) | 100.0                        |
| Non-overweight                        | Minorities (Others) | 92.3 (88.4 to 95.0)                    | 89.4 (85.8 to 92.2) | 85.1 (81.8 to 87.9)                     | 72.9 (63.4 to 80.6) | 3.9                          |
|                                       | Majority (Kinh)     | 87.9 (86.9 to 88.8)                    | 83.2 (81.1 to 85.2) | 77.3 (73.6 to 80.7)                     | 61.7 (51.4 to 70.8) | 0.0                          |
| Screening for cervical cancer         | Minorities (Others) | NA                                     | 9.5 (6.6 to 13.5)   | NA                                      | NA                  | NA                           |
|                                       | Majority (Kinh)     | NA                                     | 26.6 (24.1 to 29.3) | NA                                      | NA                  | NA                           |
| Treatment of diabetes                 | Minorities (Others) | 20.0 (10.0 to 35.9)                    | 20.0 (8.9 to 39.1)  | 11.0 (4.6 to 22.4)                      | 5.1 (1.1 to 18.5)   | 0.0                          |
|                                       | Majority (Kinh)     | 53.6 (47.9 to 59.3)                    | 42.3 (35.0 to 50.0) | 33.0 (20.2 to 47.7)                     | 17.6 (4.8 to 43.9)  | 0.0                          |
| Treatment of hypertension             | Minorities (Others) | 15.0 (12.5 to 18.0)                    | 16.7 (11.4 to 23.8) | 20.1 (14.8 to 26.2)                     | 26.5 (15.7 to 41.0) | 0.0                          |
|                                       | Majority (Kinh)     | 27.3 (25.7 to 29.0)                    | 31.2 (28.1 to 34.5) | 35.1 (28.6 to 42.3)                     | 43.7 (29.6 to 59.4) | 0.0                          |
| Treatment of high cholesterol         | Minorities (Others) | NA                                     | 22.7 (12.8 to 37.0) | NA                                      | NA                  | NA                           |
|                                       | Majority (Kinh)     | NA                                     | 24.4 (20.3 to 29.0) | NA                                      | NA                  | NA                           |

**Table S12: Observed, predicted coverage and probability of reaching targets of NCD management in Vietnam by living areas, 2010–2030**

| Indicators                            | Living Area | Estimated coverage in percent (95% CI) |                     | Predicted coverage in percent (95% CrI) |                     | Probability reach target (%) |
|---------------------------------------|-------------|----------------------------------------|---------------------|-----------------------------------------|---------------------|------------------------------|
|                                       |             | Year 2010                              | Year 2015           | Year 2020                               | Year 2030           |                              |
| Non-use of tobacco                    | Rural       | 73.6 (72.5 to 74.7)                    | 76.5 (74.7 to 78.2) | 79.1 (76.7 to 81.3)                     | 83.7 (79.3 to 87.3) | 95.7                         |
|                                       | Urban       | 75.5 (74.4 to 76.5)                    | 79.4 (77.7 to 80.9) | 82.8 (80.5 to 84.9)                     | 88.3 (84.6 to 91.2) | 100.0                        |
| Non-harmful use of alcohol            | Rural       | 79.0 (77.8 to 80.3)                    | 75.0 (72.1 to 77.7) | 69.9 (66.3 to 73.2)                     | 58.8 (50.5 to 66.5) | 0.0                          |
|                                       | Urban       | 82.5 (80.9 to 83.9)                    | 78.3 (75.5 to 80.8) | 74.2 (71.1 to 77.2)                     | 63.8 (56.1 to 71.0) | 0.0                          |
| Sufficient physical activity          | Rural       | 73.1 (71.6 to 74.6)                    | 76.0 (73.0 to 78.8) | 77.7 (74.9 to 80.2)                     | 81.6 (76.5 to 85.7) | 75.3                         |
|                                       | Urban       | 60.0 (58.2 to 61.7)                    | 62.1 (59.1 to 65.1) | 65.4 (62.0 to 68.7)                     | 70.7 (64.1 to 76.5) | 0.1                          |
| Sufficient use of fruit and vegetable | Rural       | 16.3 (14.9 to 17.8)                    | 39.9 (36.4 to 43.5) | 68.0 (64.7 to 71.1)                     | 95.8 (94.4 to 96.9) | 100.0                        |
|                                       | Urban       | 22.9 (21.5 to 24.5)                    | 48.4 (44.6 to 52.2) | 76.0 (73.3 to 78.5)                     | 97.2 (96.2 to 97.9) | 100.0                        |
| Non-overweight                        | Rural       | 90.3 (89.1 to 91.3)                    | 87.1 (84.9 to 89.1) | 83.5 (80.5 to 86.1)                     | 73.4 (64.8 to 80.5) | 3.8                          |
|                                       | Urban       | 82.9 (81.5 to 84.1)                    | 78.4 (75.1 to 81.3) | 72.6 (68.6 to 76.3)                     | 59.1 (49.3 to 68.3) | 0.0                          |
| Screening for cervical cancer         | Rural       | NA                                     | 21.4 (18.4 to 24.6) | NA                                      | NA                  | NA                           |
|                                       | Urban       | NA                                     | 28.1 (24.7 to 31.6) | NA                                      | NA                  | NA                           |
| Treatment of diabetes                 | Rural       | 45.0 (37.3 to 53.0)                    | 26.0 (17.3 to 37.1) | 13.2 (4.6 to 29.5)                      | 2.7 (0.3 to 19.5)   | 0.0                          |
|                                       | Urban       | 54.2 (46.9 to 61.3)                    | 47.8 (38.9 to 56.9) | 41.3 (24.2 to 60.5)                     | 29.7 (7.2 to 68.9)  | 0.4                          |
| Treatment of hypertension             | Rural       | 20.9 (19.3 to 22.7)                    | 25.2 (21.5 to 29.3) | 26.5 (20.9 to 32.7)                     | 32.4 (20.4 to 46.8) | 0.0                          |
|                                       | Urban       | 33.7 (31.3 to 36.3)                    | 34.8 (30.6 to 39.3) | 39.8 (33.0 to 46.9)                     | 46.8 (32.4 to 61.5) | 0.0                          |
| Treatment of high cholesterol         | Rural       | NA                                     | 16.0 (11.5 to 22.0) | NA                                      | NA                  | NA                           |
|                                       | Urban       | NA                                     | 31.5 (25.8 to 37.9) | NA                                      | NA                  | NA                           |



**Table S13: Observed, predicted coverage and probability of reaching targets of NCD management in Vietnam by regional levels, 2010–2030**

| Indicators                            | Regional Levels                 | Estimated coverage in percent (95% CI) |                     | Predicted coverage in percent (95% CrI) |                     | Probability reach target (%) |
|---------------------------------------|---------------------------------|----------------------------------------|---------------------|-----------------------------------------|---------------------|------------------------------|
|                                       |                                 | Year 2010                              | Year 2015           | Year 2020                               | Year 2030           |                              |
| Non-use of tobacco                    | Northern Midlands and Mountains | 75.4 (74.0 to 76.8)                    | 80.1 (78.0 to 82.1) | 83.7 (80.9 to 86.3)                     | 89.6 (85.3 to 92.9) | 100.0                        |
|                                       | Red River Delta                 | 74.9 (73.2 to 76.6)                    | 76.7 (73.3 to 79.8) | 79.3 (73.9 to 83.4)                     | 83.2 (72.6 to 89.8) | 74.3                         |
|                                       | North Central and Central Coast | 68.0 (66.7 to 69.3)                    | 78.5 (75.0 to 81.6) | 85.2 (80.7 to 89.0)                     | 93.9 (89.0 to 96.9) | 100.0                        |
|                                       | Central Highlands               | 78.6 (75.4 to 81.5)                    | 80.6 (75.0 to 85.1) | 81.4 (73.0 to 88.3)                     | 84.1 (66.3 to 94.2) | 71.0                         |
|                                       | Southeast                       | 76.3 (74.7 to 77.9)                    | 76.0 (73.5 to 78.3) | 76.4 (72.7 to 79.8)                     | 76.6 (68.3 to 83.5) | 17.3                         |
| Non-harmful use of alcohol            | Mekong River Delta              | 70.8 (68.7 to 72.8)                    | 76.8 (74.0 to 79.3) | 81.3 (73.8 to 86.9)                     | 86.9 (72.5 to 94.3) | 90.4                         |
|                                       | Northern Midlands and Mountains | 80.6 (78.5 to 82.5)                    | 78.6 (75.1 to 81.8) | 75.4 (70.0 to 80.5)                     | 69.5 (56.1 to 80.8) | 3.6                          |
|                                       | Red River Delta                 | 78.0 (75.2 to 80.6)                    | 77.5 (71.9 to 82.2) | 75.8 (67.9 to 82.6)                     | 73.2 (54.5 to 86.6) | 18.2                         |
|                                       | North Central and Central Coast | 78.5 (76.7 to 80.1)                    | 77.2 (71.2 to 82.3) | 75.0 (66.4 to 82.1)                     | 70.9 (51.4 to 85.4) | 12.8                         |
|                                       | Central Highlands               | 76.2 (73.4 to 78.8)                    | 78.2 (66.4 to 86.6) | 77.7 (65.9 to 87.1)                     | 78.6 (52.5 to 93.3) | 44.4                         |
| Sufficient physical activity          | Southeast                       | 84.3 (82.0 to 86.4)                    | 75.6 (71.6 to 79.2) | 65.8 (58.9 to 72.5)                     | 41.9 (27.3 to 59.1) | 0.0                          |
|                                       | Mekong River Delta              | 80.4 (77.6 to 82.8)                    | 73.2 (68.5 to 77.5) | 72.9 (63.2 to 81.6)                     | 64.6 (41.3 to 84.9) | 6.3                          |
|                                       | Northern Midlands and Mountains | 93.3 (91.8 to 94.6)                    | 60.0 (56.2 to 63.7) | 14.0 (11.0 to 17.6)                     | 0.2 (0.1 to 0.3)    | 0.0                          |
|                                       | Red River Delta                 | 68.1 (64.5 to 71.5)                    | 60.9 (54.0 to 67.4) | 53.7 (43.5 to 63.6)                     | 38.5 (20.9 to 59.4) | 0.0                          |
|                                       | North Central and Central Coast | 73.1 (71.3 to 74.9)                    | 79.7 (72.9 to 85.2) | 84.8 (77.2 to 90.4)                     | 91.9 (80.5 to 97.1) | 97.7                         |
| Sufficient use of fruit and vegetable | Central Highlands               | 90.6 (88.0 to 92.6)                    | 71.6 (56.9 to 82.8) | 39.7 (24.3 to 58.9)                     | 4.3 (1.1 to 18.4)   | 0.0                          |
|                                       | Southeast                       | 49.1 (45.9 to 52.3)                    | 70.5 (66.5 to 74.2) | 85.5 (81.8 to 88.6)                     | 97.3 (95.2 to 98.5) | 100.0                        |
|                                       | Mekong River Delta              | 62.9 (60.1 to 65.7)                    | 86.9 (81.9 to 90.6) | 67.7 (17.4 to 95.7)                     | 58.0 (0.8 to 99.6)  | 31.1                         |
|                                       | Northern Midlands and Mountains | 23.3 (20.6 to 26.2)                    | 50.3 (45.5 to 55.0) | 76.7 (72.1 to 80.7)                     | 97.3 (95.5 to 98.3) | 100.0                        |
|                                       | Red River Delta                 | 25.9 (22.9 to 29.2)                    | 42.7 (34.8 to 51.1) | 62.5 (53.0 to 71.1)                     | 88.9 (78.2 to 94.8) | 95.5                         |
| Non-overweight                        | North Central and Central Coast | 11.8 (10.3 to 13.4)                    | 44.7 (37.3 to 52.3) | 82.2 (75.1 to 87.7)                     | 99.4 (98.5 to 99.7) | 100.0                        |
|                                       | Central Highlands               | 6.9 (4.4 to 10.5)                      | 40.7 (25.9 to 57.3) | 85.1 (74.6 to 91.8)                     | 99.8 (99.1 to 99.9) | 100.0                        |
|                                       | Southeast                       | 22.0 (19.3 to 24.9)                    | 41.3 (36.6 to 46.2) | 64.6 (58.2 to 70.4)                     | 92.2 (86.8 to 95.5) | 100.0                        |
|                                       | Mekong River Delta              | 12.4 (10.1 to 15.0)                    | 37.2 (31.9 to 42.8) | 74.6 (56.3 to 87.3)                     | 97.9 (85.5 to 99.7) | 98.5                         |
|                                       | Northern Midlands and Mountains | 93.8 (92.7 to 94.8)                    | 77.4 (73.0 to 81.2) | 44.2 (35.6 to 53.4)                     | 4.0 (1.9 to 8.3)    | 0.0                          |
| Screening for cervical cancer         | Red River Delta                 | 86.9 (84.8 to 88.8)                    | 79.1 (72.3 to 84.6) | 69.0 (56.4 to 79.9)                     | 42.7 (19.2 to 71.1) | 0.2                          |
|                                       | North Central and Central Coast | 92.5 (91.5 to 93.4)                    | 83.1 (77.3 to 87.7) | 66.1 (51.2 to 78.5)                     | 23.7 (8.0 to 52.2)  | 0.0                          |
|                                       | Central Highlands               | 93.3 (91.5 to 94.8)                    | 86.2 (76.7 to 92.2) | 72.4 (50.0 to 88.6)                     | 33.2 (6.5 to 81.6)  | 3.0                          |
|                                       | Southeast                       | 82.0 (79.0 to 84.6)                    | 84.7 (81.3 to 87.6) | 87.2 (82.4 to 91.0)                     | 91.0 (81.8 to 95.9) | 99.0                         |
|                                       | Mekong River Delta              | 85.4 (83.1 to 87.3)                    | 91.4 (88.8 to 93.5) | 76.1 (39.4 to 93.2)                     | 54.0 (3.7 to 96.9)  | 17.8                         |
| Treatment of diabetes                 | Northern Midlands and Mountains | NA                                     | 30.4 (26.3 to 34.9) | NA                                      | NA                  | NA                           |
|                                       | Red River Delta                 | NA                                     | 21.8 (15.7 to 29.4) | NA                                      | NA                  | NA                           |
|                                       | North Central and Central Coast | NA                                     | 21.5 (14.6 to 30.5) | NA                                      | NA                  | NA                           |
|                                       | Central Highlands               | NA                                     | 16.4 (10.2 to 25.3) | NA                                      | NA                  | NA                           |
|                                       | Southeast                       | NA                                     | 25.5 (21.2 to 30.3) | NA                                      | NA                  | NA                           |
| Treatment of hypertension             | Mekong River Delta              | NA                                     | 14.4 (11.0 to 18.6) | NA                                      | NA                  | NA                           |
|                                       | Northern Midlands and Mountains | 28.6 (18.4 to 41.5)                    | 52.8 (41.4 to 63.9) | 71.9 (47.5 to 88.4)                     | 93.8 (57.3 to 99.5) | 84.8                         |
|                                       | Red River Delta                 | 66.7 (52.1 to 78.6)                    | 21.7 (9.7 to 41.9)  | 4.6 (0.6 to 21.3)                       | 0.1 (0.0 to 5.3)    | 0.0                          |
|                                       | North Central and Central Coast | 33.3 (22.9 to 45.6)                    | 45.0 (25.8 to 65.8) | 52.8 (17.8 to 85.6)                     | 69.9 (6.1 to 98.8)  | 37.5                         |
|                                       | Central Highlands               | 39.5 (25.6 to 55.3)                    | 50.0 (15.0 to 85.0) | 42.8 (4.9 to 93.0)                      | 44.5 (0.3 to 99.7)  | 27.9                         |
| Treatment of hypertension             | Southeast                       | 52.3 (40.4 to 64.0)                    | 23.5 (14.0 to 36.8) | 9.4 (2.5 to 26.3)                       | 0.9 (0.0 to 13.1)   | 0.0                          |
|                                       | Mekong River Delta              | 73.0 (61.0 to 82.4)                    | 22.2 (9.0 to 45.2)  | 20.4 (2.1 to 73.1)                      | 6.3 (0.0 to 93.1)   | 5.5                          |
|                                       | Northern Midlands and Mountains | 14.5 (12.4 to 17.0)                    | 35.7 (30.1 to 41.7) | 63.3 (50.3 to 74.8)                     | 94.6 (84.5 to 98.2) | 99.2                         |
|                                       | Red River Delta                 | 19.9 (16.1 to 24.4)                    | 31.8 (23.7 to 41.1) | 45.4 (27.7 to 64.5)                     | 73.4 (34.4 to 93.6) | 32.8                         |
|                                       | North Central and Central Coast | 26.0 (23.1 to 29.2)                    | 32.6 (23.6 to 43.0) | 36.1 (19.9 to 57.3)                     | 47.6 (14.5 to 84.5) | 5.0                          |
| Treatment of hypertension             | Central Highlands               | 16.4 (13.5 to 19.8)                    | 27.3 (15.1 to 44.2) | 47.7 (18.4 to 73.4)                     | 80.3 (19.4 to 97.7) | 50.6                         |
|                                       | Southeast                       | 34.4 (30.3 to 38.7)                    | 28.9 (23.9 to 34.4) | 23.0 (14.8 to 33.9)                     | 14.8 (5.2 to 35.3)  | 0.0                          |

| Indicators                    | Regional Levels                 | Estimated coverage in percent (95% CI) |                     | Predicted coverage in percent (95% CrI) |                    | Probability reach target (%) |
|-------------------------------|---------------------------------|----------------------------------------|---------------------|-----------------------------------------|--------------------|------------------------------|
|                               |                                 | Year 2010                              | Year 2015           | Year 2020                               | Year 2030          |                              |
| Treatment of high cholesterol | Mekong River Delta              | 40.0 (35.9 to 44.2)                    | 16.8 (11.9 to 23.2) | 33.9 (9.9 to 68.9)                      | 45.6 (2.3 to 95.7) | 13.8                         |
|                               | Northern Midlands and Mountains | NA                                     | 35.1 (27.9 to 43.1) | NA                                      | NA                 | NA                           |
|                               | Red River Delta                 | NA                                     | 15.6 (7.7 to 28.8)  | NA                                      | NA                 | NA                           |
|                               | North Central and Central Coast | NA                                     | 27.6 (14.7 to 45.7) | NA                                      | NA                 | NA                           |
|                               | Central Highlands               | NA                                     | 0.0 (0.0 to 29.9)   | NA                                      | NA                 | NA                           |
|                               | Southeast                       | NA                                     | 18.0 (12.2 to 25.8) | NA                                      | NA                 | NA                           |
|                               | Mekong River Delta              | NA                                     | 14.3 (7.4 to 25.7)  | NA                                      | NA                 | NA                           |

**Table S14: Observed, predicted coverage and probability of reaching targets of NCD management in Vietnam by completed wealth quintiles (before imputation), 2010–2030**

| Indicators                            | Wealth Quintiles | Estimated coverage in percent (95% CI) |                     | Predicted coverage in percent (95% CrI) |                     | Probability reach target (%) |
|---------------------------------------|------------------|----------------------------------------|---------------------|-----------------------------------------|---------------------|------------------------------|
|                                       |                  | Year 2010                              | Year 2015           | Year 2020                               | Year 2030           |                              |
| Non-use of tobacco                    | Poorest          | 71.5 (69.1 to 73.7)                    | 72.7 (69.6 to 75.5) | 77.3 (75.3 to 79.2)                     | 82.6 (79.2 to 85.6) | 93.8                         |
|                                       | Poorer           | 73.2 (71.2 to 75.1)                    | 75.7 (72.9 to 78.3) | 79.0 (77.0 to 80.9)                     | 84.0 (80.8 to 86.8) | 99.2                         |
|                                       | Middle           | 72.6 (70.8 to 74.3)                    | 76.4 (73.6 to 78.9) | 78.7 (76.7 to 80.6)                     | 83.8 (80.5 to 86.6) | 98.8                         |
|                                       | Richer           | 76.3 (74.4 to 78.2)                    | 80.4 (78.0 to 82.7) | 81.9 (80.1 to 83.5)                     | 86.3 (83.5 to 88.7) | 100.0                        |
|                                       | Richest          | 79.7 (77.9 to 81.4)                    | 82.2 (79.7 to 84.5) | 84.4 (82.7 to 85.9)                     | 88.3 (85.8 to 90.4) | 100.0                        |
| Non-harmful use of alcohol            | Poorest          | 79.6 (76.5 to 82.4)                    | 73.2 (68.6 to 77.4) | 71.0 (67.1 to 74.7)                     | 60.6 (52.2 to 68.6) | 0.0                          |
|                                       | Poorer           | 81.2 (78.9 to 83.3)                    | 76.0 (72.3 to 79.5) | 72.9 (69.3 to 76.3)                     | 62.8 (54.6 to 70.5) | 0.0                          |
|                                       | Middle           | 79.3 (77.2 to 81.3)                    | 76.4 (71.6 to 80.6) | 71.5 (67.6 to 75.1)                     | 61.1 (52.6 to 69.2) | 0.0                          |
|                                       | Richer           | 79.9 (76.6 to 82.8)                    | 76.9 (72.8 to 80.4) | 72.0 (68.1 to 75.5)                     | 61.7 (53.4 to 69.6) | 0.0                          |
|                                       | Richest          | 75.8 (71.2 to 79.9)                    | 78.3 (74.5 to 81.6) | 70.7 (66.8 to 74.4)                     | 60.3 (52.2 to 68.0) | 0.0                          |
| Sufficient physical activity          | Poorest          | 78.3 (75.4 to 81.0)                    | 82.0 (77.2 to 86.0) | 79.8 (76.7 to 82.5)                     | 83.3 (78.2 to 87.4) | 90.7                         |
|                                       | Poorer           | 77.3 (74.8 to 79.6)                    | 72.8 (68.9 to 76.4) | 77.3 (74.3 to 80.1)                     | 81.2 (75.8 to 85.7) | 68.0                         |
|                                       | Middle           | 72.9 (70.4 to 75.4)                    | 68.8 (63.5 to 73.7) | 73.5 (69.9 to 77.1)                     | 77.9 (71.5 to 83.2) | 23.0                         |
|                                       | Richer           | 68.7 (65.9 to 71.4)                    | 67.6 (63.3 to 71.7) | 70.0 (66.3 to 73.5)                     | 74.7 (68.1 to 80.4) | 3.6                          |
|                                       | Richest          | 62.9 (57.5 to 68.0)                    | 63.6 (59.0 to 67.9) | 65.8 (61.9 to 69.5)                     | 70.9 (64.1 to 76.9) | 0.1                          |
| Sufficient use of fruit and vegetable | Poorest          | 10.0 (8.2 to 12.1)                     | 25.4 (21.0 to 30.2) | 54.1 (49.6 to 58.6)                     | 93.1 (90.7 to 94.9) | 100.0                        |
|                                       | Poorer           | 13.8 (11.9 to 15.9)                    | 37.2 (32.8 to 41.8) | 64.5 (60.6 to 68.1)                     | 95.4 (93.8 to 96.6) | 100.0                        |
|                                       | Middle           | 18.3 (16.4 to 20.2)                    | 42.3 (37.6 to 47.2) | 70.9 (67.2 to 74.5)                     | 96.5 (95.2 to 97.5) | 100.0                        |
|                                       | Richer           | 25.5 (23.2 to 27.9)                    | 53.7 (48.6 to 58.8) | 78.8 (75.9 to 81.5)                     | 97.7 (96.8 to 98.3) | 100.0                        |
|                                       | Richest          | 37.8 (33.1 to 42.8)                    | 57.2 (52.5 to 61.7) | 84.0 (81.7 to 86.1)                     | 98.4 (97.8 to 98.8) | 100.0                        |
| Non-overweight                        | Poorest          | 91.0 (88.5 to 93.0)                    | 89.5 (86.5 to 91.8) | 85.3 (82.2 to 88.1)                     | 76.7 (67.9 to 83.8) | 19.9                         |
|                                       | Poorer           | 90.4 (88.7 to 91.8)                    | 84.8 (81.3 to 87.7) | 83.4 (80.0 to 86.3)                     | 73.9 (64.7 to 81.6) | 6.7                          |
|                                       | Middle           | 87.4 (85.3 to 89.2)                    | 85.1 (80.7 to 88.6) | 80.0 (76.0 to 83.6)                     | 69.3 (59.0 to 78.2) | 0.8                          |
|                                       | Richer           | 87.5 (85.5 to 89.2)                    | 84.3 (80.3 to 87.6) | 79.4 (75.2 to 83.0)                     | 68.5 (58.2 to 77.5) | 0.5                          |
|                                       | Richest          | 80.6 (76.0 to 84.6)                    | 77.4 (72.7 to 81.5) | 71.2 (66.4 to 75.7)                     | 58.3 (47.7 to 68.4) | 0.0                          |
| Screening for cervical cancer         | Poorest          | NA                                     | 11.3 (7.8 to 16.1)  | NA                                      | NA                  | NA                           |
|                                       | Poorer           | NA                                     | 18.1 (14.5 to 22.5) | NA                                      | NA                  | NA                           |
|                                       | Middle           | NA                                     | 24.6 (19.1 to 31.1) | NA                                      | NA                  | NA                           |
|                                       | Richer           | NA                                     | 29.7 (24.4 to 35.6) | NA                                      | NA                  | NA                           |
|                                       | Richest          | NA                                     | 36.5 (31.2 to 42.2) | NA                                      | NA                  | NA                           |
| Treatment of diabetes                 | Poorest          | 33.9 (22.9 to 47.0)                    | 22.6 (11.4 to 39.8) | 17.0 (8.2 to 31.4)                      | 6.8 (1.5 to 24.7)   | 0.0                          |
|                                       | Poorer           | 50.8 (38.8 to 62.7)                    | 35.0 (22.1 to 50.5) | 26.5 (14.5 to 43.2)                     | 11.3 (2.8 to 35.6)  | 0.0                          |
|                                       | Middle           | 42.9 (30.8 to 55.9)                    | 48.4 (32.0 to 65.2) | 27.2 (14.1 to 45.2)                     | 11.7 (2.7 to 37.2)  | 0.0                          |
|                                       | Richer           | 54.5 (41.5 to 67.0)                    | 57.1 (40.9 to 72.0) | 36.1 (20.6 to 54.8)                     | 16.7 (4.3 to 46.5)  | 0.0                          |
|                                       | Richest          | 75.0 (53.1 to 88.8)                    | 37.3 (25.3 to 51.0) | 32.5 (19.2 to 49.0)                     | 14.5 (4.1 to 39.7)  | 0.0                          |
| Treatment of hypertension             | Poorest          | 24.5 (21.4 to 27.8)                    | 25.0 (19.7 to 31.2) | 30.0 (23.5 to 37.3)                     | 36.4 (23.1 to 51.9) | 0.0                          |
|                                       | Poorer           | 25.9 (22.9 to 29.1)                    | 23.9 (18.9 to 29.6) | 31.0 (24.4 to 38.5)                     | 37.4 (23.9 to 53.1) | 0.0                          |
|                                       | Middle           | 24.3 (21.5 to 27.4)                    | 29.7 (23.0 to 37.5) | 31.3 (24.2 to 39.2)                     | 37.7 (23.7 to 53.9) | 0.0                          |
|                                       | Richer           | 24.0 (20.4 to 28.0)                    | 34.5 (27.3 to 42.4) | 32.0 (25.0 to 39.7)                     | 38.5 (24.6 to 54.3) | 0.0                          |
|                                       | Richest          | 27.6 (21.3 to 34.9)                    | 36.5 (29.8 to 43.7) | 37.3 (29.8 to 45.3)                     | 44.1 (29.8 to 59.3) | 0.0                          |
| Treatment of high cholesterol         | Poorest          | NA                                     | 13.0 (6.4 to 24.4)  | NA                                      | NA                  | NA                           |
|                                       | Poorer           | NA                                     | 17.8 (11.2 to 26.9) | NA                                      | NA                  | NA                           |
|                                       | Middle           | NA                                     | 15.2 (8.4 to 25.7)  | NA                                      | NA                  | NA                           |
|                                       | Richer           | NA                                     | 27.7 (19.2 to 38.2) | NA                                      | NA                  | NA                           |
|                                       | Richest          | NA                                     | 37.1 (28.8 to 46.1) | NA                                      | NA                  | NA                           |

**Table S15: Observed, predicted coverage and probability of reaching targets of NCD management in Vietnam by imputed wealth quintiles (after imputation), 2010–2030**

| Indicators                            | Wealth Quintiles | Estimated coverage in percent (95% CI) |                     | Predicted coverage in percent (95% CrI) |                     | Probability reach target (%) |
|---------------------------------------|------------------|----------------------------------------|---------------------|-----------------------------------------|---------------------|------------------------------|
|                                       |                  | Year 2010                              | Year 2015           | Year 2020                               | Year 2030           |                              |
| Non-use of tobacco                    | Poorest          | 71.5 (70.2 to 72.8)                    | 72.7 (70.7 to 74.7) | 77.3 (75.3 to 79.2)                     | 82.6 (79.2 to 85.6) | 93.8                         |
|                                       | Poorer           | 73.0 (71.7 to 74.3)                    | 75.7 (73.6 to 77.8) | 79.0 (77.0 to 80.9)                     | 84.0 (80.8 to 86.8) | 99.2                         |
|                                       | Middle           | 72.4 (71.2 to 73.6)                    | 76.3 (74.4 to 78.3) | 78.7 (76.7 to 80.6)                     | 83.8 (80.5 to 86.6) | 98.8                         |
|                                       | Richer           | 75.9 (74.6 to 77.2)                    | 80.4 (78.6 to 82.3) | 81.9 (80.1 to 83.5)                     | 86.3 (83.5 to 88.7) | 100.0                        |
|                                       | Richest          | 79.3 (77.9 to 80.8)                    | 82.2 (80.5 to 84.0) | 84.4 (82.7 to 85.9)                     | 88.3 (85.8 to 90.4) | 100.0                        |
| Non-harmful use of alcohol            | Poorest          | 80.1 (78.1 to 82.1)                    | 73.2 (70.1 to 76.4) | 71.0 (67.1 to 74.7)                     | 60.6 (52.2 to 68.6) | 0.0                          |
|                                       | Poorer           | 81.4 (79.9 to 82.8)                    | 76.1 (73.3 to 78.8) | 72.9 (69.3 to 76.3)                     | 62.8 (58.2 to 70.5) | 0.0                          |
|                                       | Middle           | 79.9 (78.4 to 81.3)                    | 76.4 (72.9 to 79.8) | 71.5 (67.6 to 75.1)                     | 61.1 (52.6 to 69.2) | 0.0                          |
|                                       | Richer           | 80.2 (78.4 to 82.0)                    | 76.8 (73.7 to 80.0) | 72.0 (68.1 to 75.5)                     | 61.7 (53.4 to 69.6) | 0.0                          |
|                                       | Richest          | 76.8 (73.5 to 80.2)                    | 78.3 (75.3 to 81.2) | 70.7 (66.8 to 74.4)                     | 60.3 (52.2 to 68.0) | 0.0                          |
| Sufficient physical activity          | Poorest          | 74.7 (72.4 to 76.9)                    | 82.0 (79.3 to 84.7) | 79.8 (76.7 to 82.5)                     | 83.3 (78.2 to 87.4) | 90.7                         |
|                                       | Poorer           | 73.5 (71.7 to 75.3)                    | 72.9 (70.0 to 75.7) | 77.3 (74.3 to 80.1)                     | 81.2 (75.8 to 85.7) | 68.0                         |
|                                       | Middle           | 69.0 (66.9 to 71.1)                    | 68.8 (65.0 to 72.6) | 73.5 (69.9 to 77.1)                     | 77.9 (71.5 to 83.2) | 23.0                         |
|                                       | Richer           | 64.8 (62.4 to 67.2)                    | 67.6 (64.1 to 71.0) | 70.0 (66.3 to 73.5)                     | 74.7 (68.1 to 80.4) | 3.6                          |
|                                       | Richest          | 60.0 (55.7 to 64.3)                    | 63.5 (60.1 to 66.9) | 65.8 (61.9 to 69.5)                     | 70.9 (64.1 to 76.9) | 0.1                          |
| Sufficient use of fruit and vegetable | Poorest          | 9.5 (8.0 to 11.0)                      | 25.4 (22.3 to 28.5) | 54.1 (49.6 to 58.6)                     | 93.1 (90.7 to 94.9) | 100.0                        |
|                                       | Poorer           | 13.2 (11.7 to 14.7)                    | 37.2 (34.1 to 40.3) | 64.5 (60.6 to 68.1)                     | 95.4 (93.8 to 96.6) | 100.0                        |
|                                       | Middle           | 17.6 (16.0 to 19.1)                    | 42.4 (38.4 to 46.4) | 70.9 (67.2 to 74.5)                     | 96.5 (95.2 to 97.5) | 100.0                        |
|                                       | Richer           | 24.3 (22.3 to 26.3)                    | 53.7 (50.0 to 57.4) | 78.8 (75.9 to 81.5)                     | 97.7 (96.8 to 98.3) | 100.0                        |
|                                       | Richest          | 34.7 (31.2 to 38.1)                    | 57.1 (53.6 to 60.6) | 84.0 (81.7 to 86.1)                     | 98.4 (97.8 to 98.8) | 100.0                        |
| Non-overweight                        | Poorest          | 90.9 (89.7 to 92.2)                    | 89.4 (87.1 to 91.8) | 85.3 (82.2 to 88.1)                     | 76.7 (67.9 to 83.8) | 19.9                         |
|                                       | Poorer           | 90.3 (89.1 to 91.5)                    | 84.8 (82.3 to 87.3) | 83.4 (80.0 to 86.3)                     | 73.9 (64.7 to 81.6) | 6.7                          |
|                                       | Middle           | 87.5 (86.4 to 88.6)                    | 85.0 (81.8 to 88.2) | 80.0 (76.0 to 83.6)                     | 69.3 (59.0 to 78.2) | 0.8                          |
|                                       | Richer           | 87.0 (85.5 to 88.5)                    | 84.2 (81.2 to 87.3) | 79.4 (75.2 to 83.0)                     | 68.5 (58.2 to 77.5) | 0.5                          |
|                                       | Richest          | 80.9 (78.0 to 83.8)                    | 77.4 (73.8 to 81.0) | 71.2 (66.4 to 75.7)                     | 58.3 (47.7 to 68.4) | 0.0                          |
| Screening for cervical cancer         | Poorest          | NA                                     | 11.2 (8.3 to 14.1)  | NA                                      | NA                  | NA                           |
|                                       | Poorer           | NA                                     | 18.2 (15.0 to 21.5) | NA                                      | NA                  | NA                           |
|                                       | Middle           | NA                                     | 24.5 (19.7 to 29.3) | NA                                      | NA                  | NA                           |
|                                       | Richer           | NA                                     | 29.7 (25.1 to 34.3) | NA                                      | NA                  | NA                           |
|                                       | Richest          | NA                                     | 36.4 (31.8 to 41.1) | NA                                      | NA                  | NA                           |
| Treatment of diabetes                 | Poorest          | 38.2 (25.6 to 50.8)                    | 22.6 (7.9 to 37.3)  | 17.0 (8.2 to 31.4)                      | 6.8 (1.5 to 24.7)   | 0.0                          |
|                                       | Poorer           | 51.8 (40.5 to 63.2)                    | 35.0 (20.2 to 49.8) | 26.5 (14.5 to 43.2)                     | 11.3 (2.8 to 35.6)  | 0.0                          |
|                                       | Middle           | 47.5 (34.7 to 60.3)                    | 48.4 (30.8 to 66.0) | 27.2 (14.1 to 45.2)                     | 11.7 (2.7 to 37.2)  | 0.0                          |
|                                       | Richer           | 57.1 (44.2 to 70.1)                    | 57.1 (40.7 to 73.5) | 36.1 (20.6 to 54.8)                     | 16.7 (4.3 to 46.5)  | 0.0                          |
|                                       | Richest          | 72.3 (52.4 to 92.2)                    | 37.3 (24.0 to 50.5) | 32.5 (19.2 to 49.0)                     | 14.5 (4.1 to 39.7)  | 0.0                          |
| Treatment of hypertension             | Poorest          | 24.9 (21.5 to 28.3)                    | 25.0 (19.2 to 30.8) | 30.0 (23.5 to 37.3)                     | 36.4 (23.1 to 51.9) | 0.0                          |
|                                       | Poorer           | 26.3 (22.8 to 29.9)                    | 23.9 (18.5 to 29.2) | 31.0 (24.4 to 38.5)                     | 37.4 (23.9 to 53.1) | 0.0                          |
|                                       | Middle           | 25.3 (21.9 to 28.7)                    | 29.7 (22.4 to 37.1) | 31.3 (24.2 to 39.2)                     | 37.7 (23.7 to 53.9) | 0.0                          |
|                                       | Richer           | 24.8 (20.9 to 28.6)                    | 34.5 (26.8 to 42.1) | 32.0 (25.0 to 39.7)                     | 38.5 (24.6 to 54.3) | 0.0                          |
|                                       | Richest          | 28.7 (21.4 to 35.9)                    | 36.5 (29.5 to 43.5) | 37.3 (29.8 to 45.3)                     | 44.1 (29.8 to 59.3) | 0.0                          |
| Treatment of high cholesterol         | Poorest          | NA                                     | 13.0 (4.0 to 21.9)  | NA                                      | NA                  | NA                           |
|                                       | Poorer           | NA                                     | 17.8 (9.9 to 25.7)  | NA                                      | NA                  | NA                           |
|                                       | Middle           | NA                                     | 15.2 (6.5 to 23.8)  | NA                                      | NA                  | NA                           |
|                                       | Richer           | NA                                     | 27.7 (18.1 to 37.3) | NA                                      | NA                  | NA                           |
|                                       | Richest          | NA                                     | 37.1 (28.3 to 45.9) | NA                                      | NA                  | NA                           |

**Table S16: Observed, predicted coverage and probability of reaching targets of NCD management in Vietnam by educational levels, 2010–2030**

| Indicators                            | Education Levels      | Estimated coverage in percent (95% CI) |                     | Predicted coverage in percent (95% CrI) |                     | Probability reach target (%) |
|---------------------------------------|-----------------------|----------------------------------------|---------------------|-----------------------------------------|---------------------|------------------------------|
|                                       |                       | Year 2010                              | Year 2015           | Year 2020                               | Year 2030           |                              |
| Non-use of tobacco                    | Lower than primary    | 74.7 (72.9 to 76.5)                    | 75.1 (72.0 to 77.9) | 75.4 (70.9 to 79.5)                     | 76.0 (66.3 to 83.8) | 17.0                         |
|                                       | Primary school        | 76.0 (73.9 to 78.0)                    | 79.4 (76.4 to 82.1) | 82.3 (78.1 to 85.9)                     | 87.3 (79.7 to 92.3) | 96.9                         |
|                                       | Secondary school      | 70.8 (69.2 to 72.4)                    | 73.2 (70.2 to 76.0) | 75.4 (71.3 to 79.2)                     | 79.6 (71.3 to 85.9) | 44.9                         |
|                                       | Highschool            | 74.8 (73.3 to 76.3)                    | 78.0 (75.9 to 79.9) | 80.8 (77.8 to 83.6)                     | 85.7 (80.2 to 89.9) | 98.0                         |
|                                       | University and higher | 77.3 (75.2 to 79.4)                    | 82.7 (80.1 to 85.1) | 87.1 (83.6 to 90.0)                     | 93.1 (88.2 to 96.1) | 100.0                        |
| Non-harmful use of alcohol            | Lower than primary    | 85.1 (82.8 to 87.1)                    | 75.7 (71.6 to 79.5) | 63.2 (54.5 to 71.3)                     | 34.1 (19.7 to 52.3) | 0.0                          |
|                                       | Primary school        | 80.2 (77.1 to 83.0)                    | 78.6 (73.9 to 82.6) | 76.7 (69.1 to 83.4)                     | 72.6 (54.0 to 86.5) | 17.9                         |
|                                       | Secondary school      | 79.3 (77.4 to 81.0)                    | 76.9 (72.9 to 80.5) | 74.3 (67.2 to 80.2)                     | 68.6 (51.8 to 81.4) | 4.3                          |
|                                       | Highschool            | 77.5 (75.3 to 79.5)                    | 74.3 (70.6 to 77.7) | 70.8 (64.7 to 76.5)                     | 63.2 (49.1 to 75.9) | 0.3                          |
|                                       | University and higher | 79.6 (76.7 to 82.3)                    | 75.9 (71.4 to 79.9) | 71.7 (63.6 to 78.8)                     | 62.2 (42.9 to 78.7) | 1.7                          |
| Sufficient physical activity          | Lower than primary    | 69.6 (67.0 to 72.2)                    | 74.2 (69.2 to 78.6) | 78.4 (71.7 to 83.9)                     | 85.1 (73.1 to 92.3) | 82.4                         |
|                                       | Primary school        | 62.5 (58.9 to 66.0)                    | 68.1 (62.9 to 72.8) | 73.0 (65.6 to 79.4)                     | 81.4 (67.9 to 90.3) | 60.3                         |
|                                       | Secondary school      | 73.1 (70.7 to 75.4)                    | 71.9 (67.8 to 75.7) | 70.7 (63.8 to 76.7)                     | 68.1 (52.4 to 80.2) | 2.8                          |
|                                       | Highschool            | 73.9 (71.6 to 76.1)                    | 76.0 (72.7 to 79.1) | 78.1 (72.7 to 82.7)                     | 81.8 (71.1 to 89.1) | 65.1                         |
|                                       | University and higher | 56.9 (53.3 to 60.4)                    | 63.1 (58.2 to 67.8) | 68.9 (61.6 to 75.7)                     | 78.8 (65.0 to 88.3) | 41.3                         |
| Sufficient use of fruit and vegetable | Lower than primary    | 9.8 (8.1 to 11.7)                      | 27.3 (23.1 to 31.9) | 53.7 (49.7 to 57.9)                     | 92.4 (90.0 to 94.3) | 100.0                        |
|                                       | Primary school        | 23.8 (20.6 to 27.2)                    | 46.8 (41.4 to 52.2) | 75.7 (72.8 to 78.6)                     | 97.0 (96.1 to 97.8) | 100.0                        |
|                                       | Secondary school      | 15.0 (12.9 to 17.3)                    | 36.5 (32.5 to 40.6) | 64.9 (61.4 to 68.4)                     | 95.1 (93.5 to 96.4) | 100.0                        |
|                                       | Highschool            | 17.8 (15.7 to 20.0)                    | 44.0 (39.7 to 48.5) | 70.1 (66.9 to 73.3)                     | 96.1 (94.8 to 97.1) | 100.0                        |
|                                       | University and higher | 33.5 (30.3 to 36.9)                    | 59.6 (54.0 to 64.9) | 83.7 (81.5 to 85.8)                     | 98.2 (97.6 to 98.7) | 100.0                        |
| Non-overweight                        | Lower than primary    | 88.1 (86.0 to 89.9)                    | 84.1 (79.9 to 87.6) | 79.0 (70.7 to 86.0)                     | 65.4 (42.5 to 84.2) | 7.2                          |
|                                       | Primary school        | 85.0 (82.4 to 87.4)                    | 86.6 (82.3 to 90.0) | 88.0 (81.3 to 92.8)                     | 90.4 (76.0 to 96.8) | 93.8                         |
|                                       | Secondary school      | 88.8 (87.1 to 90.3)                    | 78.4 (74.5 to 81.8) | 62.2 (52.7 to 70.8)                     | 25.5 (13.2 to 43.2) | 0.0                          |
|                                       | Highschool            | 90.8 (89.3 to 92.1)                    | 89.1 (86.4 to 91.4) | 87.4 (81.8 to 91.6)                     | 83.0 (66.7 to 92.6) | 66.2                         |
|                                       | University and higher | 83.6 (80.7 to 86.2)                    | 82.9 (78.4 to 86.7) | 82.1 (73.8 to 88.4)                     | 80.5 (60.2 to 92.5) | 52.2                         |
| Screening for cervical cancer         | Lower than primary    | NA                                     | 18.5 (14.3 to 23.6) | NA                                      | NA                  | NA                           |
|                                       | Primary school        | NA                                     | 22.8 (17.6 to 28.9) | NA                                      | NA                  | NA                           |
|                                       | Secondary school      | NA                                     | 23.7 (19.0 to 29.1) | NA                                      | NA                  | NA                           |
|                                       | Highschool            | NA                                     | 21.3 (17.6 to 25.6) | NA                                      | NA                  | NA                           |
|                                       | University and higher | NA                                     | 34.2 (28.5 to 40.3) | NA                                      | NA                  | NA                           |
| Treatment of diabetes                 | Lower than primary    | 57.1 (46.5 to 67.2)                    | 36.4 (23.8 to 51.1) | 32.2 (19.3 to 49.1)                     | 16.3 (4.6 to 44.0)  | 0.0                          |
|                                       | Primary school        | 41.0 (27.1 to 56.6)                    | 30.6 (18.0 to 46.9) | 22.0 (11.8 to 37.0)                     | 10.4 (2.8 to 31.3)  | 0.0                          |
|                                       | Secondary school      | 52.2 (40.6 to 63.5)                    | 43.8 (28.2 to 60.7) | 31.7 (17.9 to 48.5)                     | 16.0 (4.3 to 42.9)  | 0.0                          |
|                                       | Highschool            | 47.5 (36.9 to 58.3)                    | 38.1 (25.0 to 53.2) | 27.5 (15.8 to 43.2)                     | 13.5 (3.7 to 37.6)  | 0.0                          |
|                                       | University and higher | 50.9 (38.3 to 63.4)                    | 50.0 (34.1 to 65.9) | 33.2 (18.9 to 50.2)                     | 17.1 (4.6 to 45.0)  | 0.0                          |
| Treatment of hypertension             | Lower than primary    | 34.7 (31.7 to 37.9)                    | 26.4 (21.0 to 32.6) | 19.3 (11.1 to 30.4)                     | 9.8 (2.8 to 26.9)   | 0.0                          |
|                                       | Primary school        | 27.4 (23.3 to 32.0)                    | 28.6 (21.6 to 36.8) | 29.1 (15.8 to 47.6)                     | 31.2 (7.9 to 69.9)  | 0.4                          |
|                                       | Secondary school      | 22.1 (19.5 to 24.9)                    | 31.0 (25.0 to 37.7) | 41.7 (27.4 to 56.5)                     | 64.6 (32.5 to 86.4) | 10.7                         |
|                                       | Highschool            | 17.9 (15.6 to 20.5)                    | 30.1 (24.7 to 36.2) | 46.1 (32.3 to 59.8)                     | 77.1 (49.8 to 91.6) | 38.6                         |
|                                       | University and higher | 27.1 (23.1 to 31.5)                    | 28.6 (21.7 to 36.5) | 29.9 (16.1 to 46.8)                     | 32.8 (8.7 to 69.3)  | 0.5                          |
| Treatment of high cholesterol         | Lower than primary    | NA                                     | 13.3 (7.4 to 22.8)  | NA                                      | NA                  | NA                           |
|                                       | Primary school        | NA                                     | 27.9 (18.7 to 39.6) | NA                                      | NA                  | NA                           |
|                                       | Secondary school      | NA                                     | 19.2 (12.0 to 29.3) | NA                                      | NA                  | NA                           |
|                                       | Highschool            | NA                                     | 25.2 (17.8 to 34.4) | NA                                      | NA                  | NA                           |
|                                       | University and higher | NA                                     | 32.9 (23.9 to 43.5) | NA                                      | NA                  | NA                           |

**Table S17: Sensitivity analysis of composite methods in observed, predicted coverage and probability of reaching targets by genders, 2010–2030**

| Indicators                      | Genders | Estimated coverage in percent (95% CI) |                     | Predicted coverage in percent (95% CrI) |                     | Probability reach target (%) |
|---------------------------------|---------|----------------------------------------|---------------------|-----------------------------------------|---------------------|------------------------------|
|                                 |         | Year 2010                              | Year 2015           | Year 2020                               | Year 2030           |                              |
| Composite Prevention (mega)     | Women   | 77.4 (76.4 to 78.3)                    | 83.1 (81.4 to 84.7) | 86.7 (84.7 to 88.5)                     | 92.5 (89.9 to 94.5) | 100.0                        |
|                                 | Men     | 49.4 (48.2 to 50.6)                    | 56.5 (54.1 to 58.9) | 64.8 (61.2 to 68.3)                     | 77.6 (71.6 to 82.7) | 18.1                         |
| Composite Treatment (mega)      | Women   | 61.8 (54.7 to 68.4)                    | 52.5 (42.8 to 61.9) | 50.1 (34.8 to 65.9)                     | 40.0 (14.8 to 72.3) | 0.4                          |
|                                 | Men     | 50.4 (42.2 to 58.5)                    | 50.6 (40.3 to 60.8) | 42.2 (27.9 to 57.7)                     | 32.6 (11.4 to 64.8) | 0.1                          |
| Composite Coverage (mega)       | Women   | 70.7 (63.9 to 76.7)                    | 71.3 (61.8 to 79.2) | 74.1 (58.9 to 85.7)                     | 77.9 (45.3 to 94.0) | 43.2                         |
|                                 | Men     | 49.6 (41.5 to 57.8)                    | 54.0 (43.6 to 64.1) | 55.4 (38.4 to 71.6)                     | 60.2 (26.5 to 86.9) | 9.5                          |
| Composite Prevention (a.mean)   | Women   | 70.6 (69.5 to 71.6)                    | 77.3 (75.4 to 79.0) | 82.9 (79.7 to 85.9)                     | 90.7 (86.2 to 94.0) | 100.0                        |
|                                 | Men     | 49.9 (48.7 to 51.1)                    | 56.1 (53.7 to 58.5) | 62.1 (57.3 to 66.6)                     | 73.0 (64.1 to 80.2) | 2.7                          |
| Composite Treatment (a.mean)    | Women   | 59.7 (52.6 to 66.4)                    | 51.5 (41.9 to 61.0) | 49.7 (34.2 to 65.3)                     | 41.4 (15.4 to 72.7) | 0.7                          |
|                                 | Men     | 49.6 (41.5 to 57.8)                    | 50.6 (40.3 to 60.8) | 43.1 (28.3 to 59.0)                     | 35.2 (12.2 to 67.7) | 0.1                          |
| Composite Coverage (a.mean)     | Women   | 66.0 (59.0 to 72.3)                    | 66.3 (56.7 to 74.8) | 69.3 (54.1 to 81.4)                     | 72.9 (40.6 to 91.6) | 29.0                         |
|                                 | Men     | 49.6 (41.5 to 57.8)                    | 54.0 (43.6 to 64.1) | 54.7 (38.6 to 70.2)                     | 59.1 (26.6 to 85.2) | 7.6                          |
| Composite Prevention (geo.mean) | Women   | 58.7 (57.6 to 59.8)                    | 74.0 (72.1 to 75.8) | 85.1 (82.3 to 87.4)                     | 95.8 (93.7 to 97.2) | 100.0                        |
|                                 | Men     | 44.4 (43.2 to 45.6)                    | 54.1 (51.7 to 56.5) | 63.5 (58.8 to 68.0)                     | 79.1 (71.4 to 85.1) | 39.9                         |
| Composite Treatment (geo.mean)  | Women   | 55.5 (48.4 to 62.4)                    | 47.5 (38.1 to 57.2) | 39.7 (21.6 to 60.5)                     | 25.9 (5.2 to 67.8)  | 0.4                          |
|                                 | Men     | 41.0 (33.2 to 49.3)                    | 43.7 (33.7 to 54.1) | 46.6 (26.3 to 68.5)                     | 52.4 (13.8 to 88.9) | 10.1                         |
| Composite Coverage (geo.mean)   | Women   | 57.6 (50.5 to 64.4)                    | 61.4 (51.6 to 70.3) | 66.9 (51.1 to 79.9)                     | 75.1 (43.2 to 92.5) | 34.6                         |
|                                 | Men     | 43.2 (35.2 to 51.5)                    | 49.4 (39.2 to 59.7) | 53.7 (37.6 to 69.2)                     | 63.7 (31.2 to 87.3) | 11.7                         |

Note: meta=Meta-analysis random effects; a.mean=Arithmetic Means; geo.mean=Geometric Means

**Table S18: Sensitivity analysis of composite methods in observed, predicted coverage and probability of reaching targets by ethnic groups, 2010–2030**

| Indicators                      | Ethnic Levels       | Estimated coverage in percent (95% CI) |                     | Predicted coverage in percent (95% CrI) |                     | Probability reach target (%) |
|---------------------------------|---------------------|----------------------------------------|---------------------|-----------------------------------------|---------------------|------------------------------|
|                                 |                     | Year 2010                              | Year 2015           | Year 2020                               | Year 2030           |                              |
| Composite Prevention (mega)     | Minorities (Others) | 66.0 (64.1 to 67.9)                    | 68.3 (64.5 to 71.8) | 70.5 (63.2 to 76.9)                     | 74.7 (59.8 to 85.4) | 19.5                         |
|                                 | Majority (Kinh)     | 60.4 (59.6 to 61.3)                    | 67.4 (65.7 to 69.0) | 73.6 (70.5 to 76.6)                     | 83.7 (78.8 to 87.6) | 93.2                         |
| Composite Treatment (mega)      | Minorities (Others) | 42.9 (28.0 to 59.1)                    | 43.1 (37.0 to 49.4) | 39.3 (29.1 to 50.6)                     | 33.1 (14.3 to 59.1) | 0.0                          |
|                                 | Majority (Kinh)     | 57.7 (52.0 to 63.3)                    | 53.4 (45.7 to 60.9) | 50.9 (36.2 to 64.7)                     | 44.2 (18.3 to 72.8) | 0.5                          |
| Composite Coverage (mega)       | Minorities (Others) | 57.1 (40.9 to 72.0)                    | 58.4 (54.2 to 62.4) | 60.3 (50.5 to 69.4)                     | 64.2 (38.1 to 83.8) | 6.2                          |
|                                 | Majority (Kinh)     | 59.1 (53.4 to 64.6)                    | 61.3 (53.7 to 68.5) | 63.0 (48.7 to 75.8)                     | 66.7 (36.5 to 87.9) | 13.3                         |
| Composite Prevention (a.mean)   | Minorities (Others) | 64.8 (62.8 to 66.7)                    | 66.8 (63.1 to 70.4) | 68.7 (61.4 to 75.4)                     | 72.5 (57.1 to 83.8) | 11.7                         |
|                                 | Majority (Kinh)     | 60.2 (59.4 to 61.1)                    | 66.9 (65.2 to 68.5) | 73.0 (69.8 to 75.9)                     | 82.8 (77.7 to 86.9) | 87.2                         |
| Composite Treatment (a.mean)    | Minorities (Others) | 42.9 (28.0 to 59.1)                    | 41.8 (35.8 to 48.2) | 38.2 (28.5 to 49.2)                     | 31.7 (13.9 to 58.1) | 0.0                          |
|                                 | Majority (Kinh)     | 56.4 (50.6 to 61.9)                    | 52.1 (44.5 to 59.7) | 49.1 (35.2 to 63.5)                     | 42.2 (17.7 to 71.7) | 0.4                          |
| Composite Coverage (a.mean)     | Minorities (Others) | 54.3 (38.2 to 69.5)                    | 56.2 (52.1 to 60.3) | 58.5 (48.8 to 67.7)                     | 62.8 (38.1 to 83.0) | 5.3                          |
|                                 | Majority (Kinh)     | 58.4 (52.7 to 63.9)                    | 60.7 (53.1 to 67.9) | 62.8 (48.5 to 75.7)                     | 66.8 (37.3 to 87.9) | 13.8                         |
| Composite Prevention (geo.mean) | Minorities (Others) | 56.2 (54.2 to 58.2)                    | 62.4 (58.5 to 66.1) | 68.3 (61.0 to 74.9)                     | 78.2 (65.2 to 87.7) | 37.8                         |
|                                 | Majority (Kinh)     | 52.2 (51.3 to 53.1)                    | 65.4 (63.7 to 67.0) | 76.6 (73.8 to 79.2)                     | 90.8 (87.7 to 93.1) | 100.0                        |
| Composite Treatment (geo.mean)  | Minorities (Others) | 31.4 (18.6 to 48.0)                    | 31.0 (25.4 to 37.1) | 28.9 (20.3 to 38.9)                     | 25.1 (10.2 to 49.9) | 0.0                          |
|                                 | Majority (Kinh)     | 50.5 (44.8 to 56.2)                    | 47.9 (40.3 to 55.5) | 45.9 (32.0 to 60.5)                     | 41.6 (16.9 to 71.0) | 0.4                          |
| Composite Coverage (geo.mean)   | Minorities (Others) | 42.9 (28.0 to 59.1)                    | 46.3 (42.2 to 50.5) | 51.5 (41.7 to 61.3)                     | 61.6 (35.1 to 82.2) | 4.3                          |
|                                 | Majority (Kinh)     | 51.5 (45.8 to 57.2)                    | 57.1 (49.4 to 64.4) | 61.7 (47.0 to 74.4)                     | 70.9 (40.0 to 89.6) | 21.8                         |

Note: meta=Meta-analysis random effects; a.mean=Arithmetic Means; geo.mean=Geometric Means

**Table S19: Sensitivity analysis of composite methods in observed, predicted coverage and probability of reaching targets by living areas, 2010–2030**

| Indicators                      | Living Area | Estimated coverage in percent (95% CI) |                     | Predicted coverage in percent (95% CrI) |                     | Probability reach target (%) |
|---------------------------------|-------------|----------------------------------------|---------------------|-----------------------------------------|---------------------|------------------------------|
|                                 |             | Year 2010                              | Year 2015           | Year 2020                               | Year 2030           |                              |
| Composite Prevention (mega)     | Rural       | 60.6 (59.6 to 61.6)                    | 67.5 (65.3 to 69.5) | 73.7 (70.8 to 76.3)                     | 83.6 (79.2 to 87.1) | 94.8                         |
|                                 | Urban       | 60.8 (59.4 to 62.1)                    | 67.7 (65.5 to 69.8) | 73.8 (71.1 to 76.5)                     | 83.7 (79.4 to 87.2) | 95.8                         |
| Composite Treatment (mega)      | Rural       | 53.6 (45.7 to 61.4)                    | 46.6 (35.6 to 57.9) | 42.4 (27.9 to 58.7)                     | 32.7 (11.1 to 64.7) | 0.1                          |
|                                 | Urban       | 58.1 (50.8 to 65.1)                    | 53.9 (44.8 to 62.7) | 47.9 (33.0 to 63.4)                     | 37.6 (13.7 to 69.0) | 0.4                          |
| Composite Coverage (mega)       | Rural       | 57.6 (49.6 to 65.2)                    | 58.9 (47.4 to 69.5) | 62.0 (45.8 to 76.1)                     | 66.8 (33.7 to 88.8) | 16.3                         |
|                                 | Urban       | 59.8 (52.5 to 66.7)                    | 62.6 (53.5 to 70.9) | 64.7 (49.7 to 77.7)                     | 69.1 (37.3 to 89.6) | 18.9                         |
| Composite Prevention (a.mean)   | Rural       | 60.5 (59.5 to 61.5)                    | 66.8 (64.7 to 68.9) | 73.1 (70.1 to 75.8)                     | 82.8 (78.1 to 86.6) | 88.9                         |
|                                 | Urban       | 60.2 (58.8 to 61.6)                    | 67.1 (64.9 to 69.2) | 72.9 (70.0 to 75.6)                     | 82.7 (78.0 to 86.4) | 88.1                         |
| Composite Treatment (a.mean)    | Rural       | 52.3 (44.4 to 60.1)                    | 46.6 (35.6 to 57.9) | 43.4 (28.7 to 60.2)                     | 35.5 (12.7 to 68.3) | 0.3                          |
|                                 | Urban       | 57.0 (49.7 to 64.0)                    | 53.9 (44.8 to 62.7) | 49.1 (34.4 to 64.4)                     | 40.8 (15.8 to 72.9) | 0.7                          |
| Composite Coverage (a.mean)     | Rural       | 57.0 (49.0 to 64.6)                    | 57.5 (46.1 to 68.2) | 60.6 (44.1 to 75.3)                     | 64.8 (32.1 to 87.7) | 13.7                         |
|                                 | Urban       | 58.7 (51.3 to 65.6)                    | 61.7 (52.6 to 70.1) | 63.2 (47.9 to 76.5)                     | 67.0 (35.3 to 88.8) | 16.8                         |
| Composite Prevention (geo.mean) | Rural       | 51.3 (50.3 to 52.3)                    | 64.6 (62.4 to 66.7) | 75.0 (72.3 to 77.5)                     | 89.5 (86.4 to 91.9) | 100.0                        |
|                                 | Urban       | 54.1 (52.7 to 55.5)                    | 65.7 (63.5 to 67.9) | 76.8 (74.3 to 79.2)                     | 90.4 (87.6 to 92.6) | 100.0                        |
| Composite Treatment (geo.mean)  | Rural       | 43.7 (36.1 to 51.7)                    | 38.4 (28.1 to 49.8) | 35.9 (22.7 to 51.9)                     | 29.3 (9.6 to 61.8)  | 0.1                          |
|                                 | Urban       | 53.1 (45.8 to 60.2)                    | 50.4 (41.4 to 59.4) | 46.0 (31.6 to 61.7)                     | 38.4 (14.5 to 70.7) | 0.4                          |
| Composite Coverage (geo.mean)   | Rural       | 48.3 (40.5 to 56.3)                    | 52.1 (40.8 to 63.1) | 57.5 (41.9 to 72.6)                     | 66.6 (35.0 to 88.8) | 16.5                         |
|                                 | Urban       | 53.6 (46.3 to 60.8)                    | 59.1 (50.0 to 67.7) | 63.3 (47.8 to 76.8)                     | 71.7 (40.5 to 91.0) | 25.9                         |

Note: meta=Meta-analysis random effects; a.mean=Arithmetic Means; geo.mean=Geometric Means



**Table S20: Sensitivity analysis of composite methods in observed, predicted coverage and probability of reaching targets by regional levels, 2010–2030**

| Indicators                      | Regional Levels                 | Estimated coverage in percent (95% CI) |                     | Predicted coverage in percent (95% CrI) |                     | Probability reach target (%) |
|---------------------------------|---------------------------------|----------------------------------------|---------------------|-----------------------------------------|---------------------|------------------------------|
|                                 |                                 | Year 2010                              | Year 2015           | Year 2020                               | Year 2030           |                              |
| Composite Prevention (mega)     | Northern Midlands and Mountains | 70.4 (68.9 to 71.8)                    | 67.9 (65.1 to 70.6) | 65.7 (59.7 to 71.4)                     | 60.9 (47.7 to 72.8) | 0.0                          |
|                                 | Red River Delta                 | 62.2 (59.7 to 64.7)                    | 64.9 (60.1 to 69.4) | 70.2 (61.2 to 76.7)                     | 77.0 (59.4 to 87.2) | 32.2                         |
|                                 | North Central and Central Coast | 57.3 (55.7 to 58.9)                    | 70.6 (65.6 to 75.2) | 79.0 (72.5 to 85.2)                     | 91.3 (83.8 to 96.1) | 99.6                         |
|                                 | Central Highlands               | 63.2 (61.0 to 65.5)                    | 68.4 (60.1 to 75.7) | 72.7 (62.1 to 81.8)                     | 80.6 (60.8 to 92.2) | 53.1                         |
|                                 | Southeast                       | 58.7 (56.3 to 61.0)                    | 66.4 (63.4 to 69.3) | 73.9 (68.4 to 78.5)                     | 84.9 (76.3 to 90.7) | 88.4                         |
| Composite Treatment (mega)      | Mekong River Delta              | 56.2 (53.7 to 58.6)                    | 69.6 (66.3 to 72.7) | 73.7 (64.1 to 81.9)                     | 83.2 (62.7 to 93.5) | 68.5                         |
|                                 | Northern Midlands and Mountains | 48.2 (35.7 to 61.0)                    | 55.6 (44.1 to 66.5) | 49.0 (32.8 to 72.5)                     | 43.2 (14.4 to 88.4) | 6.4                          |
|                                 | Red River Delta                 | 57.8 (43.3 to 71.0)                    | 45.0 (37.3 to 53.0) | 38.0 (23.3 to 51.9)                     | 22.4 (5.4 to 52.4)  | 0.0                          |
|                                 | North Central and Central Coast | 54.0 (41.8 to 65.7)                    | 55.1 (46.4 to 63.5) | 49.1 (34.4 to 68.3)                     | 42.5 (15.1 to 81.7) | 3.4                          |
|                                 | Central Highlands               | 52.6 (37.3 to 67.5)                    | 57.1 (43.3 to 70.0) | 48.5 (30.7 to 73.4)                     | 40.9 (12.1 to 88.3) | 6.9                          |
| Composite Coverage (mega)       | Southeast                       | 56.9 (44.8 to 68.2)                    | 47.1 (34.1 to 60.5) | 41.4 (22.4 to 61.2)                     | 28.1 (5.2 to 68.9)  | 0.6                          |
|                                 | Mekong River Delta              | 66.7 (54.4 to 77.1)                    | 45.2 (39.6 to 51.0) | 43.3 (28.0 to 62.9)                     | 31.3 (9.2 to 72.2)  | 1.2                          |
|                                 | Northern Midlands and Mountains | 60.7 (47.6 to 72.4)                    | 62.5 (51.0 to 72.8) | 64.1 (55.6 to 72.6)                     | 69.0 (50.0 to 83.8) | 8.3                          |
|                                 | Red River Delta                 | 60.0 (45.5 to 73.0)                    | 57.8 (52.7 to 62.8) | 62.7 (54.9 to 69.9)                     | 67.5 (49.1 to 82.1) | 5.4                          |
|                                 | North Central and Central Coast | 55.6 (43.3 to 67.2)                    | 65.1 (59.7 to 70.1) | 64.7 (56.9 to 72.4)                     | 69.5 (51.1 to 83.8) | 8.6                          |
| Composite Prevention (a.mean)   | Central Highlands               | 57.9 (42.2 to 72.1)                    | 65.5 (56.3 to 73.6) | 64.5 (56.1 to 72.7)                     | 69.3 (50.6 to 83.8) | 8.2                          |
|                                 | Southeast                       | 58.5 (46.3 to 69.6)                    | 58.8 (45.2 to 71.2) | 63.6 (54.9 to 71.8)                     | 68.3 (49.2 to 83.3) | 7.5                          |
|                                 | Mekong River Delta              | 60.3 (48.0 to 71.5)                    | 60.5 (56.8 to 64.0) | 63.8 (56.1 to 71.5)                     | 68.7 (50.4 to 83.3) | 7.4                          |
|                                 | Northern Midlands and Mountains | 68.1 (66.7 to 69.6)                    | 67.3 (64.4 to 70.0) | 66.8 (60.9 to 72.4)                     | 65.8 (52.9 to 76.8) | 0.5                          |
|                                 | Red River Delta                 | 61.8 (59.3 to 64.2)                    | 64.4 (59.6 to 69.0) | 69.9 (61.1 to 76.2)                     | 76.9 (59.6 to 86.7) | 30.1                         |
| Composite Treatment (a.mean)    | North Central and Central Coast | 57.9 (56.3 to 59.4)                    | 70.1 (65.0 to 74.7) | 77.2 (70.8 to 83.9)                     | 89.2 (80.8 to 95.2) | 98.1                         |
|                                 | Central Highlands               | 63.1 (60.8 to 65.3)                    | 67.7 (59.3 to 75.0) | 71.5 (61.7 to 80.9)                     | 79.0 (59.8 to 91.5) | 43.6                         |
|                                 | Southeast                       | 58.0 (55.6 to 60.3)                    | 65.9 (62.9 to 68.8) | 73.6 (68.4 to 78.2)                     | 84.8 (76.5 to 90.6) | 88.9                         |
|                                 | Mekong River Delta              | 56.6 (54.2 to 59.0)                    | 68.6 (65.2 to 71.7) | 72.8 (64.7 to 80.1)                     | 82.3 (66.2 to 91.9) | 66.4                         |
|                                 | Northern Midlands and Mountains | 46.4 (34.0 to 59.3)                    | 55.6 (44.1 to 66.5) | 50.2 (32.1 to 74.1)                     | 47.2 (14.6 to 90.4) | 10.4                         |
| Composite Coverage (a.mean)     | Red River Delta                 | 57.8 (43.3 to 71.0)                    | 44.4 (36.7 to 52.3) | 36.5 (22.1 to 51.2)                     | 21.0 (4.6 to 51.6)  | 0.1                          |
|                                 | North Central and Central Coast | 50.8 (38.8 to 62.7)                    | 53.5 (44.9 to 62.0) | 48.6 (33.4 to 68.1)                     | 43.1 (15.3 to 83.0) | 4.0                          |
|                                 | Central Highlands               | 50.0 (34.8 to 65.2)                    | 55.1 (41.3 to 68.1) | 47.8 (28.9 to 73.7)                     | 41.7 (10.4 to 89.0) | 7.2                          |
|                                 | Southeast                       | 56.9 (44.8 to 68.2)                    | 45.1 (32.3 to 58.6) | 38.8 (20.7 to 60.1)                     | 24.6 (4.3 to 67.3)  | 0.4                          |
|                                 | Mekong River Delta              | 66.7 (54.4 to 77.1)                    | 43.5 (38.0 to 49.3) | 42.2 (25.6 to 61.8)                     | 30.4 (7.6 to 70.6)  | 1.1                          |
| Composite Prevention (geo.mean) | Northern Midlands and Mountains | 58.9 (45.9 to 70.8)                    | 62.5 (51.0 to 72.8) | 60.2 (51.8 to 69.2)                     | 61.8 (41.7 to 79.3) | 2.0                          |
|                                 | Red River Delta                 | 60.0 (45.5 to 73.0)                    | 55.9 (50.8 to 60.9) | 58.9 (50.7 to 66.2)                     | 60.4 (41.3 to 77.5) | 1.1                          |
|                                 | North Central and Central Coast | 55.6 (43.3 to 67.2)                    | 62.9 (57.4 to 68.0) | 60.7 (52.7 to 68.7)                     | 62.3 (42.6 to 79.3) | 2.1                          |
|                                 | Central Highlands               | 57.9 (42.2 to 72.1)                    | 61.9 (52.7 to 70.4) | 60.2 (51.8 to 68.6)                     | 61.9 (41.8 to 78.9) | 1.9                          |
|                                 | Southeast                       | 56.9 (44.8 to 68.2)                    | 56.9 (43.3 to 69.5) | 59.5 (50.6 to 68.3)                     | 61.2 (40.9 to 78.6) | 1.8                          |
| Composite Treatment (geo.mean)  | Mekong River Delta              | 60.3 (48.0 to 71.5)                    | 57.8 (54.1 to 61.4) | 59.9 (51.8 to 67.8)                     | 61.4 (41.6 to 78.4) | 1.7                          |
|                                 | Northern Midlands and Mountains | 60.3 (58.7 to 61.8)                    | 66.0 (63.2 to 68.8) | 71.2 (65.9 to 76.1)                     | 80.1 (70.9 to 87.1) | 51.0                         |
|                                 | Red River Delta                 | 56.7 (54.2 to 59.2)                    | 62.7 (57.8 to 67.3) | 71.0 (62.2 to 77.2)                     | 82.2 (67.0 to 90.2) | 63.2                         |
|                                 | North Central and Central Coast | 46.3 (44.7 to 47.9)                    | 68.0 (62.9 to 72.7) | 81.8 (76.4 to 87.5)                     | 95.9 (92.2 to 98.3) | 100.0                        |
|                                 | Central Highlands               | 43.9 (41.6 to 46.3)                    | 65.4 (57.0 to 73.0) | 81.6 (72.5 to 88.2)                     | 96.1 (89.6 to 98.6) | 100.0                        |
| Composite Coverage (geo.mean)   | Southeast                       | 51.3 (48.9 to 53.7)                    | 63.9 (60.9 to 66.8) | 75.6 (70.6 to 79.8)                     | 90.0 (84.0 to 93.9) | 99.9                         |
|                                 | Mekong River Delta              | 45.9 (43.5 to 48.3)                    | 65.3 (61.9 to 68.6) | 77.1 (68.3 to 84.4)                     | 91.6 (78.8 to 97.2) | 96.9                         |
|                                 | Northern Midlands and Mountains | 33.9 (22.9 to 47.0)                    | 52.8 (41.4 to 63.9) | 62.2 (37.7 to 83.5)                     | 80.7 (30.4 to 98.3) | 51.5                         |
|                                 | Red River Delta                 | 48.9 (35.0 to 63.0)                    | 37.7 (30.4 to 45.7) | 29.2 (15.3 to 47.1)                     | 15.2 (2.4 to 52.4)  | 0.1                          |
|                                 | North Central and Central Coast | 42.9 (31.4 to 55.1)                    | 49.6 (41.1 to 58.2) | 52.6 (34.2 to 72.2)                     | 60.9 (21.2 to 91.8) | 17.5                         |
| Composite Treatment (geo.mean)  | Central Highlands               | 39.5 (25.6 to 55.3)                    | 49.0 (35.6 to 62.5) | 51.3 (25.9 to 78.0)                     | 59.0 (10.8 to 95.9) | 23.5                         |
|                                 | Southeast                       | 52.3 (40.4 to 64.0)                    | 39.2 (27.0 to 52.9) | 29.9 (12.7 to 54.4)                     | 15.2 (1.6 to 63.9)  | 0.4                          |

| Indicators                    | Regional Levels                 | Estimated coverage in percent (95% CI) |                     | Predicted coverage in percent (95% CrI) |                     | Probability reach target (%) |
|-------------------------------|---------------------------------|----------------------------------------|---------------------|-----------------------------------------|---------------------|------------------------------|
|                               |                                 | Year 2010                              | Year 2015           | Year 2020                               | Year 2030           |                              |
| Composite Coverage (geo.mean) | Mekong River Delta              | 63.5 (51.1 to 74.3)                    | 32.3 (27.2 to 37.9) | 38.1 (15.7 to 69.1)                     | 30.0 (2.9 to 88.6)  | 5.2                          |
|                               | Northern Midlands and Mountains | 46.4 (34.0 to 59.3)                    | 59.7 (48.2 to 70.3) | 64.1 (47.2 to 81.2)                     | 77.2 (42.9 to 95.7) | 42.3                         |
|                               | Red River Delta                 | 53.3 (39.1 to 67.1)                    | 50.7 (45.6 to 55.8) | 54.0 (40.5 to 64.9)                     | 58.8 (27.2 to 81.0) | 3.4                          |
|                               | North Central and Central Coast | 44.4 (32.8 to 56.7)                    | 59.4 (53.9 to 64.6) | 66.7 (54.4 to 78.4)                     | 80.9 (55.6 to 94.7) | 53.4                         |
|                               | Central Highlands               | 42.1 (27.9 to 57.8)                    | 57.5 (48.3 to 66.2) | 63.0 (48.1 to 78.8)                     | 75.7 (43.9 to 95.1) | 38.2                         |
|                               | Southeast                       | 52.3 (40.4 to 64.0)                    | 51.0 (37.7 to 64.1) | 56.5 (34.4 to 74.1)                     | 63.5 (20.2 to 90.2) | 14.2                         |
|                               | Mekong River Delta              | 52.4 (40.3 to 64.2)                    | 48.4 (44.7 to 52.1) | 59.0 (43.3 to 74.1)                     | 68.4 (34.5 to 90.6) | 17.6                         |

Note: meta=Meta-analysis random effects; a.mean=Arithmetic Means; geo.mean=Geometric Means

**Table S21: Sensitivity analysis of composite methods in observed, predicted coverage and probability of reaching targets by wealth quintiles, 2010–2030**

| Indicators                      | Wealth Quintiles | Estimated coverage in percent (95% CI) |                     | Predicted coverage in percent (95% CrI) |                     | Probability reach target (%) |
|---------------------------------|------------------|----------------------------------------|---------------------|-----------------------------------------|---------------------|------------------------------|
|                                 |                  | Year 2010                              | Year 2015           | Year 2020                               | Year 2030           |                              |
| Composite Prevention (mega)     | Poorest          | 58.2 (56.4 to 60.1)                    | 64.0 (60.6 to 67.4) | 71.2 (67.9 to 74.3)                     | 81.6 (76.6 to 85.7) | 74.4                         |
|                                 | Poorer           | 60.2 (58.5 to 61.9)                    | 66.0 (63.0 to 69.1) | 72.8 (69.7 to 75.8)                     | 82.8 (78.0 to 86.7) | 88.3                         |
|                                 | Middle           | 59.8 (58.2 to 61.5)                    | 66.4 (62.6 to 70.3) | 72.7 (69.4 to 75.8)                     | 82.6 (77.8 to 86.7) | 86.7                         |
|                                 | Richer           | 61.8 (59.8 to 63.8)                    | 70.1 (66.8 to 73.5) | 74.6 (71.5 to 77.5)                     | 84.0 (79.5 to 87.8) | 96.0                         |
|                                 | Richest          | 63.4 (60.2 to 66.7)                    | 70.8 (67.6 to 74.0) | 76.0 (72.9 to 78.8)                     | 85.0 (80.8 to 88.4) | 98.9                         |
| Composite Treatment (mega)      | Poorest          | 53.3 (41.5 to 65.2)                    | 48.4 (30.8 to 66.0) | 43.1 (27.3 to 60.5)                     | 33.3 (11.8 to 65.5) | 0.1                          |
|                                 | Poorer           | 58.0 (47.3 to 68.8)                    | 50.0 (34.5 to 65.5) | 46.8 (31.1 to 63.4)                     | 36.8 (13.7 to 68.2) | 0.2                          |
|                                 | Middle           | 54.6 (43.5 to 65.8)                    | 54.8 (37.3 to 72.4) | 45.8 (29.5 to 63.1)                     | 35.8 (12.9 to 67.9) | 0.2                          |
|                                 | Richer           | 57.5 (45.8 to 69.3)                    | 60.0 (43.8 to 76.2) | 49.9 (33.4 to 66.5)                     | 39.6 (15.2 to 71.0) | 0.4                          |
|                                 | Richest          | 61.0 (54.0 to 68.0)                    | 51.0 (37.3 to 64.7) | 50.1 (34.1 to 66.1)                     | 39.9 (15.1 to 71.4) | 0.4                          |
| Composite Coverage (mega)       | Poorest          | 56.4 (44.8 to 68.0)                    | 58.1 (40.7 to 75.4) | 60.5 (43.3 to 75.7)                     | 64.5 (33.0 to 87.4) | 12.1                         |
|                                 | Poorer           | 59.3 (48.6 to 70.0)                    | 60.0 (44.8 to 75.2) | 62.9 (46.3 to 77.2)                     | 66.8 (35.5 to 88.4) | 15.1                         |
|                                 | Middle           | 57.9 (47.0 to 68.8)                    | 61.3 (44.1 to 78.4) | 62.4 (45.2 to 77.2)                     | 66.3 (34.4 to 88.4) | 14.6                         |
|                                 | Richer           | 60.1 (48.6 to 71.6)                    | 65.7 (50.0 to 81.4) | 65.3 (48.6 to 79.2)                     | 69.0 (37.8 to 89.5) | 19.1                         |
|                                 | Richest          | 62.3 (57.3 to 67.3)                    | 62.7 (49.5 to 76.0) | 66.1 (50.0 to 79.5)                     | 69.8 (37.8 to 90.0) | 21.2                         |
| Composite Prevention (a.mean)   | Poorest          | 58.9 (57.1 to 60.8)                    | 63.4 (59.9 to 66.8) | 70.7 (67.4 to 73.8)                     | 80.5 (75.2 to 84.8) | 57.2                         |
|                                 | Poorer           | 60.3 (58.6 to 61.9)                    | 65.4 (62.3 to 68.4) | 71.9 (68.8 to 74.9)                     | 81.4 (76.4 to 85.6) | 71.8                         |
|                                 | Middle           | 59.7 (58.1 to 61.3)                    | 65.9 (62.1 to 69.8) | 71.7 (68.3 to 74.8)                     | 81.2 (76.0 to 85.5) | 68.4                         |
|                                 | Richer           | 61.3 (59.3 to 63.3)                    | 69.7 (66.3 to 73.1) | 73.4 (70.2 to 76.4)                     | 82.5 (77.6 to 86.5) | 85.1                         |
|                                 | Richest          | 62.7 (59.5 to 66.0)                    | 70.3 (67.0 to 73.5) | 74.8 (71.6 to 77.7)                     | 83.5 (79.0 to 87.2) | 93.9                         |
| Composite Treatment (a.mean)    | Poorest          | 51.4 (39.6 to 63.2)                    | 45.2 (27.6 to 62.7) | 41.3 (25.8 to 58.6)                     | 32.1 (11.2 to 64.0) | 0.1                          |
|                                 | Poorer           | 56.2 (45.4 to 67.0)                    | 47.5 (32.0 to 63.0) | 45.2 (29.6 to 61.8)                     | 35.7 (13.1 to 67.2) | 0.2                          |
|                                 | Middle           | 53.3 (42.1 to 64.5)                    | 54.8 (37.3 to 72.4) | 45.3 (29.2 to 62.6)                     | 35.8 (12.8 to 68.0) | 0.2                          |
|                                 | Richer           | 56.3 (44.5 to 68.1)                    | 60.0 (43.8 to 76.2) | 49.4 (32.9 to 66.0)                     | 39.7 (15.1 to 70.9) | 0.4                          |
|                                 | Richest          | 60.6 (53.6 to 67.6)                    | 51.0 (37.3 to 64.7) | 50.2 (34.1 to 66.2)                     | 40.4 (15.2 to 71.8) | 0.4                          |
| Composite Coverage (a.mean)     | Poorest          | 55.5 (43.9 to 67.2)                    | 54.8 (37.3 to 72.4) | 58.6 (41.3 to 74.1)                     | 62.1 (30.8 to 86.2) | 9.4                          |
|                                 | Poorer           | 58.6 (47.9 to 69.2)                    | 57.5 (42.2 to 72.8) | 61.4 (44.9 to 75.9)                     | 64.9 (33.6 to 87.3) | 12.2                         |
|                                 | Middle           | 57.1 (46.2 to 67.9)                    | 61.3 (44.1 to 78.4) | 61.5 (44.4 to 76.4)                     | 65.0 (33.3 to 87.6) | 12.9                         |
|                                 | Richer           | 59.0 (47.5 to 70.6)                    | 65.7 (50.0 to 81.4) | 64.4 (47.6 to 78.4)                     | 67.8 (36.4 to 88.8) | 16.9                         |
|                                 | Richest          | 61.8 (56.8 to 66.8)                    | 62.7 (49.5 to 76.0) | 65.2 (49.1 to 78.8)                     | 68.6 (36.6 to 89.5) | 19.0                         |
| Composite Prevention (geo.mean) | Poorest          | 44.9 (42.7 to 47.1)                    | 57.7 (54.1 to 61.2) | 70.1 (66.8 to 73.2)                     | 87.1 (83.4 to 90.1) | 100.0                        |
|                                 | Poorer           | 49.0 (47.1 to 50.9)                    | 62.8 (59.7 to 65.9) | 73.6 (70.5 to 76.4)                     | 88.9 (85.7 to 91.5) | 100.0                        |
|                                 | Middle           | 51.5 (49.7 to 53.2)                    | 64.2 (60.3 to 68.1) | 75.3 (72.3 to 78.2)                     | 89.8 (86.7 to 92.3) | 100.0                        |
|                                 | Richer           | 55.6 (53.5 to 57.7)                    | 68.9 (65.4 to 72.3) | 78.4 (75.7 to 81.0)                     | 91.3 (88.6 to 93.4) | 100.0                        |
|                                 | Richest          | 59.7 (56.4 to 63.0)                    | 69.6 (66.3 to 72.9) | 80.4 (77.8 to 82.8)                     | 92.2 (89.8 to 94.1) | 100.0                        |
| Composite Treatment (geo.mean)  | Poorest          | 44.2 (32.4 to 56.1)                    | 35.5 (18.6 to 52.3) | 34.4 (20.4 to 51.6)                     | 26.9 (8.9 to 58.2)  | 0.0                          |
|                                 | Poorer           | 49.8 (38.9 to 60.7)                    | 42.5 (27.2 to 57.8) | 40.0 (25.4 to 56.8)                     | 31.9 (11.3 to 63.3) | 0.1                          |
|                                 | Middle           | 47.2 (36.1 to 58.4)                    | 48.4 (30.8 to 66.0) | 40.1 (25.0 to 57.2)                     | 31.9 (11.1 to 63.7) | 0.1                          |
|                                 | Richer           | 49.8 (37.9 to 61.6)                    | 54.3 (37.8 to 70.8) | 43.9 (28.4 to 60.8)                     | 35.5 (13.1 to 66.8) | 0.2                          |
|                                 | Richest          | 55.0 (48.0 to 62.1)                    | 47.1 (33.4 to 60.8) | 45.7 (30.2 to 61.9)                     | 37.1 (13.6 to 68.7) | 0.2                          |
| Composite Coverage (geo.mean)   | Poorest          | 44.5 (32.8 to 56.2)                    | 48.4 (30.8 to 66.0) | 53.6 (36.7 to 69.9)                     | 62.6 (31.5 to 86.3) | 9.6                          |
|                                 | Poorer           | 49.3 (38.4 to 60.1)                    | 52.5 (37.0 to 68.0) | 58.1 (41.6 to 73.1)                     | 66.8 (35.9 to 88.1) | 14.6                         |
|                                 | Middle           | 49.7 (38.7 to 60.7)                    | 58.1 (40.7 to 75.4) | 60.0 (42.9 to 75.1)                     | 68.5 (37.1 to 89.1) | 18.0                         |
|                                 | Richer           | 53.0 (41.2 to 64.7)                    | 62.9 (46.8 to 78.9) | 63.8 (47.1 to 77.9)                     | 71.9 (41.3 to 90.5) | 25.0                         |
|                                 | Richest          | 57.7 (52.6 to 62.7)                    | 58.8 (45.3 to 72.3) | 66.2 (50.3 to 79.3)                     | 74.0 (43.2 to 91.5) | 30.8                         |

Note: meta=Meta-analysis random effects; a.mean=Arithmetic Means; geo.mean=Geometric Means

**Table S22: Sensitivity analysis of composite methods in observed, predicted coverage and probability of reaching targets by educational levels, 2010–2030**

| Indicators                      | Education Levels      | Estimated coverage in percent (95% CI) |                     | Predicted coverage in percent (95% CrI) |                     | Probability reach target (%) |
|---------------------------------|-----------------------|----------------------------------------|---------------------|-----------------------------------------|---------------------|------------------------------|
|                                 |                       | Year 2010                              | Year 2015           | Year 2020                               | Year 2030           |                              |
| Composite Prevention (mega)     | Lower than primary    | 59.5 (57.8 to 61.2)                    | 63.7 (59.9 to 67.2) | 71.9 (68.7 to 74.9)                     | 82.0 (77.2 to 86.1) | 80.6                         |
|                                 | Primary school        | 61.1 (58.8 to 63.4)                    | 68.8 (65.0 to 72.3) | 73.9 (70.7 to 76.7)                     | 83.4 (78.8 to 87.1) | 92.9                         |
|                                 | Secondary school      | 59.4 (57.9 to 61.0)                    | 65.1 (61.7 to 68.3) | 72.1 (68.9 to 75.1)                     | 82.1 (77.3 to 86.1) | 81.7                         |
|                                 | Highschool            | 61.2 (59.6 to 62.7)                    | 68.7 (65.8 to 71.5) | 73.8 (70.8 to 76.6)                     | 83.4 (78.9 to 87.1) | 93.1                         |
|                                 | University and higher | 62.6 (60.2 to 64.9)                    | 70.8 (67.2 to 74.2) | 75.2 (72.2 to 78.1)                     | 84.4 (80.1 to 87.9) | 97.7                         |
| Composite Treatment (mega)      | Lower than primary    | 61.9 (51.2 to 71.6)                    | 50.0 (35.8 to 64.2) | 52.7 (36.3 to 69.3)                     | 46.7 (18.5 to 77.6) | 1.8                          |
|                                 | Primary school        | 51.3 (36.2 to 66.1)                    | 50.0 (34.5 to 65.5) | 46.0 (29.5 to 63.4)                     | 39.8 (14.7 to 72.7) | 0.7                          |
|                                 | Secondary school      | 55.1 (43.4 to 66.2)                    | 53.1 (36.4 to 69.1) | 49.5 (32.4 to 67.0)                     | 43.5 (16.4 to 75.8) | 1.1                          |
|                                 | Highschool            | 53.8 (42.9 to 64.3)                    | 54.8 (39.9 to 68.8) | 49.0 (32.7 to 66.3)                     | 43.2 (16.5 to 75.4) | 1.0                          |
|                                 | University and higher | 54.4 (41.6 to 66.6)                    | 55.9 (39.5 to 71.1) | 50.5 (33.3 to 67.9)                     | 44.2 (17.0 to 76.3) | 1.3                          |
| Composite Coverage (mega)       | Lower than primary    | 60.7 (50.0 to 70.5)                    | 59.1 (44.4 to 72.3) | 65.3 (48.3 to 79.0)                     | 70.8 (37.3 to 90.6) | 24.6                         |
|                                 | Primary school        | 56.4 (41.0 to 70.7)                    | 61.1 (44.9 to 75.2) | 63.3 (45.8 to 78.4)                     | 69.0 (35.9 to 89.7) | 20.2                         |
|                                 | Secondary school      | 58.0 (46.2 to 68.9)                    | 59.4 (42.3 to 74.5) | 63.3 (45.8 to 78.5)                     | 69.0 (35.3 to 90.2) | 21.6                         |
|                                 | Highschool            | 57.5 (46.6 to 67.7)                    | 64.3 (49.2 to 77.0) | 64.8 (47.0 to 78.9)                     | 70.4 (36.5 to 90.5) | 23.6                         |
|                                 | University and higher | 59.6 (46.7 to 71.4)                    | 64.7 (47.9 to 78.5) | 66.3 (47.9 to 80.3)                     | 72.0 (37.5 to 90.9) | 25.9                         |
| Composite Prevention (a.mean)   | Lower than primary    | 59.8 (58.1 to 61.5)                    | 63.0 (59.3 to 66.6) | 71.4 (68.2 to 74.5)                     | 81.0 (76.0 to 85.3) | 65.6                         |
|                                 | Primary school        | 60.6 (58.3 to 62.9)                    | 68.1 (64.4 to 71.6) | 72.8 (69.6 to 75.8)                     | 82.0 (77.3 to 86.1) | 80.7                         |
|                                 | Secondary school      | 59.5 (58.0 to 61.1)                    | 64.6 (61.2 to 67.8) | 71.4 (68.3 to 74.4)                     | 81.0 (76.1 to 85.2) | 66.0                         |
|                                 | Highschool            | 61.0 (59.5 to 62.5)                    | 68.1 (65.1 to 70.9) | 73.0 (70.0 to 75.8)                     | 82.2 (77.5 to 86.2) | 82.8                         |
|                                 | University and higher | 61.8 (59.4 to 64.2)                    | 70.3 (66.7 to 73.7) | 74.0 (71.0 to 76.9)                     | 82.9 (78.5 to 86.8) | 90.9                         |
| Composite Treatment (a.mean)    | Lower than primary    | 59.5 (48.8 to 69.4)                    | 50.0 (35.8 to 64.2) | 49.3 (32.9 to 66.2)                     | 41.0 (14.5 to 73.1) | 0.8                          |
|                                 | Primary school        | 51.3 (36.2 to 66.1)                    | 47.2 (32.0 to 63.0) | 43.0 (26.0 to 60.8)                     | 35.3 (11.5 to 68.2) | 0.3                          |
|                                 | Secondary school      | 55.1 (43.4 to 66.2)                    | 50.0 (33.6 to 66.4) | 46.6 (29.2 to 64.0)                     | 38.5 (12.7 to 71.3) | 0.5                          |
|                                 | Highschool            | 52.5 (41.7 to 63.1)                    | 52.4 (37.7 to 66.6) | 45.6 (29.3 to 62.9)                     | 37.8 (12.7 to 70.5) | 0.4                          |
|                                 | University and higher | 54.4 (41.6 to 66.6)                    | 52.9 (36.7 to 68.5) | 47.3 (30.1 to 64.9)                     | 39.3 (13.5 to 71.9) | 0.5                          |
| Composite Coverage (a.mean)     | Lower than primary    | 59.5 (48.8 to 69.4)                    | 56.8 (42.2 to 70.3) | 63.0 (45.4 to 77.7)                     | 67.9 (34.0 to 89.8) | 19.7                         |
|                                 | Primary school        | 56.4 (41.0 to 70.7)                    | 61.1 (44.9 to 75.2) | 62.9 (44.5 to 77.7)                     | 67.7 (34.5 to 89.5) | 19.4                         |
|                                 | Secondary school      | 58.0 (46.2 to 68.9)                    | 59.4 (42.3 to 74.5) | 63.0 (44.6 to 77.8)                     | 67.7 (33.8 to 89.8) | 20.0                         |
|                                 | Highschool            | 57.5 (46.6 to 67.7)                    | 61.9 (46.8 to 75.0) | 63.3 (45.7 to 78.2)                     | 68.2 (34.5 to 89.9) | 20.3                         |
|                                 | University and higher | 57.9 (45.0 to 69.8)                    | 64.7 (47.9 to 78.5) | 64.8 (46.5 to 79.6)                     | 69.6 (35.8 to 90.5) | 22.9                         |
| Composite Prevention (geo.mean) | Lower than primary    | 45.6 (43.9 to 47.4)                    | 58.2 (54.4 to 61.9) | 70.4 (67.0 to 73.3)                     | 87.1 (83.3 to 90.0) | 99.9                         |
|                                 | Primary school        | 54.8 (52.5 to 57.2)                    | 66.7 (62.9 to 70.3) | 77.4 (74.5 to 80.0)                     | 90.6 (87.7 to 92.8) | 100.0                        |
|                                 | Secondary school      | 49.8 (48.2 to 51.4)                    | 62.0 (58.5 to 65.3) | 73.7 (70.6 to 76.4)                     | 88.8 (85.4 to 91.4) | 100.0                        |
|                                 | Highschool            | 52.5 (51.0 to 54.1)                    | 66.4 (63.4 to 69.3) | 76.0 (73.2 to 78.6)                     | 90.0 (87.0 to 92.3) | 100.0                        |
|                                 | University and higher | 58.6 (56.1 to 60.9)                    | 69.7 (66.1 to 73.1) | 79.9 (77.2 to 82.3)                     | 91.9 (89.2 to 93.7) | 100.0                        |
| Composite Treatment (geo.mean)  | Lower than primary    | 56.0 (45.3 to 66.1)                    | 43.2 (29.7 to 57.8) | 47.7 (31.3 to 64.9)                     | 42.8 (16.0 to 75.1) | 1.0                          |
|                                 | Primary school        | 46.2 (31.6 to 61.4)                    | 41.7 (27.1 to 57.8) | 40.3 (25.3 to 58.1)                     | 35.7 (13.0 to 68.8) | 0.3                          |
|                                 | Secondary school      | 46.4 (35.1 to 58.0)                    | 46.9 (30.9 to 63.6) | 42.2 (26.4 to 60.7)                     | 37.2 (13.3 to 71.7) | 0.5                          |
|                                 | Highschool            | 42.5 (32.3 to 53.4)                    | 47.6 (33.4 to 62.3) | 40.3 (25.1 to 57.6)                     | 35.5 (12.2 to 68.6) | 0.3                          |
|                                 | University and higher | 49.1 (36.6 to 61.7)                    | 50.0 (34.1 to 65.9) | 45.6 (29.2 to 63.9)                     | 40.6 (15.0 to 74.0) | 0.8                          |
| Composite Coverage (geo.mean)   | Lower than primary    | 50.0 (39.5 to 60.5)                    | 52.3 (37.9 to 66.2) | 60.5 (43.0 to 75.5)                     | 71.2 (37.9 to 90.6) | 24.7                         |
|                                 | Primary school        | 51.3 (36.2 to 66.1)                    | 55.6 (39.6 to 70.5) | 62.2 (44.9 to 77.4)                     | 72.9 (40.2 to 91.4) | 28.1                         |
|                                 | Secondary school      | 47.8 (36.5 to 59.4)                    | 56.2 (39.3 to 71.8) | 60.4 (42.0 to 75.9)                     | 71.0 (36.9 to 90.8) | 25.2                         |
|                                 | Highschool            | 47.5 (36.9 to 58.3)                    | 57.1 (42.2 to 70.9) | 60.5 (42.6 to 76.1)                     | 71.1 (37.6 to 90.9) | 24.1                         |
|                                 | University and higher | 54.4 (41.6 to 66.6)                    | 58.8 (42.2 to 73.6) | 65.4 (47.7 to 79.9)                     | 75.3 (42.7 to 92.6) | 35.1                         |

Note: meta=Meta-analysis random effects; a.mean=Arithmetic Means; geo.mean=Geometric Means

**Table S23: Inequality analyses of all NCD management indicators for year 2010**

| Indicators                             | Index | Gender inequality                 | Ethnic inequality              | Urban-Rural Inequality         | Regional Inequality         | Wealth inequality              | Educational Inequality       |
|----------------------------------------|-------|-----------------------------------|--------------------------------|--------------------------------|-----------------------------|--------------------------------|------------------------------|
| Non-use of tobacco                     | RII   | 0.234 (0.232 to 0.236)**          | 1.102 (1.092 to 1.113)**       | 1.090 (1.083 to 1.097)**       | 1.130 (1.124 to 1.136)**    | 1.110 (1.081 to 1.140)**       | 1.042 (1.036 to 1.048)**     |
|                                        | SII   | -100.850 (-101.269 to -100.430)** | 7.168 (6.492 to 7.844)**       | 6.441 (5.964 to 6.918)**       | 9.207 (8.790 to 9.624)**    | 7.731 (5.752 to 9.710)**       | 2.976 (2.554 to 3.397)**     |
|                                        | CnI   | -0.167 (-0.168 to -0.167)**       | 0.006 (0.006 to 0.007)**       | 0.010 (0.010 to 0.011)**       | 0.020 (0.019 to 0.021)**    | 0.016 (0.012 to 0.020)**       | 0.006 (0.005 to 0.007)**     |
| Non-harmful use of alcohol             | RII   | 0.395 (0.392 to 0.398)**          | 1.065 (1.055 to 1.075)**       | 1.057 (1.049 to 1.064)**       | 1.080 (1.073 to 1.086)**    | 0.955 (0.927 to 0.983)**       | 0.883 (0.877 to 0.888)**     |
|                                        | SII   | -73.127 (-73.645 to -72.609)**    | 5.076 (4.312 to 5.840)**       | 4.502 (3.936 to 5.067)**       | 6.184 (5.701 to 6.667)**    | -3.794 (-6.183 to -1.405)**    | -9.968 (-10.454 to -9.482)** |
|                                        | CnI   | -0.112 (-0.112 to -0.111)**       | 0.004 (0.004 to 0.005)**       | 0.006 (0.006 to 0.007)**       | 0.012 (0.011 to 0.013)**    | -0.007 (-0.012 to -0.003)**    | -0.018 (-0.019 to -0.017)**  |
| Sufficient physical activity           | RII   | 1.062 (1.054 to 1.071)**          | 0.625 (0.621 to 0.629)**       | 0.620 (0.614 to 0.626)**       | 1.809 (1.797 to 1.821)**    | 0.802 (0.774 to 0.831)**       | 0.895 (0.889 to 0.901)**     |
|                                        | SII   | 4.629 (4.030 to 5.229)**          | -38.817 (-39.384 to -38.249)** | -35.116 (-35.773 to -34.459)** | 46.801 (46.340 to 47.262)** | -17.042 (-19.760 to -14.324)** | -8.838 (-9.371 to -8.305)**  |
|                                        | CnI   | 0.008 (0.007 to 0.009)**          | -0.035 (-0.036 to -0.034)**    | -0.052 (-0.053 to -0.052)**    | 0.102 (0.101 to 0.103)**    | -0.036 (-0.042 to -0.030)**    | -0.020 (-0.021 to -0.019)**  |
| Sufficient use of fruit and vegetables | RII   | 0.848 (0.822 to 0.875)**          | 0.818 (0.786 to 0.851)**       | 2.260 (2.192 to 2.330)**       | 5.124 (4.978 to 5.274)**    | 3.073 (2.690 to 3.512)**       | 4.131 (4.016 to 4.250)**     |
|                                        | SII   | -2.862 (-3.397 to -2.327)**       | -3.628 (-4.369 to -2.887)**    | 14.881 (14.297 to 15.464)**    | 27.949 (27.528 to 28.371)** | 17.508 (15.325 to 19.691)**    | 22.508 (22.055 to 22.961)**  |
|                                        | CnI   | -0.020 (-0.024 to -0.017)**       | -0.014 (-0.017 to -0.012)**    | 0.098 (0.094 to 0.101)**       | 0.253 (0.249 to 0.257)**    | 0.171 (0.151 to 0.191)**       | 0.216 (0.212 to 0.220)**     |
| Non-overweight                         | RII   | 1.016 (1.011 to 1.021)**          | 0.875 (0.870 to 0.879)**       | 0.793 (0.788 to 0.798)**       | 1.192 (1.187 to 1.197)**    | 0.877 (0.859 to 0.896)**       | 0.935 (0.930 to 0.939)**     |
|                                        | SII   | 1.410 (0.966 to 1.853)**          | -12.179 (-12.663 to -11.695)** | -20.245 (-20.753 to -19.737)** | 15.888 (15.516 to 16.261)** | -11.753 (-13.629 to -9.877)**  | -6.119 (-6.512 to -5.726)**  |
|                                        | CnI   | 0.002 (0.001 to 0.003)**          | -0.009 (-0.010 to -0.009)**    | -0.026 (-0.027 to -0.025)**    | 0.031 (0.031 to 0.032)**    | -0.022 (-0.025 to -0.018)**    | -0.012 (-0.013 to -0.012)**  |
| Treatment of diabetes                  | RII   | 0.309 (0.295 to 0.324)**          | 3.776 (3.476 to 4.101)**       | 3.035 (2.899 to 3.178)**       | 3.443 (3.301 to 3.590)**    | 1.273 (1.032 to 1.569)**       | 0.797 (0.765 to 0.831)**     |
|                                        | SII   | -32.291 (-33.576 to -31.006)**    | 29.149 (27.729 to 30.570)**    | 31.804 (30.458 to 33.150)**    | 32.102 (31.039 to 33.165)** | 6.740 (0.988 to 12.491)*       | -5.351 (-6.488 to -4.214)**  |
|                                        | CnI   | -0.145 (-0.151 to -0.140)**       | 0.079 (0.074 to 0.083)**       | 0.136 (0.131 to 0.142)**       | 0.195 (0.189 to 0.201)**    | 0.038 (0.005 to 0.071)*        | -0.034 (-0.040 to -0.027)**  |
| Treatment of hypertension              | RII   | 0.659 (0.600 to 0.724)**          | 4.739 (3.697 to 6.073)**       | 1.941 (1.767 to 2.133)**       | 2.645 (2.449 to 2.857)**    | 1.790 (1.218 to 2.630)**       | 0.853 (0.788 to 0.923)**     |
|                                        | SII   | -21.658 (-26.397 to -16.919)**    | 60.831 (54.046 to 67.616)**    | 34.370 (29.717 to 39.024)**    | 52.312 (48.513 to 56.111)** | 30.678 (10.816 to 50.540)**    | -7.679 (-11.867 to -3.490)** |
|                                        | CnI   | -0.050 (-0.061 to -0.039)**       | 0.055 (0.048 to 0.062)**       | 0.080 (0.070 to 0.091)**       | 0.160 (0.148 to 0.172)**    | 0.091 (0.031 to 0.150)**       | -0.023 (-0.035 to -0.010)**  |

Note: \*\*\*, \*\*, \* Statistically significant results with P<0.001, P<0.01, and P<0.05, respectively; RII=Relative Index of Inequality; SII=Slope Index of Inequality; CnI=Concentrate Index of Inequality; CI=Confidence Interval;

**Table S24: Wealth inequality in NCD management for all survey years stratifying by genders**

| Indicators                             | Year | Wealth inequality among Women |                             |                          | Wealth inequality among Men |                             |                          |
|----------------------------------------|------|-------------------------------|-----------------------------|--------------------------|-----------------------------|-----------------------------|--------------------------|
|                                        |      | RII_Women                     | SII_Women                   | CnI_Women                | RII_Men                     | SII_Men                     | CnI_Men                  |
| Non-use of tobacco                     | 2010 | 1.05 (1.04 to 1.05)**         | 4.41 (3.62 to 5.20)**       | 0.01 (0.01 to 0.01)**    | 1.41 (1.31 to 1.52)**       | 15.79 (12.37 to 19.21)**    | 0.05 (0.04 to 0.07)**    |
|                                        | 2015 | 1.03 (1.02 to 1.04)**         | 2.56 (1.56 to 3.56)**       | 0.01 (0.00 to 0.01)**    | 1.74 (1.56 to 1.93)**       | 28.90 (23.54 to 34.26)**    | 0.09 (0.07 to 0.11)**    |
| Non-harmful use of alcohol             | 2010 | 0.99 (0.98 to 1.00)           | -0.60 (-1.63 to 0.43)       | -0.00 (-0.00 to 0.00)    | 0.93 (0.87 to 1.00)         | -4.21 (-8.61 to 0.19)       | -0.01 (-0.02 to 0.00)    |
|                                        | 2015 | 1.00 (0.98 to 1.02)           | -0.39 (-2.45 to 1.67)       | -0.00 (-0.00 to 0.00)    | 1.21 (1.03 to 1.42)*        | 10.08 (1.64 to 18.51)*      | 0.03 (0.00 to 0.06)*     |
| Sufficient physical activity           | 2010 | 0.78 (0.74 to 0.82)**         | -19.10 (-22.73 to -15.48)** | -0.04 (-0.05 to -0.03)** | 0.83 (0.79 to 0.87)**       | -14.89 (-18.76 to -11.01)** | -0.03 (-0.04 to -0.02)** |
|                                        | 2015 | 0.74 (0.67 to 0.82)**         | -19.81 (-26.88 to -12.74)** | -0.05 (-0.06 to -0.03)** | 0.77 (0.71 to 0.85)**       | -20.04 (-26.97 to -13.11)** | -0.04 (-0.06 to -0.03)** |
| Sufficient use of fruit and vegetables | 2010 | 3.14 (2.63 to 3.75)**         | 18.15 (15.13 to 21.18)**    | 0.17 (0.15 to 0.20)**    | 3.02 (2.47 to 3.68)**       | 16.87 (13.74 to 20.01)**    | 0.17 (0.14 to 0.20)**    |
|                                        | 2015 | 2.99 (2.55 to 3.51)**         | 53.77 (46.78 to 60.76)**    | 0.18 (0.15 to 0.20)**    | 2.31 (1.85 to 2.89)**       | 31.36 (23.40 to 39.32)**    | 0.13 (0.10 to 0.17)**    |
| Non-overweight                         | 2010 | 0.91 (0.88 to 0.94)**         | -8.27 (-10.95 to -5.59)**   | -0.01 (-0.02 to -0.01)** | 0.84 (0.82 to 0.87)**       | -15.45 (-18.02 to -12.88)** | -0.03 (-0.03 to -0.03)** |
|                                        | 2015 | 0.90 (0.83 to 0.97)*          | -8.55 (-15.10 to -2.00)*    | -0.02 (-0.03 to -0.00)*  | 0.80 (0.74 to 0.87)**       | -19.16 (-25.97 to -12.35)** | -0.04 (-0.05 to -0.02)** |
| Treatment of diabetes                  | 2010 | 1.27 (0.98 to 1.63)           | 8.96 (-0.26 to 18.18)       | 0.04 (-0.00 to 0.08)     | 1.49 (1.05 to 2.13)*        | 7.99 (0.86 to 15.13)*       | 0.06 (0.01 to 0.12)*     |
|                                        | 2015 | 1.28 (0.82 to 1.98)           | 8.25 (-7.33 to 23.83)       | 0.04 (-0.03 to 0.11)     | 3.17 (1.86 to 5.41)**       | 31.55 (18.11 to 44.99)**    | 0.19 (0.10 to 0.27)**    |
| Treatment of hypertension              | 2010 | 1.49 (0.96 to 2.32)           | 24.29 (-1.18 to 49.75)      | 0.07 (-0.00 to 0.14)     | 3.06 (1.55 to 6.03)**       | 48.11 (18.55 to 77.66)**    | 0.16 (0.06 to 0.27)**    |
|                                        | 2015 | 1.11 (0.50 to 2.45)           | 4.67 (-29.69 to 39.03)      | 0.02 (-0.11 to 0.14)     | 3.01 (1.04 to 8.74)*        | 53.08 (22.63 to 83.53)**    | 0.20 (0.04 to 0.36)*     |
| Treatment of high cholesterol          | 2015 | 2.80 (1.28 to 6.11)*          | 22.15 (4.61 to 39.70)*      | 0.16 (0.04 to 0.28)*     | 4.65 (1.63 to 13.28)**      | 39.79 (16.21 to 63.38)**    | 0.23 (0.08 to 0.38)**    |

Note: \*\*\*, \*\*, \* Statistically significant results with P<0.001, P<0.01, and P<0.05, respectively; RII=Relative Index of Inequality; SII=Slope Index of Inequality; CnI=Concentrate Index of Inequality; CI=Confidence Interval;

**Table S25: Wealth inequality in NCD management for all survey years stratifying by ethnic groups**

| Indicators                             | Year | Wealth inequality among Ethnic Minorities |                             |                          | Wealth inequality among Ethnic Majority (Kinh) |                            |                          |
|----------------------------------------|------|-------------------------------------------|-----------------------------|--------------------------|------------------------------------------------|----------------------------|--------------------------|
|                                        |      | RII_Other                                 | SII_Other                   | CnI_Other                | RII_Kinh                                       | SII_Kinh                   | CnI_Kinh                 |
| Non-use of tobacco                     | 2010 | 1.18 (1.09 to 1.27)**                     | 11.64 (6.35 to 16.93)**     | 0.02 (0.01 to 0.03)**    | 1.09 (1.06 to 1.12)**                          | 6.18 (4.03 to 8.33)**      | 0.01 (0.01 to 0.02)**    |
|                                        | 2015 | 1.29 (1.15 to 1.45)**                     | 18.87 (10.02 to 27.72)**    | 0.04 (0.02 to 0.05)**    | 1.12 (1.07 to 1.16)**                          | 8.71 (5.50 to 11.92)**     | 0.02 (0.01 to 0.02)**    |
| Non-harmful use of alcohol             | 2010 | 0.91 (0.83 to 0.98)*                      | -7.86 (-14.21 to -1.51)*    | -0.01 (-0.03 to -0.00)*  | 0.95 (0.92 to 0.98)**                          | -4.56 (-7.16 to -1.96)**   | -0.01 (-0.01 to -0.00)** |
|                                        | 2015 | 1.07 (0.90 to 1.27)                       | 5.12 (-7.68 to 17.91)       | 0.01 (-0.01 to 0.03)     | 0.99 (0.92 to 1.05)                            | -1.15 (-6.27 to 3.97)      | -0.00 (-0.01 to 0.01)    |
| Sufficient physical activity           | 2010 | 0.92 (0.88 to 0.97)**                     | -7.36 (-11.63 to -3.09)**   | -0.01 (-0.02 to -0.01)** | 0.86 (0.83 to 0.90)**                          | -10.92 (-14.04 to -7.81)** | -0.02 (-0.03 to -0.02)** |
|                                        | 2015 | 0.75 (0.66 to 0.86)**                     | -24.27 (-35.17 to -13.38)** | -0.04 (-0.06 to -0.02)** | 0.88 (0.81 to 0.96)**                          | -8.84 (-14.61 to -3.07)**  | -0.02 (-0.03 to -0.01)** |
| Sufficient use of fruit and vegetables | 2010 | 1.59 (1.16 to 2.17)**                     | 8.63 (2.60 to 14.67)**      | 0.07 (0.02 to 0.11)**    | 3.97 (3.42 to 4.61)**                          | 21.26 (18.93 to 23.59)**   | 0.21 (0.19 to 0.23)**    |
|                                        | 2015 | 2.21 (1.45 to 3.35)**                     | 25.02 (10.90 to 39.14)**    | 0.11 (0.05 to 0.17)**    | 2.44 (2.12 to 2.80)**                          | 41.75 (35.85 to 47.65)**   | 0.14 (0.12 to 0.17)**    |
| Non-overweight                         | 2010 | 0.89 (0.86 to 0.93)**                     | -10.78 (-14.49 to -7.06)**  | -0.02 (-0.02 to -0.01)** | 0.90 (0.87 to 0.92)**                          | -9.71 (-11.88 to -7.54)**  | -0.02 (-0.02 to -0.01)** |
|                                        | 2015 | 0.86 (0.76 to 0.98)*                      | -12.84 (-24.04 to -1.65)*   | -0.02 (-0.04 to -0.00)*  | 0.88 (0.83 to 0.94)**                          | -10.22 (-15.64 to -4.79)** | -0.02 (-0.03 to -0.01)** |
| Screening for cervical cancer          | 2015 | 3.30 (1.12 to 9.77)*                      | 14.18 (0.55 to 27.81)*      | 0.17 (0.02 to 0.32)*     | 3.47 (2.62 to 4.59)**                          | 33.81 (26.82 to 40.80)**   | 0.20 (0.15 to 0.24)**    |
| Treatment of diabetes                  | 2010 | 1.78 (0.87 to 3.61)                       | 10.00 (-1.45 to 21.44)      | 0.09 (-0.02 to 0.19)     | 1.01 (0.81 to 1.26)                            | 0.37 (-6.24 to 6.97)       | 0.00 (-0.03 to 0.04)     |
|                                        | 2015 | 3.22 (0.91 to 11.39)                      | 21.39 (-5.05 to 47.83)      | 0.16 (-0.02 to 0.34)     | 1.51 (1.06 to 2.14)*                           | 13.25 (1.70 to 24.80)*     | 0.06 (0.01 to 0.12)*     |
| Treatment of hypertension              | 2010 | NA                                        | NA                          | NA                       | 1.61 (1.09 to 2.36)*                           | 25.95 (4.78 to 47.12)*     | 0.07 (0.01 to 0.13)*     |
|                                        | 2015 | 5.30 (0.30 to 92.84)                      | 28.68 (-31.94 to 89.29)     | 0.24 (-0.20 to 0.68)     | 1.21 (0.64 to 2.30)                            | 8.66 (-18.23 to 35.55)     | 0.03 (-0.07 to 0.13)     |
| Treatment of high cholesterol          | 2015 | 2.40 (0.30 to 19.52)                      | 15.04 (-26.86 to 56.94)     | 0.13 (-0.21 to 0.47)     | 3.47 (1.80 to 6.67)**                          | 29.24 (14.19 to 44.30)**   | 0.19 (0.09 to 0.28)**    |

Note: \*\*\*, \*\*, \* Statistically significant results with P<0.001, P<0.01, and P<0.05, respectively; RII=Relative Index of Inequality; SII=Slope Index of Inequality; CnI=Concentrate Index of Inequality; CI=Confidence Interval;

**Table S26: Wealth inequality in NCD management for all survey years stratifying by living areas**

| Indicators                             | Year | Wealth inequality in Rural Areas |                             |                          | Wealth inequality in Urban Areas |                           |                          |
|----------------------------------------|------|----------------------------------|-----------------------------|--------------------------|----------------------------------|---------------------------|--------------------------|
|                                        |      | RII_Rural                        | SII_Rural                   | CnI_Rural                | RII_Urban                        | SII_Urban                 | CnI_Urban                |
| Non-use of tobacco                     | 2010 | 1.07 (1.04 to 1.11)**            | 5.20 (2.58 to 7.82)**       | 0.01 (0.01 to 0.02)**    | 1.10 (1.05 to 1.14)**            | 6.96 (3.90 to 10.03)**    | 0.01 (0.01 to 0.02)**    |
|                                        | 2015 | 1.13 (1.06 to 1.19)**            | 9.01 (4.66 to 13.37)**      | 0.02 (0.01 to 0.03)**    | 1.14 (1.08 to 1.20)**            | 10.31 (6.06 to 14.56)**   | 0.02 (0.01 to 0.03)**    |
| Non-harmful use of alcohol             | 2010 | 0.95 (0.91 to 0.98)**            | -4.49 (-7.48 to -1.50)**    | -0.01 (-0.01 to -0.00)** | 0.91 (0.87 to 0.96)**            | -7.65 (-11.63 to -3.67)** | -0.01 (-0.02 to -0.01)** |
|                                        | 2015 | 1.02 (0.93 to 1.11)              | 1.31 (-5.52 to 8.14)        | 0.00 (-0.01 to 0.02)     | 0.95 (0.88 to 1.03)              | -4.01 (-10.56 to 2.55)    | -0.01 (-0.02 to 0.01)    |
| Sufficient physical activity           | 2010 | 0.89 (0.86 to 0.93)**            | -9.44 (-12.42 to -6.45)**   | -0.02 (-0.02 to -0.01)** | 0.92 (0.85 to 1.00)              | -5.29 (-10.56 to -0.02)   | -0.01 (-0.03 to -0.00)*  |
|                                        | 2015 | 0.79 (0.73 to 0.86)**            | -17.57 (-24.21 to -10.93)** | -0.03 (-0.05 to -0.02)** | 0.86 (0.77 to 0.97)*             | -10.00 (-17.74 to -2.26)* | -0.02 (-0.04 to -0.01)*  |
| Sufficient use of fruit and vegetables | 2010 | 1.78 (1.48 to 2.14)**            | 8.20 (5.54 to 10.87)**      | 0.09 (0.06 to 0.12)**    | 3.92 (3.22 to 4.77)**            | 28.59 (24.68 to 32.50)**  | 0.21 (0.18 to 0.24)**    |
|                                        | 2015 | 2.66 (2.18 to 3.24)**            | 39.39 (31.88 to 46.89)**    | 0.16 (0.13 to 0.19)**    | 2.48 (2.07 to 2.98)**            | 43.38 (35.62 to 51.14)**  | 0.14 (0.12 to 0.17)**    |
| Non-overweight                         | 2010 | 0.93 (0.91 to 0.95)**            | -6.80 (-8.77 to -4.82)**    | -0.01 (-0.01 to -0.01)** | 0.92 (0.87 to 0.96)**            | -7.13 (-11.21 to -3.04)** | -0.01 (-0.02 to -0.01)** |
|                                        | 2015 | 0.91 (0.85 to 0.98)**            | -7.98 (-13.88 to -2.08)**   | -0.01 (-0.02 to -0.00)*  | 0.89 (0.81 to 0.99)*             | -8.88 (-16.74 to -1.03)*  | -0.02 (-0.03 to -0.00)*  |
| Screening for cervical cancer          | 2015 | 4.53 (2.94 to 6.99)**            | 29.73 (21.28 to 38.18)**    | 0.23 (0.17 to 0.29)**    | 3.36 (2.34 to 4.82)**            | 36.15 (27.03 to 45.28)**  | 0.19 (0.14 to 0.24)**    |
| Treatment of diabetes                  | 2010 | 1.07 (0.79 to 1.44)              | 1.39 (-5.10 to 7.87)        | 0.01 (-0.04 to 0.06)     | 0.75 (0.57 to 0.98)*             | -11.00 (-21.15 to -0.84)* | -0.05 (-0.09 to -0.00)*  |
|                                        | 2015 | 1.03 (0.59 to 1.78)              | 0.65 (-13.40 to 14.71)      | 0.00 (-0.08 to 0.09)     | 1.75 (1.13 to 2.71)*             | 22.82 (7.19 to 38.45)**   | 0.09 (0.03 to 0.16)**    |
| Treatment of hypertension              | 2010 | 1.96 (0.99 to 3.90)              | 30.22 (0.34 to 60.09)       | 0.11 (-0.00 to 0.21)     | 1.37 (0.86 to 2.19)              | 19.05 (-8.86 to 46.96)    | 0.05 (-0.02 to 0.12)     |
|                                        | 2015 | 1.82 (0.46 to 7.19)              | 13.70 (-22.11 to 49.51)     | 0.09 (-0.13 to 0.31)     | 0.92 (0.46 to 1.83)              | -4.45 (-37.32 to 28.42)   | -0.01 (-0.12 to 0.09)    |
| Treatment of high cholesterol          | 2015 | 1.45 (0.48 to 4.36)              | 5.82 (-13.59 to 25.24)      | 0.06 (-0.12 to 0.23)     | 3.13 (1.46 to 6.71)**            | 35.01 (14.30 to 55.71)**  | 0.17 (0.06 to 0.27)**    |

Note: \*\*\*, \*\*, \* Statistically significant results with P<0.001, P<0.01, and P<0.05, respectively; RII=Relative Index of Inequality; SII=Slope Index of Inequality; CnI=Concentrate Index of Inequality; CI=Confidence Interval;



**Table S27: Changes in inequality of NCD management coverage in Vietnam (2010–2015)**

| Indicators                             | Index | Gender inequality               | Ethnic inequality             | Urban-Rural Inequality        | Regional Inequality             | Wealth inequality            | Educational Inequality       |
|----------------------------------------|-------|---------------------------------|-------------------------------|-------------------------------|---------------------------------|------------------------------|------------------------------|
| Non-use of tobacco                     | RII   | 0.047 (0.031 to 0.062)***       | 0.046 (0.028 to 0.064)***     | -0.006 (-0.018 to 0.005)      | -0.036 (-0.046 to -0.026)***    | 0.042 (-0.004 to 0.089)      | 0.072 (0.062 to 0.082)***    |
|                                        | SII   | 8.046 (7.238 to 8.855)***       | 3.353 (2.034 to 4.671)***     | -0.203 (-1.088 to 0.682)      | -2.241 (-3.026 to -1.456)***    | 3.336 (-0.255 to 6.928)      | 5.282 (4.500 to 6.063)***    |
|                                        | CnI   | 0.021 (0.019 to 0.022)***       | 0.002 (0.001 to 0.003)***     | -0.000 (-0.002 to 0.001)      | -0.006 (-0.008 to -0.005)***    | 0.006 (-0.001 to 0.014)      | 0.010 (0.008 to 0.012)***    |
| Non-harmful use of alcohol             | RII   | -0.107 (-0.128 to -0.085)***    | 0.026 (0.003 to 0.049)        | 0.041 (0.025 to 0.057)***     | 0.027 (0.013 to 0.042)***       | 0.063 (-0.004 to 0.130)      | 0.098 (0.084 to 0.113)***    |
|                                        | SII   | -17.757 (-18.949 to -16.564)*** | 1.627 (-0.142 to 3.395)       | 2.748 (1.461 to 4.036)***     | 1.746 (0.609 to 2.883)**        | 5.173 (-0.099 to 10.445)     | 8.448 (7.312 to 9.584)***    |
|                                        | CnI   | -0.033 (-0.034 to -0.031)***    | 0.002 (0.000 to 0.003)*       | 0.005 (0.003 to 0.007)***     | 0.004 (0.002 to 0.007)***       | 0.010 (-0.001 to 0.021)      | 0.015 (0.013 to 0.017)***    |
| Sufficient physical activity           | RII   | 0.274 (0.255 to 0.293)***       | 0.004 (-0.014 to 0.022)       | 0.096 (0.075 to 0.116)***     | -0.227 (-0.243 to -0.211)***    | -0.039 (-0.118 to 0.040)     | -0.036 (-0.053 to -0.019)*** |
|                                        | SII   | 16.208 (14.826 to 17.590)***    | 3.104 (1.624 to 4.585)***     | 11.305 (9.888 to 12.721)***   | -14.419 (-15.576 to -13.261)*** | -2.196 (-7.919 to 3.528)     | -2.282 (-3.515 to -1.050)*** |
|                                        | CnI   | 0.028 (0.026 to 0.031)***       | 0.000 (-0.002 to 0.002)       | 0.011 (0.008 to 0.013)***     | -0.034 (-0.036 to -0.031)***    | -0.007 (-0.019 to 0.006)     | -0.006 (-0.008 to -0.003)*** |
| Sufficient use of fruit and vegetables | RII   | -0.248 (-0.294 to -0.203)***    | 1.246 (1.180 to 1.312)***     | -0.792 (-0.836 to -0.747)***  | -3.618 (-3.658 to -3.577)***    | -0.398 (-0.585 to -0.210)    | -1.844 (-1.884 to -1.804)*** |
|                                        | SII   | -18.748 (-20.230 to -17.266)*** | 31.204 (29.295 to 33.113)***  | 1.649 (0.148 to 3.150)        | -10.631 (-11.926 to -9.336)***  | 25.635 (19.886 to 31.385)*** | 12.868 (11.603 to 14.134)*** |
|                                        | CnI   | -0.042 (-0.047 to -0.036)***    | 0.059 (0.055 to 0.063)***     | -0.050 (-0.055 to -0.044)***  | -0.189 (-0.195 to -0.183)***    | -0.012 (-0.041 to 0.016)     | -0.085 (-0.092 to -0.079)*** |
| Non-overweight                         | RII   | 0.051 (0.036 to 0.066)***       | -0.007 (-0.024 to 0.009)      | 0.038 (0.022 to 0.054)***     | 0.031 (0.018 to 0.044)***       | -0.025 (-0.087 to 0.036)     | 0.115 (0.102 to 0.128)***    |
|                                        | SII   | 3.999 (2.751 to 5.247)***       | 0.091 (-1.351 to 1.533)       | 4.970 (3.677 to 6.262)***     | 0.806 (-0.269 to 1.880)         | -1.500 (-6.619 to 3.620)     | 10.198 (9.093 to 11.303)***  |
|                                        | CnI   | 0.006 (0.004 to 0.008)***       | -0.001 (-0.003 to 0.000)      | 0.003 (0.001 to 0.005)***     | -0.001 (-0.003 to 0.002)        | -0.003 (-0.012 to 0.007)     | 0.021 (0.018 to 0.023)***    |
| Treatment of diabetes                  | RII   | 0.284 (0.188 to 0.380)***       | -0.637 (-0.815 to -0.460)     | -0.918 (-1.015 to -0.822)***  | -1.266 (-1.352 to -1.180)***    | 0.598 (0.200 to 0.996)       | 0.483 (0.399 to 0.568)***    |
|                                        | SII   | 16.029 (13.136 to 18.922)***    | -0.080 (-3.569 to 3.409)      | -8.490 (-11.408 to -5.573)*** | -5.912 (-8.397 to -3.427)***    | 12.401 (0.510 to 24.292)     | 13.187 (10.622 to 15.751)*** |
|                                        | CnI   | 0.080 (0.069 to 0.092)***       | -0.020 (-0.029 to -0.011)***  | -0.043 (-0.055 to -0.031)***  | -0.070 (-0.083 to -0.057)***    | 0.061 (-0.002 to 0.124)      | 0.073 (0.060 to 0.087)***    |
| Treatment of hypertension              | RII   | -0.033 (-0.218 to 0.152)        | -0.259 (-0.689 to 0.171)      | 1.436 (1.225 to 1.646)***     | 0.657 (0.487 to 0.827)*         | -0.166 (-0.908 to 0.577)     | 0.155 (-0.003 to 0.313)      |
|                                        | SII   | 3.495 (-4.204 to 11.194)        | -16.168 (-26.358 to -5.979)** | 9.227 (1.688 to 16.766)*      | -7.386 (-13.774 to -0.998)*     | -9.683 (-41.138 to 21.772)   | 7.998 (1.169 to 14.826)*     |
|                                        | CnI   | -0.008 (-0.030 to 0.015)        | 0.010 (-0.005 to 0.025)       | 0.051 (0.030 to 0.073)***     | 0.018 (-0.006 to 0.042)         | -0.008 (-0.125 to 0.109)     | 0.024 (-0.001 to 0.049)      |

Notes: \*\*\*, \*\*, \* Statistically significant results with P<0.001, P<0.01, and P<0.05, respectively; RII=Relative Index of Inequality; SII=Slope Index of Inequality; CnI=Concentrate Index of Inequality; CI=Confidence Interval;

**Table S28: Changes in Wealth inequality in NCD management, 2010-2015, stratifying by genders**

| Indicators                             | Changes in Social-Economic Inequality among Women |                           |                          | Changes in Social-Economic Inequality among Men |                          |                        |
|----------------------------------------|---------------------------------------------------|---------------------------|--------------------------|-------------------------------------------------|--------------------------|------------------------|
|                                        | RII_Women                                         | SII_Women                 | CnI_Women                | RII_Men                                         | SII_Men                  | CnI_Men                |
| Non-use of tobacco                     | -0.02 (-0.03 to -0.01)**                          | -1.85 (-3.12 to -0.58)**  | -0.00 (-0.01 to -0.00)** | 0.33 (0.20 to 0.46)**                           | 13.11 (6.75 to 19.47)*** | 0.04 (0.01 to 0.06)*** |
| Non-harmful use of alcohol             | 0.00 (-0.02 to 0.03)                              | 0.21 (-2.09 to 2.52)      | 0.00 (-0.00 to 0.00)     | 0.27 (0.10 to 0.45)**                           | 14.29 (4.77 to 23.80)**  | 0.04 (0.01 to 0.07)**  |
| Sufficient physical activity           | -0.04 (-0.15 to 0.08)                             | -0.71 (-8.66 to 7.24)     | -0.01 (-0.02 to 0.01)    | -0.06 (-0.16 to 0.05)                           | -5.15 (-13.09 to 2.79)   | -0.01 (-0.03 to 0.01)  |
| Sufficient use of fruit and vegetables | -0.15 (-0.39 to 0.09)                             | 35.62 (28.00 to 43.23)*** | 0.00 (-0.03 to 0.04)     | -0.70 (-1.01 to -0.40)                          | 14.49 (5.93 to 23.05)*** | -0.03 (-0.08 to 0.01)  |
| Non-overweight                         | -0.01 (-0.10 to 0.07)                             | -0.28 (-7.35 to 6.79)     | -0.00 (-0.01 to 0.01)    | -0.04 (-0.13 to 0.04)                           | -3.71 (-10.98 to 3.57)   | -0.01 (-0.02 to 0.01)  |
| Treatment of diabetes                  | 0.01 (-0.50 to 0.52)                              | -0.71 (-18.81 to 17.39)   | 0.00 (-0.08 to 0.08)     | 1.68 (1.04 to 2.32)*                            | 23.56 (8.34 to 38.78)**  | 0.12 (0.02 to 0.22)*   |
| Treatment of hypertension              | -0.38 (-1.29 to 0.53)                             | -19.62 (-62.38 to 23.15)  | -0.05 (-0.20 to 0.10)    | -0.05 (-1.31 to 1.21)                           | 4.97 (-37.46 to 47.41)   | 0.04 (-0.16 to 0.23)   |

Note: \*\*\*, \*\*, \* Statistically significant results with P<0.001, P<0.01, and P<0.05, respectively; RII=Relative Index of Inequality; SII=Slope Index of Inequality; CnI=Concentrate Index of Inequality; CI=Confidence Interval;

**Table S29: Changes in Wealth inequality in NCD management, 2010-2015, stratifying by ethnic groups**

| Indicators                             | Changes in Social-Economic Inequality among Ethnic Minorities |                            |                          | Changes in Social-Economic Inequality among Ethnic Majority |                           |                           |
|----------------------------------------|---------------------------------------------------------------|----------------------------|--------------------------|-------------------------------------------------------------|---------------------------|---------------------------|
|                                        | RII_Other                                                     | SII_Other                  | CnI_Other                | RII_Kinh                                                    | SII_Kinh                  | CnI_Kinh                  |
| Non-use of tobacco                     | 0.11 (-0.03 to 0.25)                                          | 7.23 (-3.08 to 17.54)      | 0.01 (-0.01 to 0.03)     | 0.03 (-0.02 to 0.08)                                        | 2.53 (-1.33 to 6.40)      | 0.00 (-0.00 to 0.01)      |
| Non-harmful use of alcohol             | 0.17 (-0.02 to 0.35)                                          | 12.97 (-1.31 to 27.26)     | 0.02 (-0.00 to 0.05)     | 0.04 (-0.03 to 0.11)                                        | 3.41 (-2.33 to 9.15)      | 0.01 (-0.01 to 0.02)      |
| Sufficient physical activity           | -0.17 (-0.31 to -0.03)**                                      | -16.91 (-28.61 to -5.21)** | -0.03 (-0.04 to -0.01)** | 0.02 (-0.08 to 0.11)                                        | 2.08 (-4.47 to 8.64)      | 0.00 (-0.01 to 0.02)      |
| Sufficient use of fruit and vegetables | 0.62 (0.10 to 1.14)                                           | 16.39 (1.03 to 31.74)*     | 0.04 (-0.03 to 0.12)     | -1.53 (-1.73 to -1.33)***                                   | 20.49 (14.15 to 26.83)*** | -0.06 (-0.09 to -0.03)*** |
| Non-overweight                         | -0.03 (-0.17 to 0.11)                                         | -2.06 (-13.86 to 9.73)     | -0.00 (-0.02 to 0.02)    | -0.01 (-0.08 to 0.06)                                       | -0.51 (-6.35 to 5.34)     | -0.00 (-0.01 to 0.01)     |
| Treatment of diabetes                  | 1.44 (-0.00 to 2.89)                                          | 11.39 (-17.42 to 40.20)    | 0.07 (-0.13 to 0.28)     | 0.50 (0.08 to 0.91)                                         | 12.89 (-0.42 to 26.19)    | 0.06 (-0.00 to 0.13)      |
| Treatment of hypertension              | NA (NA to NA)NA                                               | NA (NA to NA)NA            | NA (NA to NA)NA          | -0.39 (-1.14 to 0.35)                                       | -17.29 (-51.51 to 16.94)  | -0.04 (-0.16 to 0.08)     |

Note: \*\*\*, \*\*, \* Statistically significant results with P<0.001, P<0.01, and P<0.05, respectively; RII=Relative Index of Inequality; SII=Slope Index of Inequality; CnI=Concentrate Index of Inequality; CI=Confidence Interval;

**Table S30: Changes in Wealth inequality in NCD management, 2010-2015, stratifying by living areas**

| Indicators                             | Changes in Social-Economic Inequality in Rural Areas |                           |                         | Changes in Social-Economic Inequality in Urban Areas |                           |                          |
|----------------------------------------|------------------------------------------------------|---------------------------|-------------------------|------------------------------------------------------|---------------------------|--------------------------|
|                                        | RII_rural                                            | SII_rural                 | CnI_rural               | RII_urban                                            | SII_urban                 | CnI_urban                |
| Non-use of tobacco                     | 0.05 (-0.02 to 0.12)                                 | 3.81 (-1.27 to 8.89)      | 0.01 (-0.00 to 0.02)    | 0.04 (-0.02 to 0.11)                                 | 3.35 (-1.90 to 8.59)      | 0.01 (-0.00 to 0.02)     |
| Non-harmful use of alcohol             | 0.07 (-0.03 to 0.17)                                 | 5.80 (-1.66 to 13.25)     | 0.01 (-0.00 to 0.03)    | 0.04 (-0.06 to 0.13)                                 | 3.64 (-4.02 to 11.31)     | 0.01 (-0.01 to 0.02)     |
| Sufficient physical activity           | -0.10 (-0.20 to -0.01)*                              | -8.14 (-15.41 to -0.86)*  | -0.01 (-0.03 to -0.00)* | -0.06 (-0.20 to 0.08)                                | -4.71 (-14.08 to 4.65)    | -0.01 (-0.03 to 0.01)    |
| Sufficient use of fruit and vegetables | 0.88 (0.61 to 1.15)**                                | 31.18 (23.22 to 39.15)*** | 0.07 (0.03 to 0.11)**   | -1.43 (-1.70 to -1.17)***                            | 14.79 (6.10 to 23.49)***  | -0.06 (-0.10 to -0.03)** |
| Non-overweight                         | -0.02 (-0.09 to 0.05)                                | -1.18 (-7.40 to 5.04)     | -0.00 (-0.01 to 0.01)   | -0.03 (-0.14 to 0.09)                                | -1.76 (-10.61 to 7.10)    | -0.00 (-0.02 to 0.01)    |
| Treatment of diabetes                  | -0.04 (-0.66 to 0.59)                                | -0.73 (-16.21 to 14.74)   | -0.01 (-0.10 to 0.09)   | 1.00 (0.49 to 1.51)**                                | 33.82 (15.18 to 52.46)*** | 0.14 (0.06 to 0.22)***   |
| Treatment of hypertension              | -0.14 (-1.68 to 1.39)                                | -16.52 (-63.15 to 30.12)  | -0.01 (-0.26 to 0.23)   | -0.45 (-1.28 to 0.37)                                | -23.50 (-66.62 to 19.62)  | -0.06 (-0.19 to 0.07)    |

Note: \*\*\*, \*\*, \* Statistically significant results with P<0.001, P<0.01, and P<0.05, respectively; RII=Relative Index of Inequality; SII=Slope Index of Inequality; CnI=Concentrate Index of Inequality; CI=Confidence Interval;

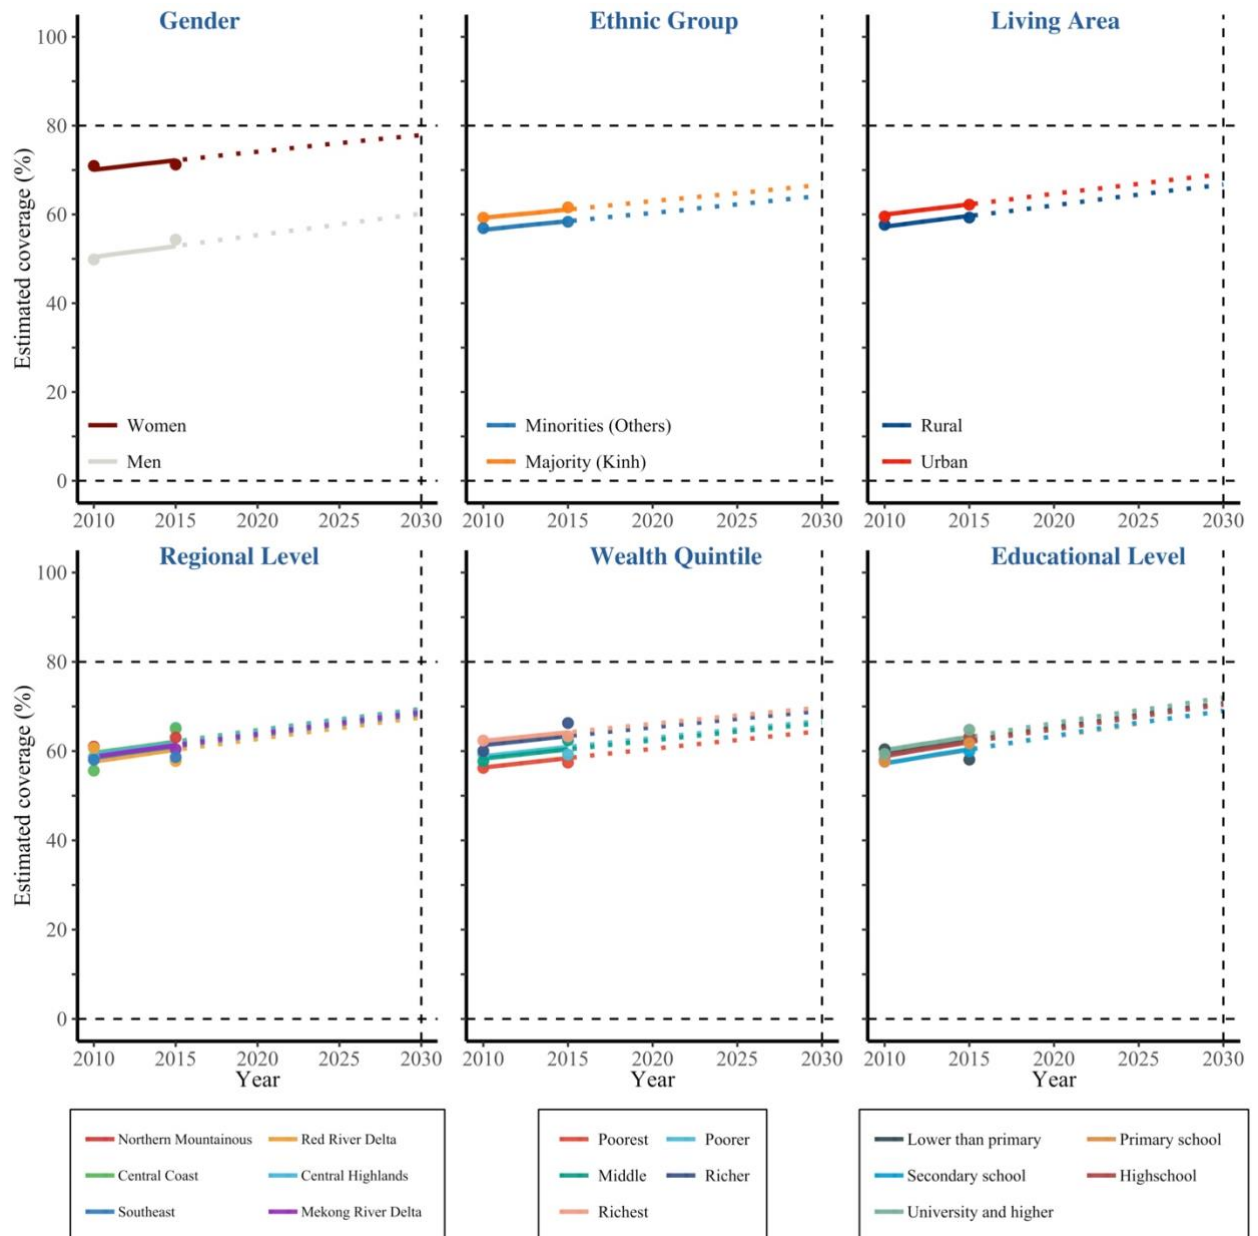

**Figure S1: Trends in and projections of coverage of NCD composite coverage**

The coloured dots are the observed coverages. The solid lines are the estimated trends to 2015. The dashed lines are the projected trends in future from 2015. The shaded areas are the 95% Credible Intervals; the horizontal dotted lines present the UHC target of 80% (at the top) and 95% (bottom) coverage.

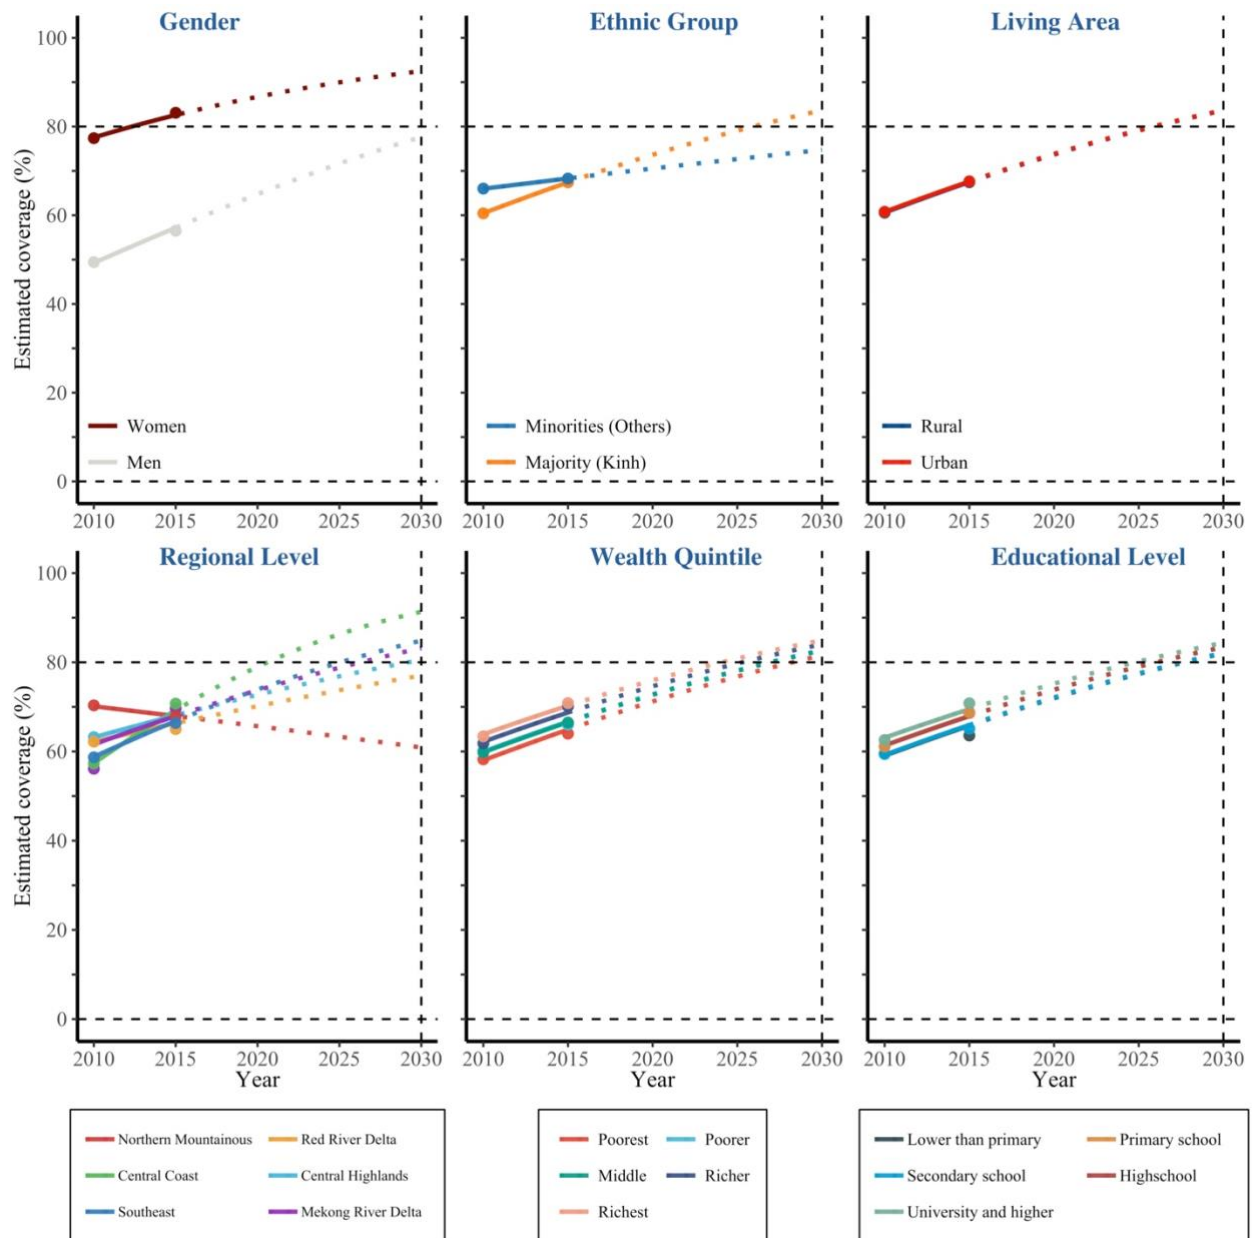

**Figure S2: Trends in and projections of coverage of NCD composite prevention**

The coloured dots are the observed coverages. The solid lines are the estimated trends to 2015. The dashed lines are the projected trends in future from 2015. The shaded areas are the 95% Credible Intervals; the horizontal dotted lines present the UHC target of 80% (at the top) and 95% (bottom) coverage.

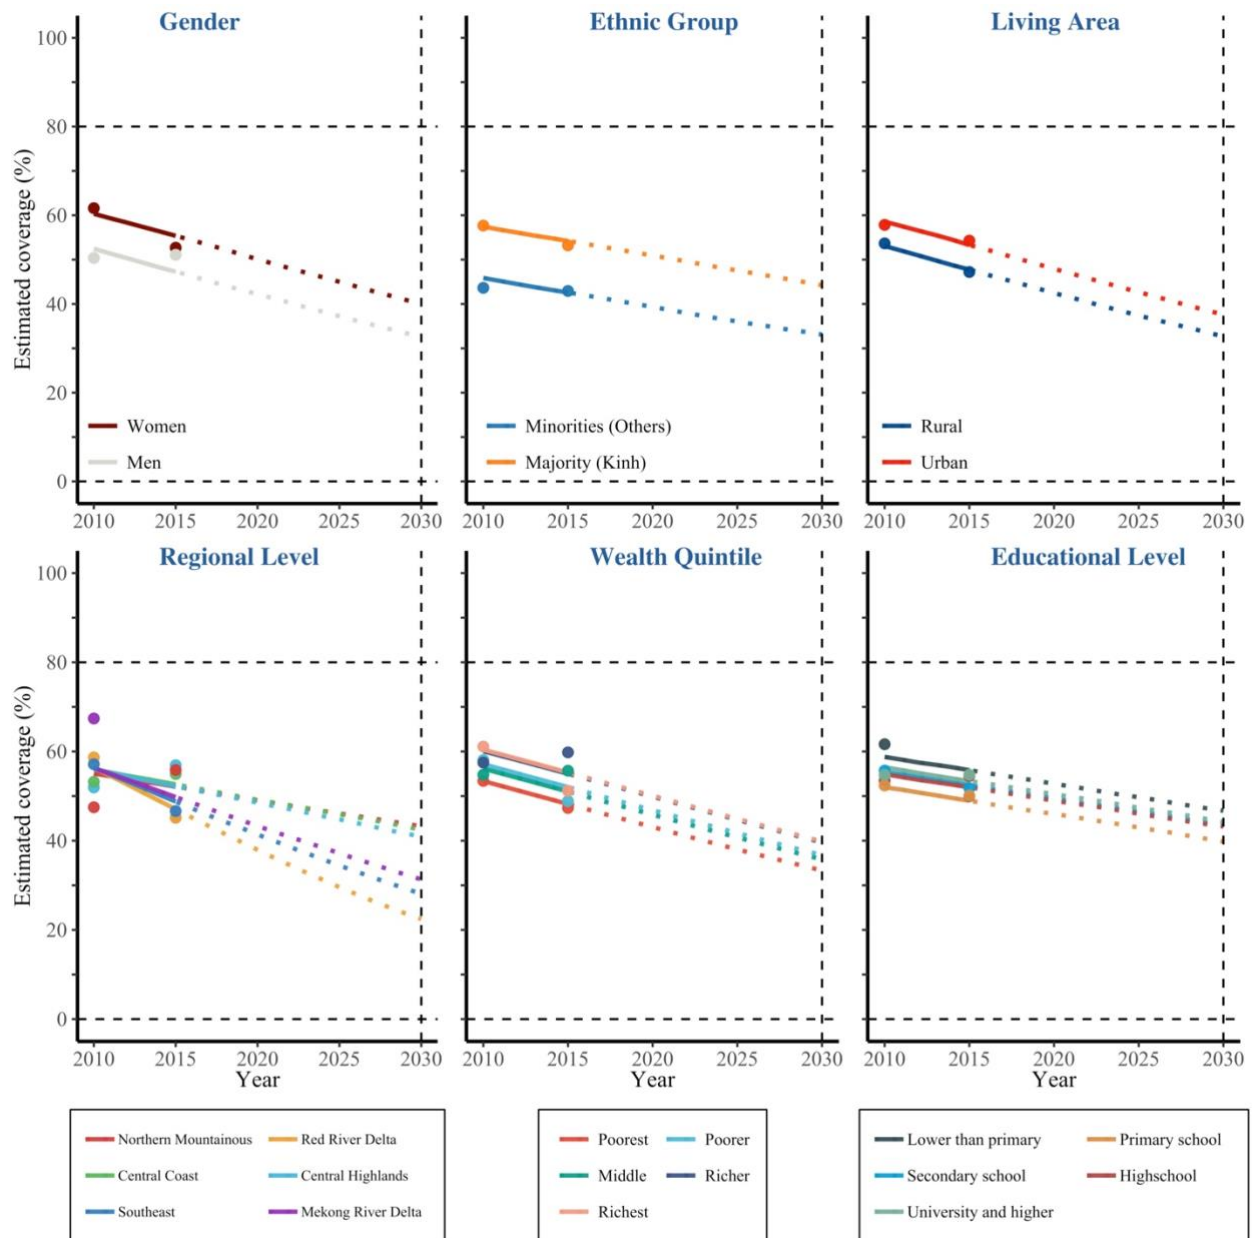

**Figure S3: Trends in and projections of coverage of NCD composite treatment**

The coloured dots are the observed coverages. The solid lines are the estimated trends to 2015. The dashed lines are the projected trends in future from 2015. The shaded areas are the 95% Credible Intervals; the horizontal dotted lines present the UHC target of 80% (at the top) and 95% (bottom) coverage.

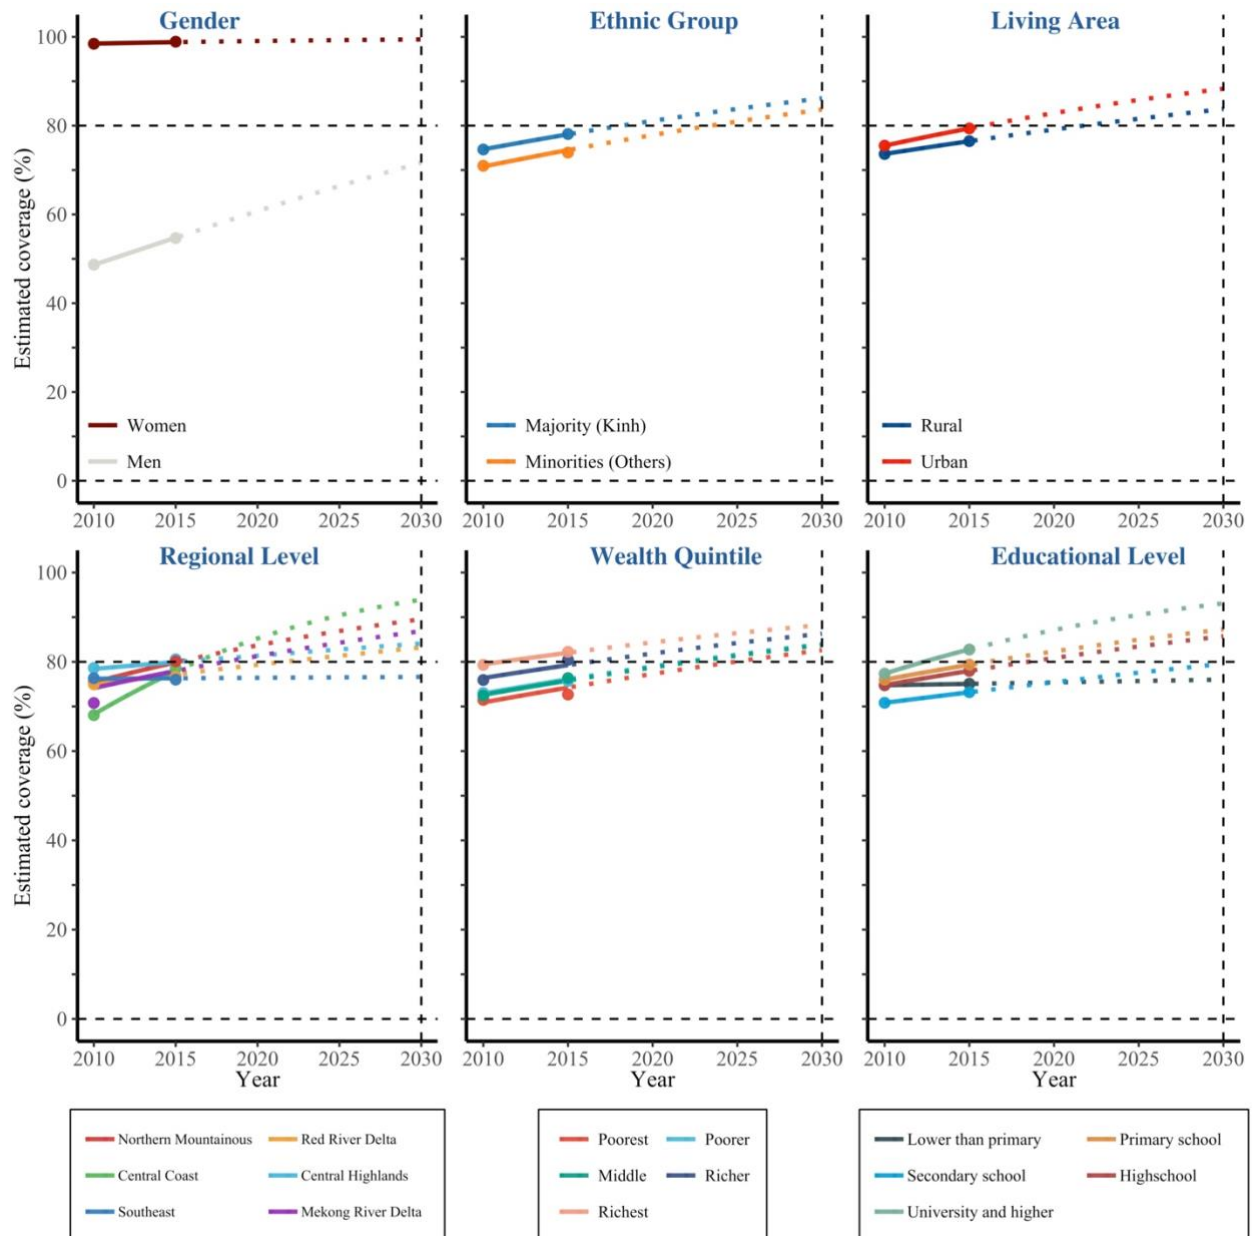

**Figure S4: Trends in and projections of coverage of non-use of tobacco**

The coloured dots are the observed coverages. The solid lines are the estimated trends to 2015. The dashed lines are the projected trends in future from 2015. The shaded areas are the 95% Credible Intervals; the horizontal dotted lines present the UHC target of 80% (at the top) and 95% (bottom) coverage.



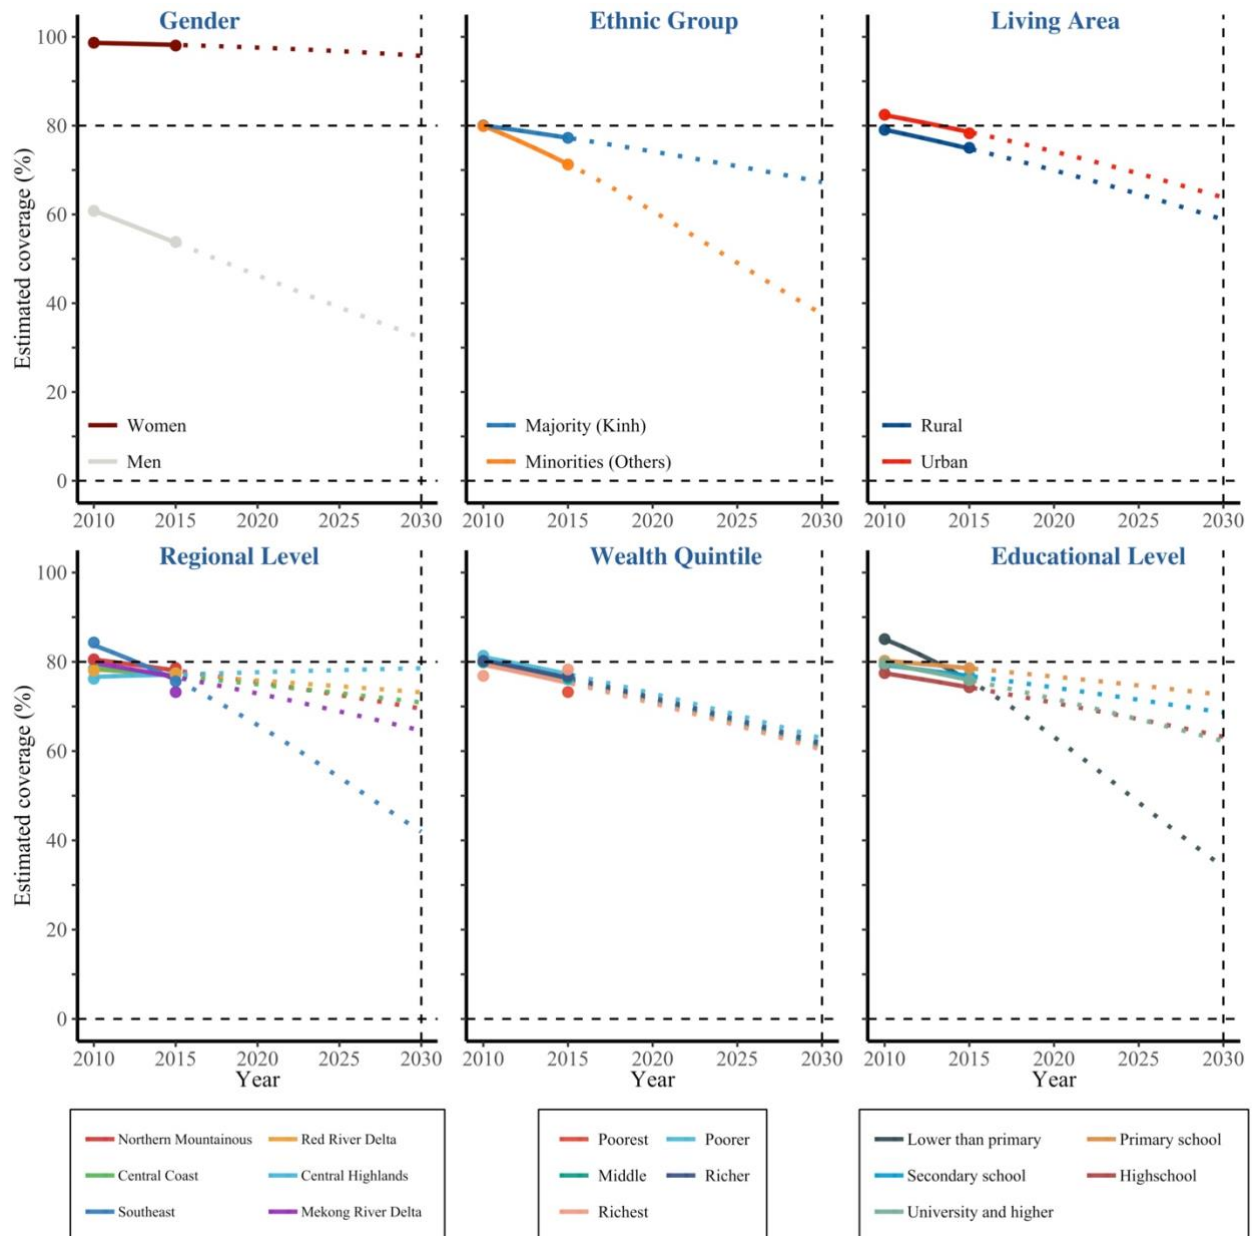

**Figure S5: Trends in and projections of coverage of non-harmful use of alcohol**

The coloured dots are the observed coverages. The solid lines are the estimated trends to 2015. The dashed lines are the projected trends in future from 2015. The shaded areas are the 95% Credible Intervals; the horizontal dotted lines present the UHC target of 80% (at the top) and 95% (bottom) coverage.

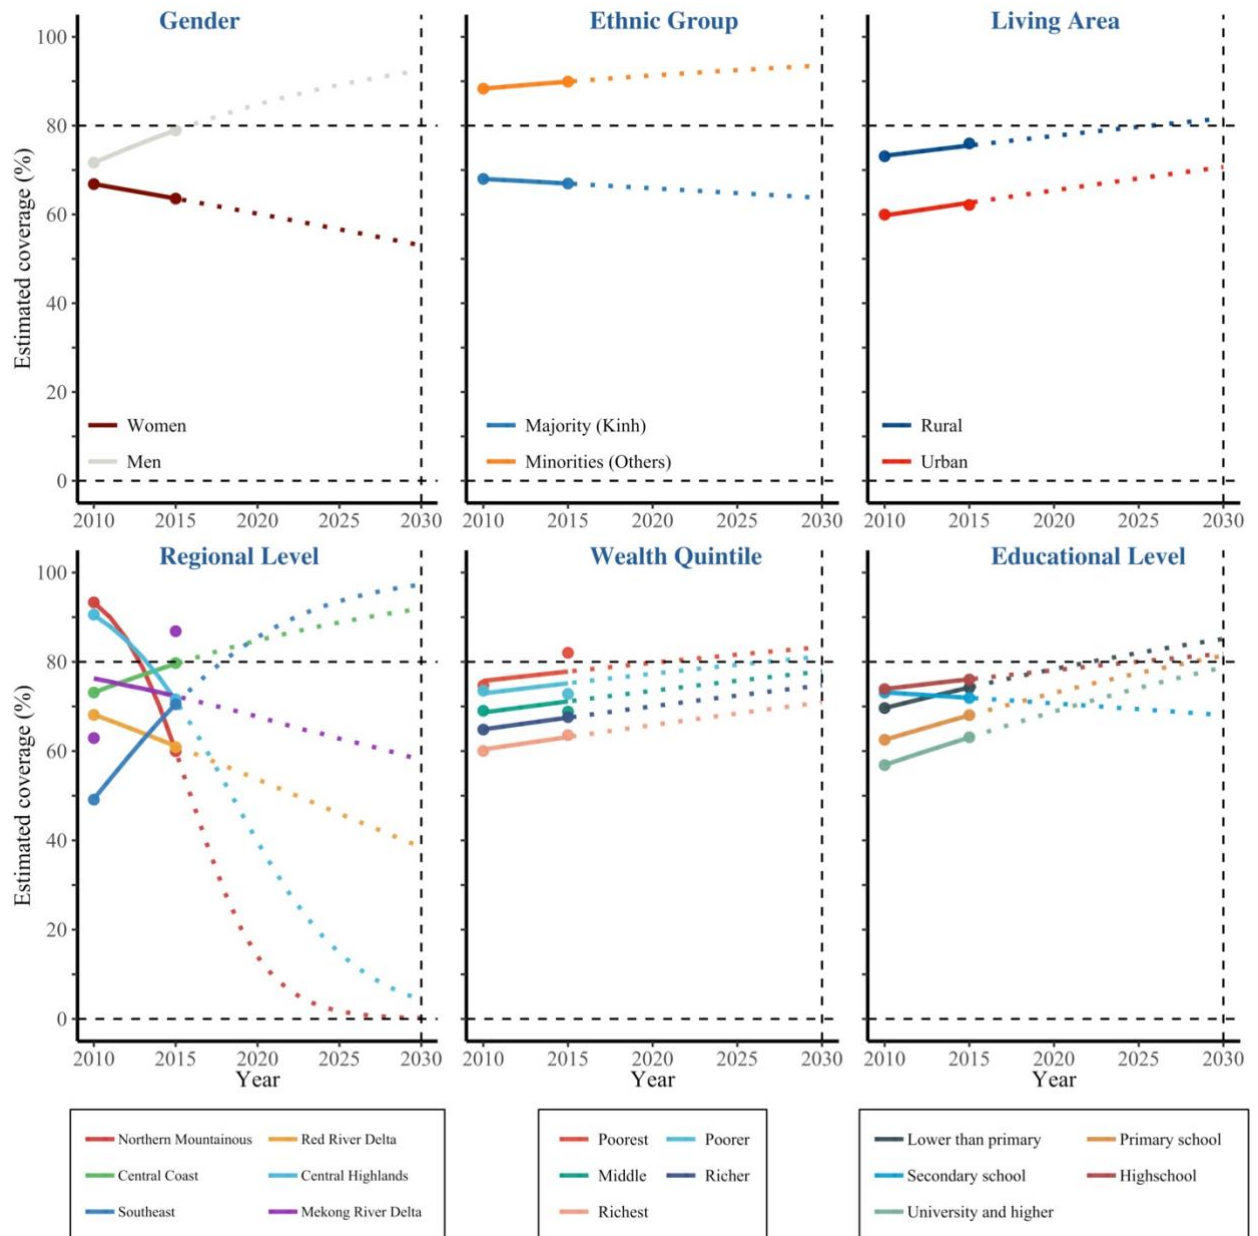

**Figure S6: Trends in and projections of coverage of sufficient physical activity**

The coloured dots are the observed coverages. The solid lines are the estimated trends to 2015. The dashed lines are the projected trends in future from 2015. The shaded areas are the 95% Credible Intervals; the horizontal dotted lines present the UHC target of 80% (at the top) and 95% (bottom) coverage.

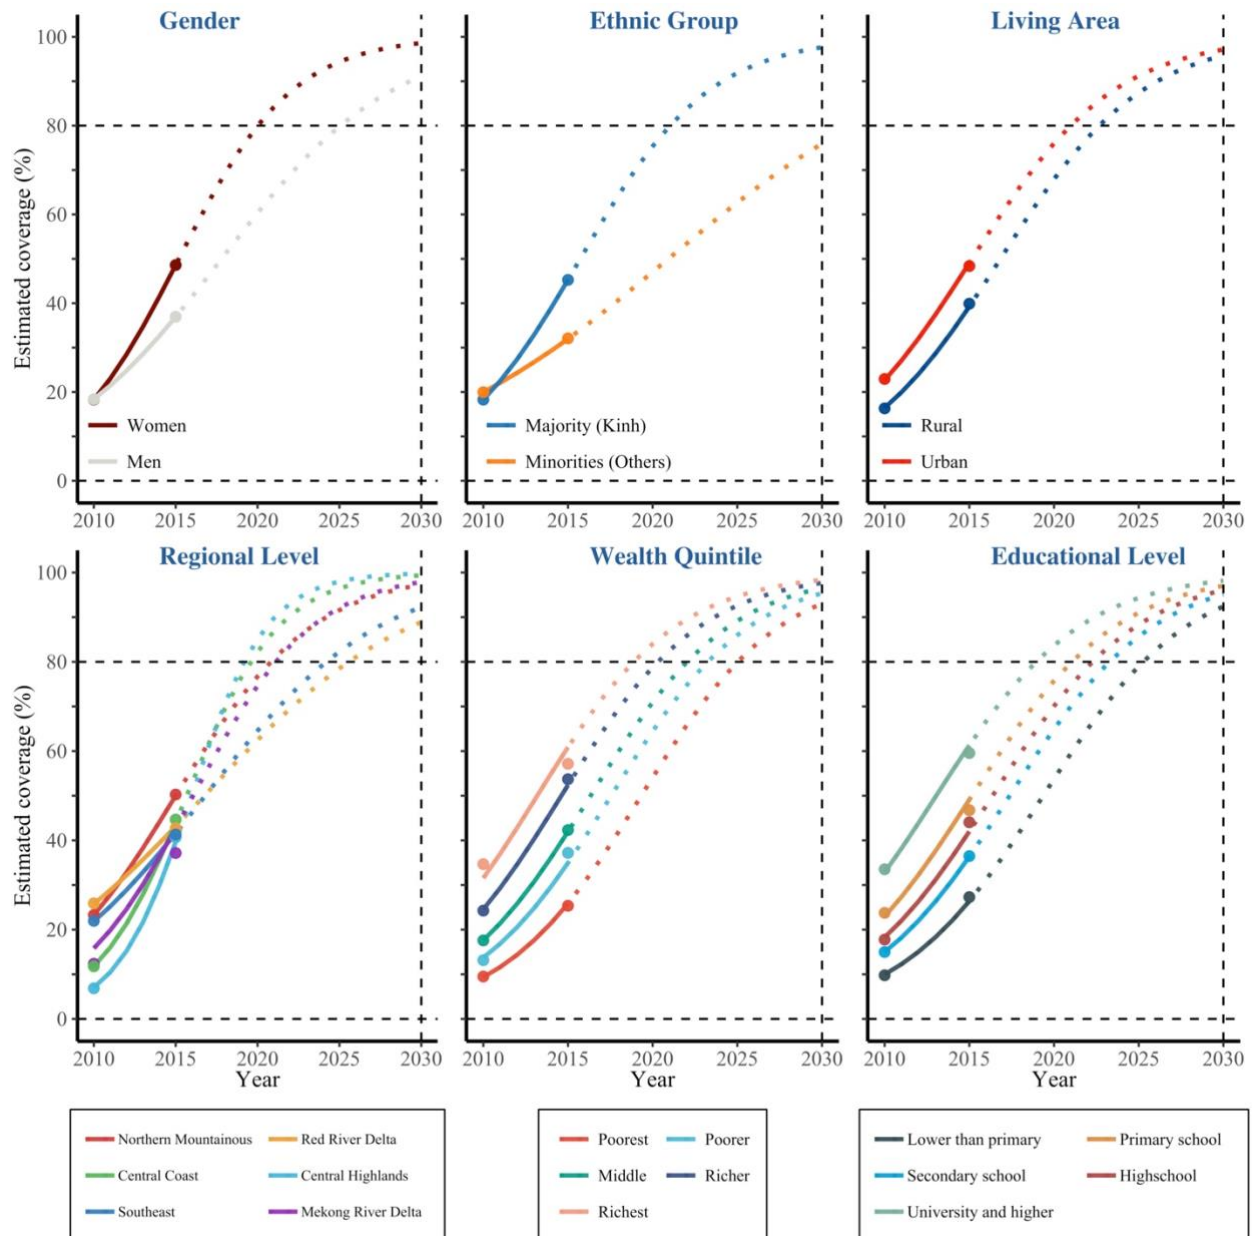

**Figure S7: Trends in and projections of coverage of sufficient use of fruit and vegetables**

The coloured dots are the observed coverages. The solid lines are the estimated trends to 2015. The dashed lines are the projected trends in future from 2015. The shaded areas are the 95% Credible Intervals; the horizontal dotted lines present the UHC target of 80% (at the top) and 95% (bottom) coverage.

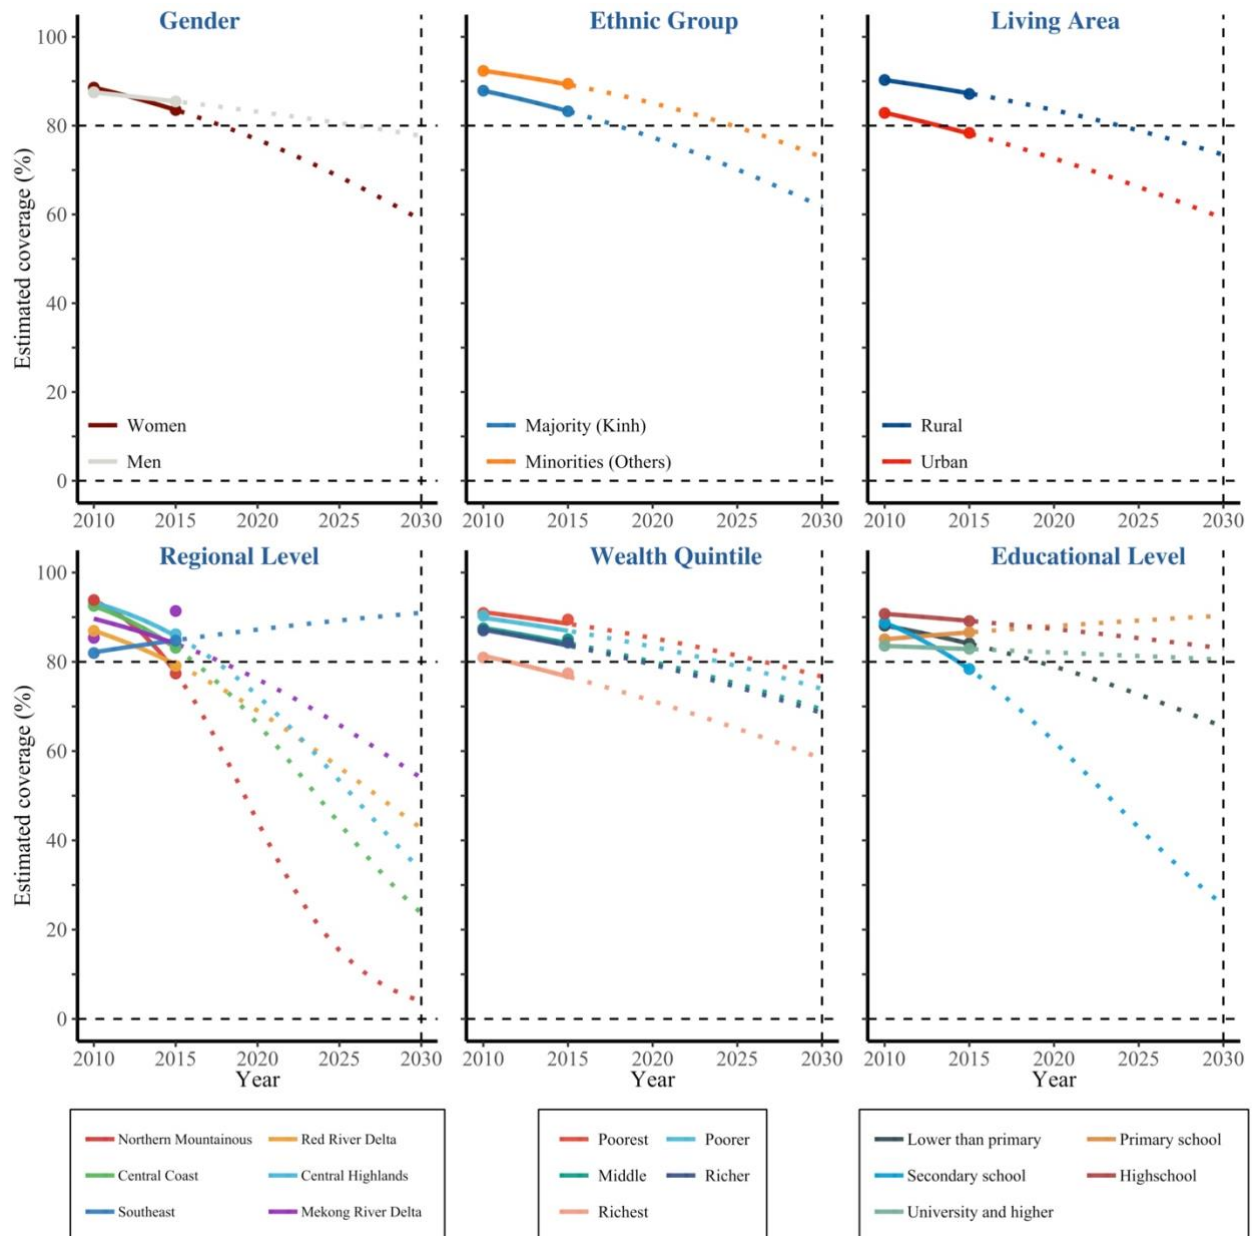

**Figure S8: Trends in and projections of coverage of non-overweight**

The coloured dots are the observed coverages. The solid lines are the estimated trends to 2015. The dashed lines are the projected trends in future from 2015. The shaded areas are the 95% Credible Intervals; the horizontal dotted lines present the UHC target of 80% (at the top) and 95% (bottom) coverage.

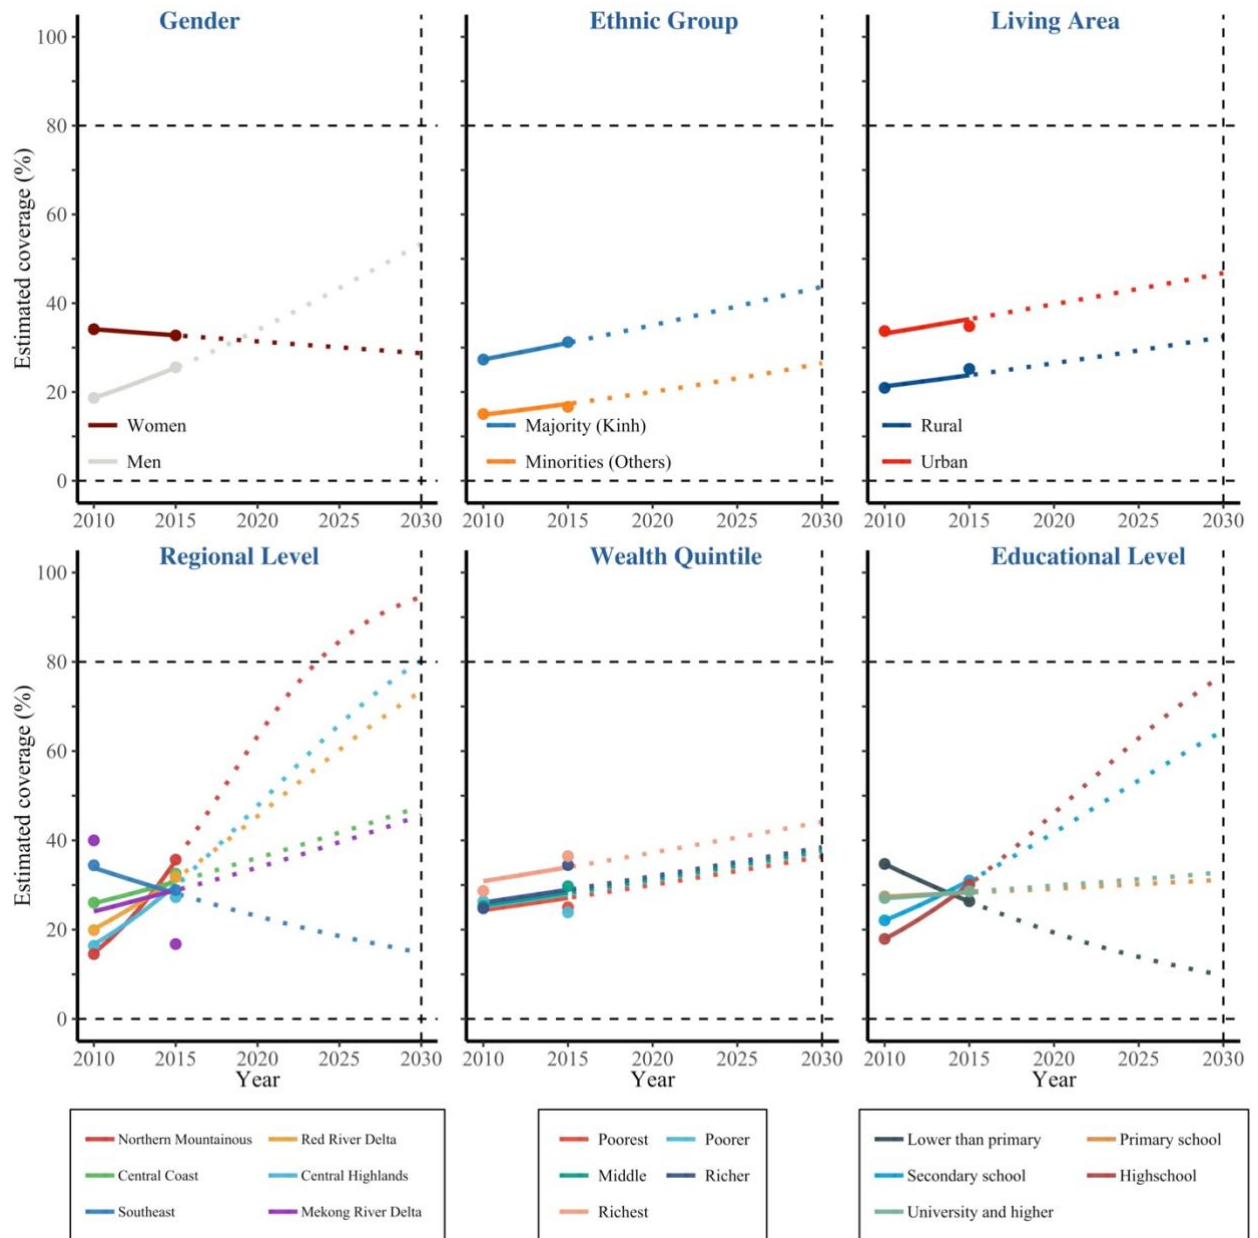

**Figure S9: Trends in and projections of coverage of treatment of hypertension**

The coloured dots are the observed coverages. The solid lines are the estimated trends to 2015. The dashed lines are the projected trends in future from 2015. The shaded areas are the 95% Credible Intervals; the horizontal dotted lines present the UHC target of 80% (at the top) and 95% (bottom) coverage.

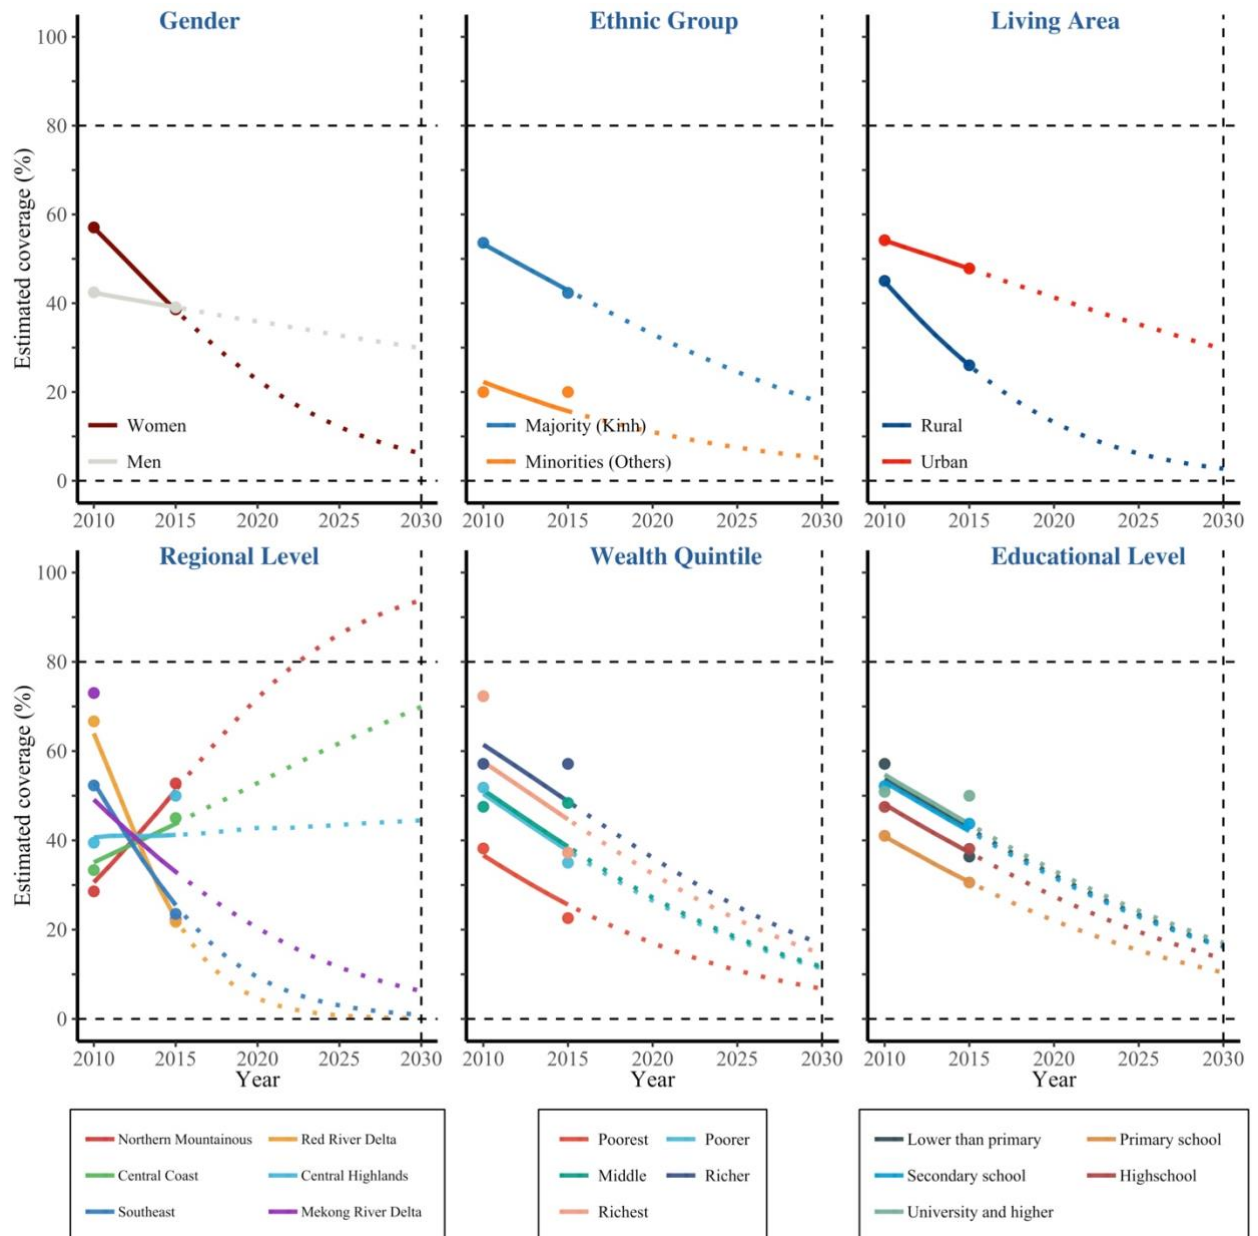

**Figure S10: Trends in and projections of coverage of treatment of diabetes**

The coloured dots are the observed coverages. The solid lines are the estimated trends to 2015. The dashed lines are the projected trends in future from 2015. The shaded areas are the 95% Credible Intervals; the horizontal dotted lines present the UHC target of 80% (at the top) and 95% (bottom) coverage.

### **Process of Principal Component Analysis**

We performed principal component analysis in Stata, and presented the process with excuted commands, explanations, and outcomes as below.



```

-----
> -
  name: <unnamed>
  log: /Users/bongbaymauxanh/Dropbox (Stuart研)/02_PROJECTS/01_Ongoing Projects/NCD in Vietnam/Data
  log type: text
  opened on: 9 May 2022, 13:05:35

.
. ***** GATS 2010
.
. *** Import data set of GATS2010
. use "gats10.dta", clear
(Written by R.          )

```

```

.
. *** Make wscore0 for general
. * Check frequency of each variables
. summarize electric toilet fix_phone cell_phone tivi radio fridge car motor wash airc gene grinder boat

```

| Variable   | Obs   | Mean     | Std. Dev. | Min | Max |
|------------|-------|----------|-----------|-----|-----|
| electric   | 9,925 | .9891184 | .1037511  | 0   | 1   |
| toilet     | 9,925 | .5768262 | .4940874  | 0   | 1   |
| fix_phone  | 9,925 | .5276574 | .4992596  | 0   | 1   |
| cell_phone | 9,925 | .8242821 | .3805991  | 0   | 1   |
| tivi       | 9,925 | .9193955 | .2722405  | 0   | 1   |
| radio      | 9,925 | .2448363 | .4300117  | 0   | 1   |
| fridge     | 9,925 | .4606549 | .4984747  | 0   | 1   |
| car        | 9,925 | .0378841 | .1909256  | 0   | 1   |
| motor      | 9,925 | .790529  | .4069516  | 0   | 1   |
| wash       | 9,925 | .2423174 | .4285069  | 0   | 1   |
| airc       | 9,925 | .0982368 | .2976495  | 0   | 1   |
| gene       | 9,925 | .0381864 | .1916557  | 0   | 1   |
| grinder    | 9,925 | .0308312 | .172869   | 0   | 1   |
| boat       | 9,925 | .0424181 | .2015513  | 0   | 1   |
| pc         | 9,925 | .2332494 | .4229209  | 0   | 1   |
| internet   | 9,925 | .1528463 | .3598575  | 0   | 1   |

```

. * Remove 5 variables not in 5%-95% including electric, car, gene, grinder, boat
.
. * Run pca for general (only for frequency 5% - 95%)
. pca toilet fix_phone cell_phone tivi radio fridge motor wash airc pc internet

```

```

Principal components/correlation      Number of obs = 9,925
                                      Number of comp. = 11
                                      Trace = 11
Rotation: (unrotated = principal)    Rho = 1.0000

```

| Component | Eigenvalue | Difference | Proportion | Cumulative |
|-----------|------------|------------|------------|------------|
| Comp1     | 3.98439    | 2.53989    | 0.3622     | 0.3622     |
| Comp2     | 1.4445     | .466827    | 0.1313     | 0.4935     |
| Comp3     | .977669    | .061093    | 0.0889     | 0.5824     |
| Comp4     | .916576    | .147422    | 0.0833     | 0.6657     |
| Comp5     | .769154    | .0826299   | 0.0699     | 0.7357     |
| Comp6     | .686524    | .0738032   | 0.0624     | 0.7981     |
| Comp7     | .612721    | .108609    | 0.0557     | 0.8538     |
| Comp8     | .504113    | .0247932   | 0.0458     | 0.8996     |
| Comp9     | .479319    | .0905977   | 0.0436     | 0.9432     |
| Comp10    | .388722    | .152402    | 0.0353     | 0.9785     |
| Comp11    | .236319    | .          | 0.0215     | 1.0000     |

Principal components (eigenvectors)

| Variable   | Comp1  | Comp2   | Comp3   | Comp4   | Comp5   | Comp6   | Comp7   | Comp8   | Com   |
|------------|--------|---------|---------|---------|---------|---------|---------|---------|-------|
| toilet     | 0.3214 | 0.0628  | 0.0242  | -0.1100 | -0.6631 | -0.0483 | 0.4023  | 0.1326  | 0.50  |
| fix_phone  | 0.2830 | 0.0102  | 0.4510  | -0.4428 | 0.0801  | -0.3109 | -0.4442 | 0.4614  | 0.00  |
| cell_phone | 0.2302 | 0.4619  | -0.3300 | 0.3720  | -0.1279 | 0.0862  | -0.0462 | 0.5596  | -0.38 |
| tivi       | 0.1819 | 0.4928  | 0.2053  | -0.2179 | 0.5328  | 0.0283  | 0.5882  | -0.0465 | 0.00  |
| radio      | 0.1304 | -0.0806 | 0.7017  | 0.6915  | -0.0123 | 0.0334  | 0.0433  | -0.0384 | 0.00  |



|          |        |         |         |         |         |         |         |         |       |
|----------|--------|---------|---------|---------|---------|---------|---------|---------|-------|
| irrigate | 0.3769 | 0.0822  | 0.1245  | -0.1892 | -0.2754 | 0.0488  | -0.0363 | -0.3814 | -0.46 |
| motor    | 0.2528 | 0.4913  | -0.1429 | 0.1644  | 0.1017  | -0.0344 | -0.5093 | -0.4053 | 0.45  |
| wash     | 0.3831 | -0.1565 | -0.0228 | -0.1290 | -0.0742 | 0.3149  | -0.0397 | -0.2734 | -0.30 |
| airc     | 0.3039 | -0.2838 | -0.0551 | -0.0302 | 0.2567  | 0.7144  | -0.0810 | 0.2512  | 0.28  |
| pc       | 0.3777 | -0.2640 | -0.2241 | 0.1608  | 0.1516  | -0.3990 | 0.1117  | -0.0649 | -0.00 |
| internet | 0.3548 | -0.3322 | -0.2509 | 0.1468  | 0.2701  | -0.3455 | 0.0973  | 0.0299  | 0.04  |

| Variable   | Unexplained |
|------------|-------------|
| toilet     | 0           |
| fix_phone  | 0           |
| cell_phone | 0           |
| tivi       | 0           |
| radio      | 0           |
| fridge     | 0           |
| motor      | 0           |
| wash       | 0           |
| airc       | 0           |
| pc         | 0           |
| internet   | 0           |

```
.
. * Create variable
. predict wscore0
(score assumed)
(10 components skipped)
```

Scoring coefficients  
sum of squares(column-loading) = 1

| Variable   | Comp1  | Comp2   | Comp3   | Comp4   | Comp5   | Comp6   | Comp7   | Comp8   | Com   |
|------------|--------|---------|---------|---------|---------|---------|---------|---------|-------|
| toilet     | 0.3214 | 0.0628  | 0.0242  | -0.1100 | -0.6631 | -0.0483 | 0.4023  | 0.1326  | 0.50  |
| fix_phone  | 0.2830 | 0.0102  | 0.4510  | -0.4428 | 0.0801  | -0.3109 | -0.4442 | 0.4614  | 0.00  |
| cell_phone | 0.2302 | 0.4619  | -0.3300 | 0.3720  | -0.1279 | 0.0862  | -0.0462 | 0.5596  | -0.38 |
| tivi       | 0.1819 | 0.4928  | 0.2053  | -0.2179 | 0.5328  | 0.0283  | 0.5882  | -0.0465 | 0.00  |
| radio      | 0.1304 | -0.0806 | 0.7017  | 0.6915  | -0.0123 | 0.0334  | 0.0433  | -0.0384 | 0.00  |
| fridge     | 0.3769 | 0.0822  | 0.1245  | -0.1892 | -0.2754 | 0.0488  | -0.0363 | -0.3814 | -0.46 |
| motor      | 0.2528 | 0.4913  | -0.1429 | 0.1644  | 0.1017  | -0.0344 | -0.5093 | -0.4053 | 0.45  |
| wash       | 0.3831 | -0.1565 | -0.0228 | -0.1290 | -0.0742 | 0.3149  | -0.0397 | -0.2734 | -0.30 |
| airc       | 0.3039 | -0.2838 | -0.0551 | -0.0302 | 0.2567  | 0.7144  | -0.0810 | 0.2512  | 0.28  |
| pc         | 0.3777 | -0.2640 | -0.2241 | 0.1608  | 0.1516  | -0.3990 | 0.1117  | -0.0649 | -0.00 |
| internet   | 0.3548 | -0.3322 | -0.2509 | 0.1468  | 0.2701  | -0.3455 | 0.0973  | 0.0299  | 0.04  |

```
.
. * Scree plot
. screeplot, yline(1) ci(het)
```

```
. *** Make wscore1 for urban
. * Check frequency of each variables
. summarize electric toilet fix_phone cell_phone tivi radio fridge car motor wash airc gene grinder boat
```

| Variable   | Obs   | Mean     | Std. Dev. | Min | Max |
|------------|-------|----------|-----------|-----|-----|
| electric   | 4,958 | .9989915 | .0317436  | 0   | 1   |
| toilet     | 4,958 | .8079871 | .3939229  | 0   | 1   |
| fix_phone  | 4,958 | .624647  | .4842628  | 0   | 1   |
| cell_phone | 4,958 | .9015732 | .2979209  | 0   | 1   |
| tivi       | 4,958 | .9417104 | .2343139  | 0   | 1   |
| radio      | 4,958 | .2666398 | .442247   | 0   | 1   |
| fridge     | 4,958 | .6385639 | .480465   | 0   | 1   |
| car        | 4,958 | .0564744 | .2308588  | 0   | 1   |
| motor      | 4,958 | .8507463 | .3563743  | 0   | 1   |
| wash       | 4,958 | .40238   | .4904272  | 0   | 1   |
| airc       | 4,958 | .1789028 | .3833096  | 0   | 1   |
| gene       | 4,958 | .0457846 | .2090387  | 0   | 1   |
| grinder    | 4,958 | .0100847 | .0999251  | 0   | 1   |
| boat       | 4,958 | .0183542 | .1342421  | 0   | 1   |
| pc         | 4,958 | .375353  | .4842628  | 0   | 1   |

```
internet | 4,958 .2636144 .440637 0 1
```

```
. * Remove 4 variables not in 5%-95% including electric, gene, grinder, boat
.
. * Run pca for urban
. pca toilet fix_phone cell_phone tivi radio fridge car motor wash airc pc internet if area == 1
```

```
Principal components/correlation      Number of obs = 4,958
                                      Number of comp. = 12
                                      Trace = 12
Rotation: (unrotated = principal)    Rho = 1.0000
```

| Component | Eigenvalue | Difference | Proportion | Cumulative |
|-----------|------------|------------|------------|------------|
| Comp1     | 3.89237    | 2.48919    | 0.3244     | 0.3244     |
| Comp2     | 1.40317    | .35503     | 0.1169     | 0.4413     |
| Comp3     | 1.04814    | .0807988   | 0.0873     | 0.5286     |
| Comp4     | .967343    | .0588589   | 0.0806     | 0.6093     |
| Comp5     | .908485    | .0650484   | 0.0757     | 0.6850     |
| Comp6     | .843436    | .184487    | 0.0703     | 0.7552     |
| Comp7     | .658949    | .044204    | 0.0549     | 0.8102     |
| Comp8     | .614745    | .0848969   | 0.0512     | 0.8614     |
| Comp9     | .529849    | .0369504   | 0.0442     | 0.9055     |
| Comp10    | .492898    | .0874838   | 0.0411     | 0.9466     |
| Comp11    | .405414    | .170215    | 0.0338     | 0.9804     |
| Comp12    | .2352      | .          | 0.0196     | 1.0000     |

Principal components (eigenvectors)

| Variable   | Comp1  | Comp2   | Comp3   | Comp4   | Comp5   | Comp6   | Comp7   | Comp8   | Com   |
|------------|--------|---------|---------|---------|---------|---------|---------|---------|-------|
| toilet     | 0.2567 | 0.0613  | -0.1353 | -0.1887 | -0.2380 | 0.7584  | 0.2619  | 0.3576  | 0.14  |
| fix_phone  | 0.3063 | 0.0837  | 0.4387  | -0.1118 | -0.1758 | -0.0459 | 0.2174  | -0.5929 | 0.43  |
| cell_phone | 0.2094 | 0.3528  | -0.6071 | 0.0414  | 0.2113  | 0.0525  | -0.1750 | -0.2592 | 0.42  |
| tivi       | 0.1848 | 0.5043  | 0.3701  | 0.0896  | 0.0402  | -0.3118 | 0.1600  | 0.5690  | 0.21  |
| radio      | 0.1480 | -0.1048 | 0.1674  | -0.5899 | 0.7597  | 0.0746  | 0.0261  | 0.0234  | -0.07 |
| fridge     | 0.3704 | 0.1728  | 0.2019  | -0.0270 | -0.1402 | 0.1454  | -0.0605 | -0.2151 | -0.41 |
| car        | 0.1660 | -0.1809 | 0.0934  | 0.7326  | 0.4503  | 0.2304  | 0.3533  | -0.0766 | -0.05 |
| motor      | 0.2658 | 0.4802  | -0.2410 | 0.0783  | 0.1275  | -0.1739 | -0.0213 | -0.0237 | -0.36 |
| wash       | 0.3822 | -0.0732 | 0.1051  | 0.0370  | -0.1438 | 0.0904  | -0.3850 | -0.0291 | -0.34 |
| airc       | 0.3147 | -0.2772 | 0.1370  | 0.1844  | 0.0828  | 0.0121  | -0.6429 | 0.2344  | 0.35  |
| pc         | 0.3691 | -0.2975 | -0.2616 | -0.1107 | -0.1081 | -0.2935 | 0.2794  | 0.0793  | -0.07 |
| internet   | 0.3518 | -0.3682 | -0.2235 | -0.0537 | -0.1055 | -0.3438 | 0.2421  | 0.1201  | 0.06  |

| Variable   | Unexplained |
|------------|-------------|
| toilet     | 0           |
| fix_phone  | 0           |
| cell_phone | 0           |
| tivi       | 0           |
| radio      | 0           |
| fridge     | 0           |
| car        | 0           |
| motor      | 0           |
| wash       | 0           |
| airc       | 0           |
| pc         | 0           |
| internet   | 0           |

```
. * Create variable
. predict wscore1 if area == 1
(score assumed)
(11 components skipped)
```

```
Scoring coefficients
sum of squares(column-loading) = 1
```

| Variable | Comp1 | Comp2 | Comp3 | Comp4 | Comp5 | Comp6 | Comp7 | Comp8 | Com |
|----------|-------|-------|-------|-------|-------|-------|-------|-------|-----|
|----------|-------|-------|-------|-------|-------|-------|-------|-------|-----|

|            |        |         |         |         |         |         |         |         |       |
|------------|--------|---------|---------|---------|---------|---------|---------|---------|-------|
| fix_phone  | 0.3063 | 0.0837  | 0.4387  | -0.1118 | -0.1758 | -0.0459 | 0.2174  | -0.5929 | 0.43  |
| cell_phone | 0.2094 | 0.3528  | -0.6071 | 0.0414  | 0.2113  | 0.0525  | -0.1750 | -0.2592 | 0.42  |
| tivi       | 0.1848 | 0.5043  | 0.3701  | 0.0896  | 0.0402  | -0.3118 | 0.1600  | 0.5690  | 0.21  |
| radio      | 0.1480 | -0.1048 | 0.1674  | -0.5899 | 0.7597  | 0.0746  | 0.0261  | 0.0234  | -0.07 |
| fridge     | 0.3704 | 0.1728  | 0.2019  | -0.0270 | -0.1402 | 0.1454  | -0.0605 | -0.2151 | -0.41 |
| car        | 0.1660 | -0.1809 | 0.0934  | 0.7326  | 0.4503  | 0.2304  | 0.3533  | -0.0766 | -0.05 |
| motor      | 0.2658 | 0.4802  | -0.2410 | 0.0783  | 0.1275  | -0.1739 | -0.0213 | -0.0237 | -0.36 |
| wash       | 0.3822 | -0.0732 | 0.1051  | 0.0370  | -0.1438 | 0.0904  | -0.3850 | -0.0291 | -0.34 |
| airc       | 0.3147 | -0.2772 | 0.1370  | 0.1844  | 0.0828  | 0.0121  | -0.6429 | 0.2344  | 0.35  |
| pc         | 0.3691 | -0.2975 | -0.2616 | -0.1107 | -0.1081 | -0.2935 | 0.2794  | 0.0793  | -0.07 |
| internet   | 0.3518 | -0.3682 | -0.2235 | -0.0537 | -0.1055 | -0.3438 | 0.2421  | 0.1201  | 0.06  |

```

.
.
. *** Make wscore2 for rural
. * Check frequency of each variables
. summarize electric toilet fix_phone cell_phone tivi radio fridge car motor wash airc gene grinder boat

```

| Variable   | Obs   | Mean     | Std. Dev. | Min | Max |
|------------|-------|----------|-----------|-----|-----|
| electric   | 4,967 | .9792631 | .1425164  | 0   | 1   |
| toilet     | 4,967 | .3460842 | .4757683  | 0   | 1   |
| fix_phone  | 4,967 | .4308436 | .4952441  | 0   | 1   |
| cell_phone | 4,967 | .7471311 | .4347002  | 0   | 1   |
| tivi       | 4,967 | .897121  | .3038314  | 0   | 1   |
| radio      | 4,967 | .2230723 | .4163483  | 0   | 1   |
| fridge     | 4,967 | .2830683 | .4505347  | 0   | 1   |
| car        | 4,967 | .0193276 | .1376874  | 0   | 1   |
| motor      | 4,967 | .7304208 | .4437859  | 0   | 1   |
| wash       | 4,967 | .0825448 | .2752206  | 0   | 1   |
| airc       | 4,967 | .0177169 | .1319339  | 0   | 1   |
| gene       | 4,967 | .030602  | .1722541  | 0   | 1   |
| grinder    | 4,967 | .0515402 | .221119   | 0   | 1   |
| boat       | 4,967 | .0664385 | .2490721  | 0   | 1   |
| pc         | 4,967 | .0914033 | .2882107  | 0   | 1   |
| internet   | 4,967 | .042279  | .2012453  | 0   | 1   |

```

. * Remove 5 variables not in 5%-95% including electric, car, airc, gene, internet

```

```

. * Run pca for rural
. pca toilet fix_phone cell_phone tivi radio fridge motor wash grinder boat pc if area == 2

```

```

Principal components/correlation      Number of obs   =      4,967
                                      Number of comp. =        11
                                      Trace           =        11
Rotation: (unrotated = principal)    Rho             =      1.0000

```

| Component | Eigenvalue | Difference | Proportion | Cumulative |
|-----------|------------|------------|------------|------------|
| Comp1     | 2.83673    | 1.49509    | 0.2579     | 0.2579     |
| Comp2     | 1.34164    | .280575    | 0.1220     | 0.3799     |
| Comp3     | 1.06107    | .0875997   | 0.0965     | 0.4763     |
| Comp4     | .973466    | .033364    | 0.0885     | 0.5648     |
| Comp5     | .940102    | .0688322   | 0.0855     | 0.6503     |
| Comp6     | .87127     | .182324    | 0.0792     | 0.7295     |
| Comp7     | .688946    | .0268995   | 0.0626     | 0.7921     |
| Comp8     | .662047    | .0595017   | 0.0602     | 0.8523     |
| Comp9     | .602545    | .0725929   | 0.0548     | 0.9071     |
| Comp10    | .529952    | .0377196   | 0.0482     | 0.9553     |
| Comp11    | .492232    | .          | 0.0447     | 1.0000     |

```

Principal components (eigenvectors)

```

| Variable   | Comp1  | Comp2   | Comp3   | Comp4   | Comp5   | Comp6   | Comp7   | Comp8   | Comp  |
|------------|--------|---------|---------|---------|---------|---------|---------|---------|-------|
| toilet     | 0.3867 | -0.1754 | -0.1115 | 0.0036  | -0.0481 | -0.0667 | -0.6732 | 0.2315  | 0.41  |
| fix_phone  | 0.2938 | -0.2340 | 0.0768  | -0.2501 | 0.4810  | -0.4830 | 0.1381  | -0.4105 | 0.06  |
| cell_phone | 0.3178 | 0.4973  | -0.1500 | 0.1701  | -0.1587 | 0.2359  | -0.0652 | -0.0706 | -0.02 |
| tivi       | 0.2850 | 0.4025  | -0.1064 | -0.0684 | 0.3177  | -0.3116 | 0.2528  | 0.6652  | -0.10 |

|         |        |         |         |         |         |         |         |         |       |
|---------|--------|---------|---------|---------|---------|---------|---------|---------|-------|
| motor   | 0.3414 | 0.4364  | -0.1343 | -0.0245 | 0.0612  | 0.1602  | 0.0667  | -0.5370 | -0.00 |
| wash    | 0.3629 | -0.3182 | 0.0825  | -0.0790 | -0.3024 | 0.0804  | 0.0943  | 0.0910  | -0.69 |
| grinder | 0.0369 | 0.1849  | 0.6234  | -0.6519 | 0.0365  | 0.3454  | -0.0672 | 0.1037  | 0.11  |
| boat    | 0.0565 | 0.2240  | 0.6431  | 0.3965  | -0.3426 | -0.4944 | -0.0318 | -0.0772 | 0.04  |
| pc      | 0.3461 | -0.2763 | -0.0008 | 0.0544  | -0.3025 | 0.1663  | 0.6233  | 0.0924  | 0.53  |

```
-----
Variable | Unexplained
-----+-----
toilet | 0
fix_phone | 0
cell_phone | 0
tivi | 0
radio | 0
fridge | 0
motor | 0
wash | 0
grinder | 0
boat | 0
pc | 0
-----
```

```
. * Create variable
. predict wscore2 if area == 2
(score assumed)
(10 components skipped)
```

Scoring coefficients  
sum of squares(column-loading) = 1

| Variable   | Comp1  | Comp2   | Comp3   | Comp4   | Comp5   | Comp6   | Comp7   | Comp8   | Com   |
|------------|--------|---------|---------|---------|---------|---------|---------|---------|-------|
| toilet     | 0.3867 | -0.1754 | -0.1115 | 0.0036  | -0.0481 | -0.0667 | -0.6732 | 0.2315  | 0.41  |
| fix_phone  | 0.2938 | -0.2340 | 0.0768  | -0.2501 | 0.4810  | -0.4830 | 0.1381  | -0.4105 | 0.06  |
| cell_phone | 0.3178 | 0.4973  | -0.1500 | 0.1701  | -0.1587 | 0.2359  | -0.0652 | -0.0706 | -0.02 |
| tivi       | 0.2850 | 0.4025  | -0.1064 | -0.0684 | 0.3177  | -0.3116 | 0.2528  | 0.6652  | -0.10 |
| radio      | 0.1444 | -0.1639 | 0.3474  | 0.5560  | 0.5733  | 0.4310  | -0.0049 | 0.0684  | -0.04 |
| fridge     | 0.4341 | -0.1609 | 0.0122  | -0.0527 | -0.0784 | -0.0159 | -0.2286 | -0.0624 | -0.15 |
| motor      | 0.3414 | 0.4364  | -0.1343 | -0.0245 | 0.0612  | 0.1602  | 0.0667  | -0.5370 | -0.00 |
| wash       | 0.3629 | -0.3182 | 0.0825  | -0.0790 | -0.3024 | 0.0804  | 0.0943  | 0.0910  | -0.69 |
| grinder    | 0.0369 | 0.1849  | 0.6234  | -0.6519 | 0.0365  | 0.3454  | -0.0672 | 0.1037  | 0.11  |
| boat       | 0.0565 | 0.2240  | 0.6431  | 0.3965  | -0.3426 | -0.4944 | -0.0318 | -0.0772 | 0.04  |
| pc         | 0.3461 | -0.2763 | -0.0008 | 0.0544  | -0.3025 | 0.1663  | 0.6233  | 0.0924  | 0.53  |

```
.
.
. *** Score data from coefficient vectors using matrix score - wcom1
. * Make the regress and coef
. quietly regress wscore0 wscore1

. matrix coefs = e(b)

. matrix list coefs

coefs[1,2]
      wscore1      _cons
y1 1.0328658 .90707496

.
. * Scoring the data with this vector would create a new variable equal to the linear combination
. * Form this linear combination
. matrix score wcom1 = coefs

.
. * Check wcom1
. summarize wcom1
```

| Variable | Obs   | Mean    | Std. Dev. | Min       | Max      |
|----------|-------|---------|-----------|-----------|----------|
| wcom1    | 4,958 | .907075 | 2.037749  | -3.752484 | 5.033465 |

```

. * make the regress and coe
. quietly regress wscore0 wscore2

. matrix coefs = e(b)

. matrix list coefs

coefs[1,2]
      wscore2      _cons
y1 .85466233  -.9054314

.
. * Scoring the data with this vector would create a new variable equal to the linear combination
. * Form this linear combination
. matrix score wcom2 = coefs

```

```

.
. * Check wcom1
. summarize wcom2

```

| Variable | Obs   | Mean      | Std. Dev. | Min       | Max      |
|----------|-------|-----------|-----------|-----------|----------|
| wcom2    | 4,967 | -.9054314 | 1.439473  | -3.536861 | 3.358375 |

```

.
.
. *** Make the final wscore from wcom1 and wcom2
. gen WSCORE = wcom1
(4,967 missing values generated)

. replace WSCORE = wcom2 if area == 2
(4,967 real changes made)

```

```

.
. *** Cut to quintile to make wealthindex
. xtile wi=WSCORE [pw = weight], nq(5)

```

```

. * Check the wi
. tab wi

```

| 5 quantiles | Freq. | Percent | Cum.   |
|-------------|-------|---------|--------|
| of WSCORE   |       |         |        |
| 1           | 2,106 | 21.22   | 21.22  |
| 2           | 1,624 | 16.36   | 37.58  |
| 3           | 1,674 | 16.87   | 54.45  |
| 4           | 2,029 | 20.44   | 74.89  |
| 5           | 2,492 | 25.11   | 100.00 |
| Total       | 9,925 | 100.00  |        |

```

. by wi, sort: summarize WSCORE

```

```

> -
-> wi = 1

```

| Variable | Obs   | Mean      | Std. Dev. | Min       | Max       |
|----------|-------|-----------|-----------|-----------|-----------|
| WSCORE   | 2,106 | -2.369935 | .6059737  | -3.752484 | -1.533452 |

```

> -
-> wi = 2

```

| Variable | Obs   | Mean      | Std. Dev. | Min      | Max       |
|----------|-------|-----------|-----------|----------|-----------|
| WSCORE   | 1,624 | -1.302514 | .1943723  | -1.52912 | -.9457986 |

```

> -
-> wi = 3

```

```
-----
> -
-> wi = 4
```

| Variable | Obs   | Mean     | Std. Dev. | Min       | Max      |
|----------|-------|----------|-----------|-----------|----------|
| WSCORE   | 2,029 | .5284624 | .4217433  | -.1101432 | 1.467825 |

```
-----
> -
-> wi = 5
```

| Variable | Obs   | Mean     | Std. Dev. | Min      | Max      |
|----------|-------|----------|-----------|----------|----------|
| WSCORE   | 2,492 | 2.803964 | .9898326  | 1.476386 | 5.033465 |

```
. * Recode wi: 1=poorest, 2=poorer, 3=midle, 4=richer, 5=richest
.
. * Check with smoke
. tab smoke wi, col chi
```

```
+-----+
| Key |
|-----|
| frequency |
| column percentage |
+-----+
```

| smoke | 5 quantiles of WSCORE |                 |                 |                 |                 | Total           |
|-------|-----------------------|-----------------|-----------------|-----------------|-----------------|-----------------|
|       | 1                     | 2               | 3               | 4               | 5               |                 |
| 0     | 1,592<br>75.59        | 1,200<br>73.89  | 1,283<br>76.64  | 1,562<br>76.98  | 2,028<br>81.38  | 7,665<br>77.23  |
| 1     | 514<br>24.41          | 424<br>26.11    | 391<br>23.36    | 467<br>23.02    | 464<br>18.62    | 2,260<br>22.77  |
| Total | 2,106<br>100.00       | 1,624<br>100.00 | 1,674<br>100.00 | 2,029<br>100.00 | 2,492<br>100.00 | 9,925<br>100.00 |

Pearson chi2(4) = 38.3075 Pr = 0.000

```
.
. *** Finally, save the dataset
. save "gats10-wi.dta", replace
file gats10-wi.dta saved

.
.
. ***** GATS 2015
.
. *** Import data set of GATS2010
. use "gats15.dta", clear
(Written by R. )

.
. *** Make wscore0 for general
. * Check frequency of each variables
. summarize electric toilet fix_phone cell_phone tivi radio fridge car motor wash airc gene grinder boat
```

| Variable   | Obs   | Mean     | Std. Dev. | Min | Max |
|------------|-------|----------|-----------|-----|-----|
| electric   | 8,996 | .9897732 | .1006146  | 0   | 1   |
| toilet     | 8,996 | .738217  | .4396296  | 0   | 1   |
| fix_phone  | 8,996 | .1747443 | .3797694  | 0   | 1   |
| cell_phone | 8,996 | .9484215 | .2211867  | 0   | 1   |
| tivi       | 8,996 | .9474211 | .2232038  | 0   | 1   |
| radio      | 8,996 | .1477323 | .3548542  | 0   | 1   |
| fridge     | 8,996 | .7291018 | .4444483  | 0   | 1   |
| car        | 8,996 | .0472432 | .2121705  | 0   | 1   |

|          |       |          |          |   |   |
|----------|-------|----------|----------|---|---|
| airc     | 8,996 | .2441155 | .4299119 | 0 | 1 |
| gene     | 8,996 | .0402401 | .1965328 | 0 | 1 |
| grinder  | 8,996 | .0234549 | .1513515 | 0 | 1 |
| boat     | 8,996 | .0347932 | .1832659 | 0 | 1 |
| pc       | 8,996 | .3292574 | .4699697 | 0 | 1 |
| -----    |       |          |          |   |   |
| internet | 8,996 | .3905069 | .4878911 | 0 | 1 |

. \* Remove 5 variables not in 5%-95% including electric, car, gene, grinder, boat

. \* Run pca for general (only for frequency 5% - 95%)

. pca toilet fix\_phone cell\_phone tivi radio fridge motor wash airc pc internet

```
Principal components/correlation      Number of obs =      8,996
                                     Number of comp. =      11
                                     Trace =      11
Rotation: (unrotated = principal)    Rho =      1.0000
```

| Component | Eigenvalue | Difference | Proportion | Cumulative |
|-----------|------------|------------|------------|------------|
| Comp1     | 3.7453     | 2.31461    | 0.3405     | 0.3405     |
| Comp2     | 1.43068    | .361245    | 0.1301     | 0.4705     |
| Comp3     | 1.06944    | .194619    | 0.0972     | 0.5678     |
| Comp4     | .874821    | .0703587   | 0.0795     | 0.6473     |
| Comp5     | .804462    | .123605    | 0.0731     | 0.7204     |
| Comp6     | .680857    | .0448526   | 0.0619     | 0.7823     |
| Comp7     | .636005    | .0140792   | 0.0578     | 0.8401     |
| Comp8     | .621926    | .131007    | 0.0565     | 0.8967     |
| Comp9     | .490919    | .0998807   | 0.0446     | 0.9413     |
| Comp10    | .391038    | .136486    | 0.0355     | 0.9769     |
| Comp11    | .254552    | .          | 0.0231     | 1.0000     |

Principal components (eigenvectors)

| Variable   | Comp1  | Comp2   | Comp3   | Comp4   | Comp5   | Comp6   | Comp7   | Comp8   | Com   |
|------------|--------|---------|---------|---------|---------|---------|---------|---------|-------|
| toilet     | 0.3240 | 0.0206  | 0.1787  | -0.3981 | -0.3372 | -0.3623 | 0.2988  | 0.3345  | 0.50  |
| fix_phone  | 0.2280 | -0.2608 | 0.2716  | 0.0226  | 0.8254  | -0.2505 | 0.2023  | 0.1278  | -0.04 |
| cell_phone | 0.1865 | 0.5372  | -0.1062 | 0.3598  | 0.0670  | 0.0353  | -0.1183 | 0.7032  | -0.14 |
| tivi       | 0.1874 | 0.4728  | 0.2855  | -0.2999 | 0.2084  | 0.6499  | 0.1708  | -0.2034 | 0.16  |
| radio      | 0.0683 | -0.0779 | 0.7797  | 0.5358  | -0.2808 | 0.0080  | -0.0648 | -0.0936 | 0.02  |
| fridge     | 0.3586 | 0.1961  | 0.1470  | -0.2875 | -0.1642 | -0.2317 | 0.0007  | -0.1893 | -0.69 |
| motor      | 0.2322 | 0.4495  | -0.2208 | 0.3140  | 0.1299  | -0.4274 | -0.0669 | -0.5329 | 0.32  |
| wash       | 0.4024 | -0.1150 | -0.0143 | -0.1649 | -0.0458 | -0.0464 | -0.3804 | -0.0300 | -0.14 |
| airc       | 0.3515 | -0.2372 | -0.0360 | -0.0552 | 0.0656  | 0.2088  | -0.6728 | 0.0449  | 0.28  |
| pc         | 0.3910 | -0.2448 | -0.2181 | 0.2480  | -0.0776 | 0.2385  | 0.3038  | -0.0525 | -0.05 |
| internet   | 0.3842 | -0.2085 | -0.2722 | 0.2481  | -0.1480 | 0.2081  | 0.3581  | -0.0410 | -0.02 |

| Variable   | Unexplained |
|------------|-------------|
| toilet     | 0           |
| fix_phone  | 0           |
| cell_phone | 0           |
| tivi       | 0           |
| radio      | 0           |
| fridge     | 0           |
| motor      | 0           |
| wash       | 0           |
| airc       | 0           |
| pc         | 0           |
| internet   | 0           |

. \* Create variable  
. predict wscore0  
(score assumed)  
(10 components skipped)

Scoring coefficients

```

-----+-----
  toilet | 0.3240 0.0206 0.1787 -0.3981 -0.3372 -0.3623 0.2988 0.3345 0.50
  fix_phone | 0.2280 -0.2608 0.2716 0.0226 0.8254 -0.2505 0.2023 0.1278 -0.04
  cell_phone | 0.1865 0.5372 -0.1062 0.3598 0.0670 0.0353 -0.1183 0.7032 -0.14
    tivi | 0.1874 0.4728 0.2855 -0.2999 0.2084 0.6499 0.1708 -0.2034 0.16
    radio | 0.0683 -0.0779 0.7797 0.5358 -0.2808 0.0080 -0.0648 -0.0936 0.02
  fridge | 0.3586 0.1961 0.1470 -0.2875 -0.1642 -0.2317 0.0007 -0.1893 -0.69
    motor | 0.2322 0.4495 -0.2208 0.3140 0.1299 -0.4274 -0.0669 -0.5329 0.32
    wash | 0.4024 -0.1150 -0.0143 -0.1649 -0.0458 -0.0464 -0.3804 -0.0300 -0.14
    airc | 0.3515 -0.2372 -0.0360 -0.0552 0.0656 0.2088 -0.6728 0.0449 0.28
    pc | 0.3910 -0.2448 -0.2181 0.2480 -0.0776 0.2385 0.3038 -0.0525 -0.05
  internet | 0.3842 -0.2085 -0.2722 0.2481 -0.1480 0.2081 0.3581 -0.0410 -0.02
-----+-----

```

```

.
.
. *** Make wscore1 for urban
. * Check frequency of each variables
. summarize electric toilet fix_phone cell_phone tivi radio fridge car motor wash airc gene grinder boat

```

| Variable   | Obs   | Mean     | Std. Dev. | Min | Max |
|------------|-------|----------|-----------|-----|-----|
| electric   | 4,421 | .9979643 | .0450783  | 0   | 1   |
| toilet     | 4,421 | .894594  | .3071106  | 0   | 1   |
| fix_phone  | 4,421 | .2660032 | .4419159  | 0   | 1   |
| cell_phone | 4,421 | .9690115 | .173306   | 0   | 1   |
| tivi       | 4,421 | .9635829 | .1873468  | 0   | 1   |
| radio      | 4,421 | .1515494 | .3586242  | 0   | 1   |
| fridge     | 4,421 | .8421172 | .3646724  | 0   | 1   |
| car        | 4,421 | .066727  | .2495768  | 0   | 1   |
| motor      | 4,421 | .9174395 | .2752479  | 0   | 1   |
| wash       | 4,421 | .6154716 | .4865386  | 0   | 1   |
| airc       | 4,421 | .3938023 | .4886472  | 0   | 1   |
| gene       | 4,421 | .046822  | .2112813  | 0   | 1   |
| grinder    | 4,421 | .0122144 | .1098543  | 0   | 1   |
| boat       | 4,421 | .0214884 | .1450219  | 0   | 1   |
| pc         | 4,421 | .4917439 | .4999884  | 0   | 1   |
| internet   | 4,421 | .5521375 | .4973305  | 0   | 1   |

```

. * Remove 6 variables not in 5%-95% including electric, cell_phone, tivi, gene, grinder, boat
.
. * Run pca for urban
. pca toilet fix_phone radio fridge car motor wash airc pc internet if area == 1

```

```

Principal components/correlation           Number of obs = 4,421
                                          Number of comp. = 10
                                          Trace = 10
Rotation: (unrotated = principal)        Rho = 1.0000

```

| Component | Eigenvalue | Difference | Proportion | Cumulative |
|-----------|------------|------------|------------|------------|
| Comp1     | 3.38295    | 2.26805    | 0.3383     | 0.3383     |
| Comp2     | 1.11491    | .0620011   | 0.1115     | 0.4498     |
| Comp3     | 1.05291    | .148055    | 0.1053     | 0.5551     |
| Comp4     | .90485     | .046075    | 0.0905     | 0.6456     |
| Comp5     | .858775    | .0835133   | 0.0859     | 0.7314     |
| Comp6     | .775262    | .0849797   | 0.0775     | 0.8090     |
| Comp7     | .690282    | .128658    | 0.0690     | 0.8780     |
| Comp8     | .561624    | .152196    | 0.0562     | 0.9342     |
| Comp9     | .409428    | .160415    | 0.0409     | 0.9751     |
| Comp10    | .249013    | .          | 0.0249     | 1.0000     |

Principal components (eigenvectors)

| Variable | Comp1  | Comp2   | Comp3  | Comp4  | Comp5   | Comp6  | Comp7  | Comp8  | Comp  |
|----------|--------|---------|--------|--------|---------|--------|--------|--------|-------|
| toilet   | 0.2759 | -0.0995 | 0.5123 | 0.1528 | -0.3007 | 0.2740 | 0.5492 | 0.3971 | -0.05 |



```

      motor | 0.2227 -0.4409 0.1278 0.0129 0.7214 -0.3622 0.0528 0.2903 0.02
      wash | 0.4205 -0.0289 0.1136 0.0935 -0.1102 -0.0576 -0.3957 -0.0888 -0.78
      airc | 0.3772 0.1107 -0.0836 0.0759 -0.2291 -0.0248 -0.5554 0.5195 0.44
      pc | 0.4171 -0.0379 -0.3480 -0.3312 0.0155 0.1770 0.1825 -0.1117 0.00
      internet | 0.4045 -0.1086 -0.3581 -0.3499 0.0246 0.2197 0.1937 -0.0793 0.04
-----

```

```

. * Create variable
. predict wscore1 if area == 1
(score assumed)
(9 components skipped)

```

```

Scoring coefficients
sum of squares(column-loading) = 1

```

```

-----
Variable |   Comp1   Comp2   Comp3   Comp4   Comp5   Comp6   Comp7   Comp8   Com
-----+-----
toilet | 0.2759 -0.0995 0.5123 0.1528 -0.3007 0.2740 0.5492 0.3971 -0.05
fix_phone | 0.2421 0.4869 -0.0155 -0.0497 -0.1543 -0.7525 0.3259 -0.0501 0.02
radio | 0.0655 0.6733 0.3408 -0.2699 0.4849 0.3252 -0.0919 0.0547 -0.02
fridge | 0.3524 -0.1390 0.4332 0.1644 -0.0009 0.0074 -0.1264 -0.6736 0.41
car | 0.1749 0.2442 -0.3847 0.7922 0.2543 0.1953 0.1704 -0.0471 -0.00
motor | 0.2227 -0.4409 0.1278 0.0129 0.7214 -0.3622 0.0528 0.2903 0.02
wash | 0.4205 -0.0289 0.1136 0.0935 -0.1102 -0.0576 -0.3957 -0.0888 -0.78
airc | 0.3772 0.1107 -0.0836 0.0759 -0.2291 -0.0248 -0.5554 0.5195 0.44
pc | 0.4171 -0.0379 -0.3480 -0.3312 0.0155 0.1770 0.1825 -0.1117 0.00
internet | 0.4045 -0.1086 -0.3581 -0.3499 0.0246 0.2197 0.1937 -0.0793 0.04
-----

```

```

.
.
. *** Make wscore2 for rural
. * Check frequency of each variables
. summarize electric toilet fix_phone cell_phone tivi radio fridge car motor wash airc gene grinder boat

```

```

Variable |   Obs   Mean   Std. Dev.   Min   Max
-----+-----
electric | 4,575 .9818579 .1334797 0 1
toilet | 4,575 .5871038 .4924083 0 1
fix_phone | 4,575 .0865574 .2812161 0 1
cell_phone | 4,575 .9285246 .2576455 0 1
tivi | 4,575 .9318033 .2521107 0 1
-----+-----
radio | 4,575 .1440437 .3511724 0 1
fridge | 4,575 .6198907 .4854665 0 1
car | 4,575 .0284153 .1661743 0 1
motor | 4,575 .8485246 .3585508 0 1
wash | 4,575 .2574863 .4372973 0 1
-----+-----
airc | 4,575 .100765 .3010502 0 1
gene | 4,575 .0338798 .1809395 0 1
grinder | 4,575 .0343169 .1820619 0 1
boat | 4,575 .0476503 .2130485 0 1
pc | 4,575 .1722404 .3776306 0 1
-----+-----
internet | 4,575 .2343169 .4236174 0 1

```

```

. * Remove 5 variables not in 5%-95% including electric, car, gene, grinder, boat
.
. * Run pca for rural
. pca toilet fix_phone cell_phone tivi radio fridge motor wash airc pc internet if area == 2

```

```

Principal components/correlation      Number of obs = 4,575
                                      Number of comp. = 11
                                      Trace = 11
Rotation: (unrotated = principal)     Rho = 1.0000

```

```

-----
Component | Eigenvalue Difference Proportion Cumulative
-----+-----
Comp1 | 3.31625 1.83438 0.3015 0.3015
Comp2 | 1.48188 .421517 0.1347 0.4362

```

|        |         |          |        |        |
|--------|---------|----------|--------|--------|
| Comp8  | .593744 | .0750566 | 0.0540 | 0.8791 |
| Comp9  | .518687 | .0475299 | 0.0472 | 0.9263 |
| Comp10 | .471158 | .131575  | 0.0428 | 0.9691 |
| Comp11 | .339582 | .        | 0.0309 | 1.0000 |

Principal components (eigenvectors)

| Variable   | Comp1  | Comp2   | Comp3   | Comp4   | Comp5   | Comp6   | Comp7   | Comp8   | Com   |
|------------|--------|---------|---------|---------|---------|---------|---------|---------|-------|
| toilet     | 0.3402 | -0.0278 | 0.2498  | -0.0564 | -0.4723 | -0.3495 | -0.1408 | 0.4420  | 0.50  |
| fix_phone  | 0.1644 | -0.2011 | 0.3283  | 0.8653  | 0.2566  | 0.0031  | -0.0069 | 0.0794  | -0.01 |
| cell_phone | 0.2105 | 0.5417  | -0.0828 | -0.0292 | 0.2670  | 0.1636  | 0.1835  | 0.6722  | -0.25 |
| tivi       | 0.2243 | 0.4661  | 0.2229  | 0.0686  | -0.1140 | -0.1607 | 0.6390  | -0.4410 | 0.12  |
| radio      | 0.0915 | -0.1002 | 0.7435  | -0.4502 | 0.4430  | 0.0994  | -0.1090 | -0.0349 | 0.00  |
| fridge     | 0.3741 | 0.1658  | 0.1533  | -0.0088 | -0.3059 | -0.0717 | -0.3433 | -0.2604 | -0.54 |
| motor      | 0.2503 | 0.4365  | -0.2102 | 0.0885  | 0.2655  | 0.1927  | -0.5496 | -0.2743 | 0.44  |
| wash       | 0.3942 | -0.1688 | -0.0350 | 0.0022  | -0.2658 | 0.2991  | -0.0615 | 0.0272  | -0.29 |
| airc       | 0.3202 | -0.2733 | -0.0770 | -0.0792 | -0.1028 | 0.6848  | 0.2850  | -0.0360 | 0.27  |
| pc         | 0.3845 | -0.2668 | -0.2440 | -0.0943 | 0.3193  | -0.2709 | 0.1277  | -0.0730 | -0.05 |
| internet   | 0.3818 | -0.2135 | -0.2936 | -0.1290 | 0.2887  | -0.3759 | 0.0706  | -0.0206 | 0.00  |

| Variable   | Unexplained |
|------------|-------------|
| toilet     | 0           |
| fix_phone  | 0           |
| cell_phone | 0           |
| tivi       | 0           |
| radio      | 0           |
| fridge     | 0           |
| motor      | 0           |
| wash       | 0           |
| airc       | 0           |
| pc         | 0           |
| internet   | 0           |

```
. * Create variable
. predict wscore2 if area == 2
(score assumed)
(10 components skipped)
```

```
Scoring coefficients
sum of squares(column-loading) = 1
```

| Variable   | Comp1  | Comp2   | Comp3   | Comp4   | Comp5   | Comp6   | Comp7   | Comp8   | Com   |
|------------|--------|---------|---------|---------|---------|---------|---------|---------|-------|
| toilet     | 0.3402 | -0.0278 | 0.2498  | -0.0564 | -0.4723 | -0.3495 | -0.1408 | 0.4420  | 0.50  |
| fix_phone  | 0.1644 | -0.2011 | 0.3283  | 0.8653  | 0.2566  | 0.0031  | -0.0069 | 0.0794  | -0.01 |
| cell_phone | 0.2105 | 0.5417  | -0.0828 | -0.0292 | 0.2670  | 0.1636  | 0.1835  | 0.6722  | -0.25 |
| tivi       | 0.2243 | 0.4661  | 0.2229  | 0.0686  | -0.1140 | -0.1607 | 0.6390  | -0.4410 | 0.12  |
| radio      | 0.0915 | -0.1002 | 0.7435  | -0.4502 | 0.4430  | 0.0994  | -0.1090 | -0.0349 | 0.00  |
| fridge     | 0.3741 | 0.1658  | 0.1533  | -0.0088 | -0.3059 | -0.0717 | -0.3433 | -0.2604 | -0.54 |
| motor      | 0.2503 | 0.4365  | -0.2102 | 0.0885  | 0.2655  | 0.1927  | -0.5496 | -0.2743 | 0.44  |
| wash       | 0.3942 | -0.1688 | -0.0350 | 0.0022  | -0.2658 | 0.2991  | -0.0615 | 0.0272  | -0.29 |
| airc       | 0.3202 | -0.2733 | -0.0770 | -0.0792 | -0.1028 | 0.6848  | 0.2850  | -0.0360 | 0.27  |
| pc         | 0.3845 | -0.2668 | -0.2440 | -0.0943 | 0.3193  | -0.2709 | 0.1277  | -0.0730 | -0.05 |
| internet   | 0.3818 | -0.2135 | -0.2936 | -0.1290 | 0.2887  | -0.3759 | 0.0706  | -0.0206 | 0.00  |

```
.
.
. *** Score data from coefficient vectors using matrix score - wcom1
. * Make the regress and coef
. quietly regress wscore0 wscore1

. matrix coefs = e(b)
```

```

.
. * Scoring the data with this vector would create a new variable equal to the linear combination
. * Form this linear combination
. matrix score wcom1 = coefs

```

```

.
. * Check wcom1
. summarize wcom1

```

| Variable | Obs   | Mean    | Std. Dev. | Min       | Max      |
|----------|-------|---------|-----------|-----------|----------|
| wcom1    | 4,421 | .850256 | 1.776957  | -3.279942 | 3.858304 |

```

.
.
. *** Score data from coefficient vectors using matrix score - wcom2
. * Make the regress and coef
. quietly regress wscore0 wscore2

```

```

. matrix coefs = e(b)

```

```

. matrix list coefs

```

```

coefs[1,2]
      wscore2      _cons
y1   .92882899  -.82163531

```

```

.
. * Scoring the data with this vector would create a new variable equal to the linear combination
. * Form this linear combination
. matrix score wcom2 = coefs

```

```

.
. * Check wcom2
. summarize wcom2

```

| Variable | Obs   | Mean      | Std. Dev. | Min       | Max      |
|----------|-------|-----------|-----------|-----------|----------|
| wcom2    | 4,575 | -.8216353 | 1.691452  | -4.423059 | 3.561571 |

```

.
.
. *** Make the final wscore from wcom1 and wcom2
. gen WSCORE = wcom1
(4,575 missing values generated)

```

```

. replace WSCORE = wcom2 if area == 2
(4,575 real changes made)

```

```

.
. *** Cut to quintile to make wealthindex
. xtile wi=WSCORE [pw = weight], nq(5)

```

```

.
. * Check the wi
. tab wi

```

| 5 quantiles of WSCORE | Freq. | Percent | Cum.   |
|-----------------------|-------|---------|--------|
| 1                     | 1,922 | 21.37   | 21.37  |
| 2                     | 1,606 | 17.85   | 39.22  |
| 3                     | 1,817 | 20.20   | 59.42  |
| 4                     | 1,810 | 20.12   | 79.54  |
| 5                     | 1,841 | 20.46   | 100.00 |
| Total                 | 8,996 | 100.00  |        |

```

. by wi, sort: summarize WSCORE

```

```
-----
> -
-> wi = 2
```

| Variable | Obs   | Mean      | Std. Dev. | Min       | Max       |
|----------|-------|-----------|-----------|-----------|-----------|
| WSCORE   | 1,606 | -1.235596 | .3070301  | -1.605991 | -.8318407 |

```
-----
> -
-> wi = 3
```

| Variable | Obs   | Mean      | Std. Dev. | Min       | Max      |
|----------|-------|-----------|-----------|-----------|----------|
| WSCORE   | 1,817 | -.2606061 | .3659416  | -.8243687 | .2476547 |

```
-----
> -
-> wi = 4
```

| Variable | Obs   | Mean     | Std. Dev. | Min      | Max      |
|----------|-------|----------|-----------|----------|----------|
| WSCORE   | 1,810 | 1.219978 | .460294   | .2527223 | 1.938952 |

```
-----
> -
-> wi = 5
```

| Variable | Obs   | Mean     | Std. Dev. | Min      | Max      |
|----------|-------|----------|-----------|----------|----------|
| WSCORE   | 1,841 | 2.757751 | .4204089  | 1.939202 | 3.858304 |

```
. * Recode wi: 1=poorest, 2=poorer, 3=midle, 4=richer, 5=richest
.
. * Check with smoke
. tab smoke wi, col chi
```

```
+-----+
| Key |
+-----+
| frequency |
| column percentage |
+-----+
```

| smoke | 5 quantiles of WSCORE |                 |                 |                 |                 | Total           |
|-------|-----------------------|-----------------|-----------------|-----------------|-----------------|-----------------|
|       | 1                     | 2               | 3               | 4               | 5               |                 |
| 0     | 1,423<br>74.04        | 1,225<br>76.28  | 1,394<br>76.72  | 1,461<br>80.72  | 1,521<br>82.62  | 7,024<br>78.08  |
| 1     | 499<br>25.96          | 381<br>23.72    | 423<br>23.28    | 349<br>19.28    | 320<br>17.38    | 1,972<br>21.92  |
| Total | 1,922<br>100.00       | 1,606<br>100.00 | 1,817<br>100.00 | 1,810<br>100.00 | 1,841<br>100.00 | 8,996<br>100.00 |

Pearson chi2(4) = 52.8803 Pr = 0.000

```
.
.
. *** Finally, save the dataset
. save "gats15-wi.dta", replace
file gats15-wi.dta saved

.
.
. * Close log
. log close
name: <unnamed>
```
